# Supplementary material for: Identification of Age-Related Macular Degeneration Related Genes by Applying Shortest Path Algorithm in Protein-Protein Interaction Network
Source: Hindawi journal article supplement (doi:10.1155/2013/523415), 2013-01-01
Supplement: f1 [file 523415.f1.zip]

**Supplementary Material I.** 168 Shortest path genes with betweenness greater than zero and their permutation FDRs

| <b>Ensemble ID of genes</b>  | <b>Gene name</b> | <b>Betweenness</b> | <b>Permutation FDR</b> |
|------------------------------|------------------|--------------------|------------------------|
| ENSP00000245907 <sup>a</sup> | C3               | 336                | 0                      |
| ENSP00000313419              | CD19             | 319                | 0                      |
| ENSP00000356024              | CR2              | 319                | 0                      |
| ENSP00000264033              | CBL              | 295                | 0                      |
| ENSP00000275493              | EGFR             | 195                | 0                      |
| ENSP00000344456              | CTNNB1           | 172                | 0                      |
| ENSP00000344818              | UBC              | 158                | 0                      |
| ENSP00000269305              | TP53             | 114                | 0                      |
| ENSP00000415941              | C4B              | 111                | 0                      |
| ENSP00000284981              | APP              | 104                | 0                      |
| ENSP00000326366              | PSEN1            | 104                | 0                      |
| ENSP00000356016              | CR1              | 101                | 0                      |
| ENSP00000350941              | SRC              | 98                 | 0                      |
| ENSP00000269571              | ERBB2            | 95                 | 0                      |
| ENSP00000339007              | GRB2             | 95                 | 0                      |
| ENSP00000263253              | EP300            | 91                 | 0                      |
| ENSP00000356399              | CFH              | 72                 | 0                      |
| ENSP00000252486              | APOE             | 68                 | 0                      |
| ENSP00000262160              | SMAD2            | 68                 | 0                      |
| ENSP00000264657              | STAT3            | 58                 | 0                      |
| ENSP00000360266              | JUN              | 49                 | 0                      |
| ENSP00000226574              | NFKB1            | 48                 | 0                      |
| ENSP00000401303              | SHC1             | 47                 | 0                      |
| ENSP00000211998              | VCL              | 38                 | 0                      |
| ENSP00000215631              | GADD45B          | 38                 | 0                      |
| ENSP00000221494              | SF3A2            | 38                 | 0                      |
| ENSP00000233242              | APOB             | 38                 | 0                      |
| ENSP00000236850              | APOA1            | 38                 | 0                      |
| ENSP00000243776              | CHPF             | 38                 | 0                      |
| ENSP00000245323              | EFNB2            | 38                 | 0                      |
| ENSP00000252034              | ELN              | 38                 | 0                      |
| ENSP00000261769              | CDH1             | 38                 | 0                      |
| ENSP00000262613              | SLC9A3R1         | 38                 | 0                      |
| ENSP00000263980              | SLC9A1           | 38                 | 0                      |
| ENSP00000267996              | TPM1             | 38                 | 0                      |

|                 |          |    |       |
|-----------------|----------|----|-------|
| ENSP00000268171 | FURIN    | 38 | 0     |
| ENSP00000275815 | EPHA1    | 38 | 0     |
| ENSP00000277541 | NOTCH1   | 38 | 0     |
| ENSP00000281821 | EPHA4    | 38 | 0     |
| ENSP00000285379 | CA2      | 38 | 0     |
| ENSP00000305913 | COL8A2   | 38 | 0     |
| ENSP00000306866 | GABARAP  | 38 | 0     |
| ENSP00000319248 | ZEB1     | 38 | 0     |
| ENSP00000322788 | MMP1     | 38 | 0     |
| ENSP00000333769 | BSG      | 38 | 0     |
| ENSP00000338934 | EZR      | 38 | 0     |
| ENSP00000341562 | B4GALNT1 | 38 | 0     |
| ENSP00000346437 | ATG7     | 38 | 0     |
| ENSP00000347978 | ERCC5    | 38 | 0     |
| ENSP00000353542 | SPRR2D   | 38 | 0     |
| ENSP00000355572 | COA6     | 38 | 0     |
| ENSP00000357392 | EFNA1    | 38 | 0     |
| ENSP00000357731 | LOR      | 38 | 0     |
| ENSP00000358640 | SLC16A1  | 38 | 0     |
| ENSP00000363970 | MAP1LC3A | 38 | 0     |
| ENSP00000374455 | SQSTM1   | 38 | 0     |
| ENSP00000375986 | MAP3K4   | 38 | 0     |
| ENSP00000382193 | MYBPC3   | 38 | 0     |
| ENSP00000309845 | HRAS     | 38 | 0.004 |
| ENSP00000219070 | MMP2     | 37 | 0     |
| ENSP00000252444 | LDLR     | 37 | 0     |
| ENSP00000287727 | ZFYVE9   | 37 | 0     |
| ENSP00000340944 | PTPN11   | 37 | 0     |
| ENSP00000357697 | S100A2   | 37 | 0     |
| ENSP00000360025 | GADD45A  | 37 | 0     |
| ENSP00000356395 | CFHR3    | 36 | 0     |
| ENSP00000333919 | BTLA     | 35 | 0     |
| ENSP00000347948 | TNFRSF14 | 35 | 0     |
| ENSP00000340858 | B2M      | 34 | 0     |
| ENSP00000283635 | CD8A     | 34 | 0.002 |
| ENSP00000227667 | APOC3    | 33 | 0     |
| ENSP00000261799 | PDGFRB   | 32 | 0     |
| ENSP00000351273 | CASP8    | 31 | 0     |
| ENSP00000215829 | SNRPD3   | 30 | 0     |

|                 |        |    |       |
|-----------------|--------|----|-------|
| ENSP00000252622 | LSM7   | 30 | 0     |
| ENSP00000361405 | MMP9   | 30 | 0     |
| ENSP00000384273 | RELA   | 30 | 0     |
| ENSP00000398597 | EXOSC6 | 30 | 0     |
| ENSP00000337825 | LCK    | 29 | 0     |
| ENSP00000379625 | MYD88  | 29 | 0     |
| ENSP00000348634 | MYH6   | 28 | 0     |
| ENSP00000384675 | SOS1   | 28 | 0     |
| ENSP00000304903 | CD2BP2 | 24 | 0     |
| ENSP00000356346 | PTPRC  | 24 | 0     |
| ENSP00000358490 | CD2    | 24 | 0     |
| ENSP00000285398 | ERCC3  | 23 | 0     |
| ENSP00000256443 | CDK7   | 22 | 0     |
| ENSP00000324806 | GSK3B  | 22 | 0     |
| ENSP00000226730 | IL2    | 21 | 0     |
| ENSP00000259808 | RIPK1  | 21 | 0.002 |
| ENSP00000244007 | PLCG1  | 20 | 0.002 |
| ENSP00000263923 | KDR    | 19 | 0     |
| ENSP00000353483 | MAPK8  | 19 | 0     |
| ENSP00000228307 | PXN    | 18 | 0     |
| ENSP00000338018 | HIF1A  | 18 | 0     |
| ENSP00000285021 | XPC    | 15 | 0     |
| ENSP00000011653 | CD4    | 14 | 0     |
| ENSP00000350708 | RAD23B | 14 | 0     |
| ENSP00000357879 | PSMD4  | 14 | 0     |
| ENSP00000216797 | NFKBIA | 14 | 0.004 |
| ENSP00000361626 | YBX1   | 13 | 0.006 |
| ENSP00000046794 | LCP2   | 11 | 0     |
| ENSP00000359206 | BTRC   | 11 | 0.002 |
| ENSP00000221930 | TGFB1  | 11 | 0.016 |
| ENSP00000300574 | CRK    | 10 | 0.004 |
| ENSP00000227507 | CCND1  | 10 | 0.006 |
| ENSP00000347507 | MYH7   | 10 | 0.012 |
| ENSP00000329623 | BCL2   | 10 | 0.02  |
| ENSP00000304895 | IRS1   | 9  | 0.002 |
| ENSP00000368438 | PCNA   | 9  | 0.006 |
| ENSP00000361021 | PTEN   | 9  | 0.028 |
| ENSP00000052754 | DCN    | 8  | 0     |
| ENSP00000206249 | ESR1   | 8  | 0     |

|                 |          |   |       |
|-----------------|----------|---|-------|
| ENSP00000229135 | IFNG     | 8 | 0     |
| ENSP00000400591 | SNRPE    | 8 | 0     |
| ENSP00000366135 | EXOSC10  | 8 | 0.004 |
| ENSP00000301838 | FADD     | 7 | 0.004 |
| ENSP00000280357 | IL18     | 7 | 0.008 |
| ENSP00000263341 | IL1B     | 7 | 0.01  |
| ENSP00000263967 | PIK3CA   | 6 | 0     |
| ENSP00000162749 | TNFRSF1A | 6 | 0.006 |
| ENSP00000358622 | IKBKG    | 6 | 0.01  |
| ENSP00000339151 | IKBKB    | 6 | 0.03  |
| ENSP00000218388 | TIMP1    | 5 | 0     |
| ENSP00000341189 | PTK2     | 5 | 0.02  |
| ENSP00000251849 | RAF1     | 4 | 0.002 |
| ENSP00000262158 | SMAD7    | 4 | 0.006 |
| ENSP00000363868 | ABCA1    | 4 | 0.006 |
| ENSP00000344115 | CDH5     | 4 | 0.01  |
| ENSP00000414006 | LSM2     | 3 | 0     |
| ENSP00000254227 | NR0B2    | 3 | 0.022 |
| ENSP00000274335 | PIK3R1   | 3 | 0.032 |
| ENSP00000332973 | SMAD3    | 3 | 0.138 |
| ENSP00000335153 | HSP90AA1 | 3 | 0.144 |
| ENSP00000329357 | SP1      | 3 | 0.34  |
| ENSP00000215832 | MAPK1    | 2 | 0.002 |
| ENSP00000346300 | CRKL     | 2 | 0.004 |
| ENSP00000338799 | IL6ST    | 2 | 0.022 |
| ENSP00000344352 | ATF3     | 2 | 0.034 |
| ENSP00000359424 | CHUK     | 2 | 0.042 |
| ENSP00000268035 | IGF1R    | 2 | 0.044 |
| ENSP00000258743 | IL6      | 2 | 0.066 |
| ENSP00000367207 | MYC      | 2 | 0.424 |
| ENSP00000222254 | PIK3R2   | 1 | 0.002 |
| ENSP00000271628 | SF3B4    | 1 | 0.008 |
| ENSP00000252506 | GADD45G  | 1 | 0.014 |
| ENSP00000400326 | DDX39B   | 1 | 0.014 |
| ENSP00000371138 | FKBP1A   | 1 | 0.016 |
| ENSP00000360683 | PTPN1    | 1 | 0.02  |
| ENSP00000380227 | ITGA4    | 1 | 0.02  |
| ENSP00000253727 | NR1H2    | 1 | 0.022 |
| ENSP00000274376 | RASA1    | 1 | 0.028 |

|                 |        |   |       |
|-----------------|--------|---|-------|
| ENSP00000340210 | CD59   | 1 | 0.028 |
| ENSP00000231509 | NR3C1  | 1 | 0.038 |
| ENSP00000264972 | ZAP70  | 1 | 0.044 |
| ENSP00000354558 | MTOR   | 1 | 0.062 |
| ENSP00000256897 | CCNH   | 1 | 0.072 |
| ENSP00000309503 | YWHAZ  | 1 | 0.08  |
| ENSP00000309103 | BAD    | 1 | 0.108 |
| ENSP00000266970 | CDK2   | 1 | 0.156 |
| ENSP00000354394 | STAT1  | 1 | 0.202 |
| ENSP00000371067 | JAK2   | 1 | 0.222 |
| ENSP00000262367 | CREBBP | 1 | 0.25  |
| ENSP00000362649 | HDAC1  | 1 | 0.278 |
| ENSP00000346839 | FN1    | 1 | 0.342 |
| ENSP00000350283 | BRCA1  | 1 | 0.562 |
| ENSP00000352516 | DNMT1  | 1 | 0.676 |
| ENSP00000270202 | AKT1   | 1 | 0.776 |

a: Ensemble IDs in red are known AMD related genes
