# Supplementary material for: Identification of Age-Related Macular Degeneration Related Genes by Applying Shortest Path Algorithm in Protein-Protein Interaction Network
Source: Biomed Res Int. 2013 Dec 18;2013:523415. doi: 10.1155/2013/523415 (PMC3878555; doi:10.1155/2013/523415)
Supplement: Supplementary file 1 — The description of the Supplementary Material is as follows: "The Supplementary Material contains three files. In details, Supplementary Material I lists 168 shortest path genes identified by our method; Supplementary Material II lists the GO analysis results of 125 genes; Supplementary Material III lists the KEGG analysis results of 125 genes" [file 523415.f1.zip]

Archive with 3 entries (3 files):
- Supp_III.xlsx
- Supp-I.pdf
- Supp-II.xlsx
