# Supplementary material for: Identification of Age-Related Macular Degeneration Related Genes by Applying Shortest Path Algorithm in Protein-Protein Interaction Network
Source: Biomed Res Int. 2013 Dec 18;2013:523415. doi: 10.1155/2013/523415 (PMC3878555; doi:10.1155/2013/523415)
Supplement: Supplementary file 1 — The description of the Supplementary Material is as follows: "The Supplementary Material contains three files. In details, Supplementary Material I lists 168 shortest path genes identified by our method; Supplementary Material II lists the GO analysis results of 125 genes; Supplementary Material III lists the KEGG analysis results of 125 genes" [file 523415.f1.zip › Supp-II.xlsx]

## Sheet: GO_enrichment
Supplementary Material II. GO enrichment results of 125 genes
Category	Term	Count	Percentage	P-value	Genes	List Total	Pop Hits	Pop Total	Fold Enrichment	Bonferroni	Benjamini	FDR
GOTERM_BP_FAT	GO:0010647~positive regulation of cell communication	25	20	1.52437e-15	920, 3265, 841, 5781, 1956, 5970, 925, 5045, 2099, 1499, 4615, 3458, 8772, 8737, 3553, 3558, 2064, 6714, 3091, 7316, 7132, 3667, 3932, 5788, 6654	123	329	13528	8.35743	3.25318e-12	3.25318e-12	2.68674e-12
GOTERM_BP_FAT	GO:0042981~regulation of apoptosis	36	28.8	1.97668e-15	3725, 841, 3265, 8517, 5599, 1956, 5970, 4851, 2932, 5663, 2071, 5045, 2099, 2073, 4615, 3458, 8772, 8737, 8878, 3553, 3558, 2064, 6714, 4318, 914, 7316, 7157, 351, 5290, 4790, 4792, 3932, 5788, 6654, 999, 5594	123	804	13528	4.92465	4.18265e-12	2.09133e-12	3.45279e-12
GOTERM_BP_FAT	GO:0010604~positive regulation of macromolecule metabolic process	37	29.6	2.09748e-15	3725, 920, 3265, 6774, 6464, 2033, 5970, 4851, 5710, 8945, 2071, 5663, 5045, 2099, 8764, 1499, 3458, 8878, 3553, 10062, 4092, 3558, 595, 3091, 10533, 7316, 7157, 7132, 351, 1022, 3667, 4790, 4792, 6935, 5788, 5594, 4087	123	857	13528	4.74842	4.41502e-12	1.47171e-12	3.64153e-12
GOTERM_BP_FAT	GO:0043067~regulation of programmed cell death	36	28.8	2.5498e-15	3725, 841, 3265, 8517, 5599, 1956, 5970, 4851, 2932, 5663, 2071, 5045, 2099, 2073, 4615, 3458, 8772, 8737, 8878, 3553, 3558, 2064, 6714, 4318, 914, 7316, 7157, 351, 5290, 4790, 4792, 3932, 5788, 6654, 999, 5594	123	812	13528	4.87613	5.3445e-12	1.33615e-12	4.41869e-12
GOTERM_BP_FAT	GO:0010941~regulation of cell death	36	28.8	2.92168e-15	3725, 841, 3265, 8517, 5599, 1956, 5970, 4851, 2932, 5663, 2071, 5045, 2099, 2073, 4615, 3458, 8772, 8737, 8878, 3553, 3558, 2064, 6714, 4318, 914, 7316, 7157, 351, 5290, 4790, 4792, 3932, 5788, 6654, 999, 5594	123	815	13528	4.85818	6.04161e-12	1.20837e-12	4.9849e-12
GOTERM_BP_FAT	GO:0009967~positive regulation of signal transduction	23	18.4	1.70903e-14	920, 3265, 841, 6714, 2064, 5781, 5970, 3091, 5045, 925, 2099, 1499, 7132, 4615, 3458, 8772, 8737, 3667, 3553, 3932, 5788, 6654, 3558	123	295	13528	8.575	3.57849e-11	5.96412e-12	2.95541e-11
GOTERM_BP_FAT	GO:0007167~enzyme linked receptor protein signaling pathway	24	19.2	3.7104e-14	3725, 920, 2041, 6714, 2064, 5781, 6774, 5894, 1956, 6464, 2043, 3791, 925, 867, 9372, 1942, 3937, 2885, 3667, 5829, 4092, 6654, 4087, 5159	123	342	13528	7.71816	7.76115e-11	1.10874e-11	6.40932e-11
GOTERM_BP_FAT	GO:0007242~intracellular signaling cascade	42	33.6	7.6776e-14	8517, 3265, 5599, 6774, 5781, 5894, 1956, 19, 6464, 2932, 5663, 2099, 335, 1499, 4616, 3458, 8737, 8878, 3553, 5111, 4092, 595, 2064, 6714, 6548, 4216, 345, 7508, 7157, 1942, 1398, 5290, 1399, 1022, 5335, 2885, 3667, 4792, 6654, 5788, 5594, 4087	123	1256	13528	3.6778	1.608e-10	2.00999e-11	1.32794e-10
GOTERM_BP_FAT	GO:0007169~transmembrane receptor protein tyrosine kinase signaling pathway	20	16	1.22685e-13	920, 2041, 6714, 2064, 5781, 6774, 5894, 1956, 6464, 2043, 3791, 925, 867, 1942, 3937, 2885, 3667, 5829, 6654, 5159	123	224	13528	9.81998	2.56768e-10	2.85298e-11	2.12041e-10
GOTERM_BP_FAT	GO:0044093~positive regulation of molecular function	29	23.2	2.3128e-13	920, 8517, 5781, 1956, 6464, 2033, 5970, 5663, 8945, 5710, 335, 4616, 4615, 3458, 7168, 8737, 3553, 10062, 3558, 595, 2064, 4216, 3091, 7316, 7157, 1942, 3667, 3932, 5788	123	586	13528	5.44288	4.84026e-10	4.84026e-11	3.99725e-10
GOTERM_MF_FAT	GO:0019899~enzyme binding	27	21.6	3.64634e-13	1003, 920, 338, 5781, 6774, 19, 1956, 6634, 5970, 2932, 5045, 1499, 335, 8878, 4092, 595, 2064, 3091, 57819, 7157, 3667, 4792, 3932, 5788, 4087, 5594, 999	115	523	12983	5.82827	1.35995e-10	1.35995e-10	5.03364e-10
GOTERM_BP_FAT	GO:0032268~regulation of cellular protein metabolic process	26	20.8	6.22552e-13	3725, 920, 2033, 1956, 5663, 8945, 5710, 5045, 8764, 335, 3458, 8737, 3553, 10062, 4092, 3558, 5159, 595, 10533, 7316, 351, 7076, 4790, 4792, 5788, 5594	123	474	13528	6.03286	1.3029e-09	1.18445e-10	1.07596e-09
GOTERM_BP_FAT	GO:0010033~response to organic substance	31	24.8	9.8685e-13	3725, 920, 841, 338, 5781, 6774, 682, 760, 1956, 6464, 2033, 5970, 2099, 1499, 3949, 4615, 3458, 8737, 3553, 595, 2064, 6714, 6548, 7132, 2885, 3667, 567, 4792, 999, 5594, 4087	123	721	13528	4.72884	2.06553e-09	1.72128e-10	1.70576e-09
GOTERM_BP_FAT	GO:0007166~cell surface receptor linked signal transduction	49	39.2	1.6483e-12	3725, 5781, 6774, 5894, 682, 6464, 4851, 335, 4615, 5159, 2064, 930, 3791, 345, 1942, 2885, 4792, 5788, 6654, 4087, 5594, 920, 3265, 8517, 9368, 19, 1956, 2932, 5663, 8945, 925, 867, 8764, 1499, 3458, 151888, 5829, 4092, 3558, 595, 2041, 6714, 2043, 914, 9372, 351, 3937, 3667, 3932	123	1856	13528	2.90367	3.44999e-09	2.65384e-10	2.84908e-09
GOTERM_BP_FAT	GO:0007243~protein kinase cascade	23	18.4	1.71047e-12	6714, 2064, 8517, 5599, 5781, 6774, 6548, 1956, 6464, 4216, 5663, 1942, 5290, 4616, 3458, 1399, 2885, 8737, 3667, 3553, 4792, 5788, 5594	123	370	13528	6.83683	3.58012e-09	2.55723e-10	2.95655e-09
GOTERM_BP_FAT	GO:0042325~regulation of phosphorylation	25	20	3.21036e-12	3725, 920, 8517, 5781, 1956, 6464, 5663, 8764, 335, 4616, 3458, 1647, 8737, 3553, 4092, 3558, 5159, 595, 2064, 4216, 1942, 351, 1022, 3667, 5788	123	466	13528	5.90042	6.7192e-09	4.47947e-10	5.54886e-09
GOTERM_BP_FAT	GO:0002684~positive regulation of immune system process	19	15.2	4.04667e-12	920, 8517, 930, 3606, 5970, 914, 5663, 1380, 4615, 3458, 1378, 721, 567, 3553, 4792, 3932, 5788, 5594, 3558	123	238	13528	8.78021	8.46964e-09	5.29353e-10	6.99442e-09
GOTERM_BP_FAT	GO:0043085~positive regulation of catalytic activity	26	20.8	4.81354e-12	920, 8517, 5781, 1956, 6464, 5663, 8945, 5710, 335, 4616, 3458, 7168, 8737, 3553, 10062, 3558, 595, 2064, 4216, 3091, 7316, 7157, 1942, 3667, 3932, 5788	123	520	13528	5.49919	1.00746e-08	5.92625e-10	8.31984e-09
GOTERM_BP_FAT	GO:0006468~protein amino acid phosphorylation	29	23.2	5.33538e-12	5599, 5781, 5894, 1956, 6464, 2932, 2071, 5663, 4616, 3458, 8737, 3553, 4092, 5159, 595, 2041, 2064, 6714, 4216, 2043, 3791, 1942, 351, 5290, 1022, 3932, 5788, 5594, 4087	123	667	13528	4.7819	1.1167e-08	6.20388e-10	9.22195e-09
GOTERM_BP_FAT	GO:0051174~regulation of phosphorus metabolic process	25	20	7.48639e-12	3725, 920, 8517, 5781, 1956, 6464, 5663, 8764, 335, 4616, 3458, 1647, 8737, 3553, 4092, 3558, 5159, 595, 2064, 4216, 1942, 351, 1022, 3667, 5788	123	485	13528	5.66926	1.56689e-08	8.2468e-10	1.29397e-08
GOTERM_BP_FAT	GO:0019220~regulation of phosphate metabolic process	25	20	7.48639e-12	3725, 920, 8517, 5781, 1956, 6464, 5663, 8764, 335, 4616, 3458, 1647, 8737, 3553, 4092, 3558, 5159, 595, 2064, 4216, 1942, 351, 1022, 3667, 5788	123	485	13528	5.66926	1.56689e-08	8.2468e-10	1.29397e-08
GOTERM_BP_FAT	GO:0031328~positive regulation of cellular biosynthetic process	29	23.2	1.00621e-11	3725, 920, 3265, 6774, 1956, 19, 6464, 2033, 4851, 5970, 2071, 1499, 3458, 8878, 3553, 10062, 3558, 3091, 7316, 7157, 351, 7132, 1022, 3667, 4790, 4792, 6935, 4087, 5594	123	685	13528	4.65625	2.10599e-08	1.05299e-09	1.73917e-08
GOTERM_CC_FAT	GO:0005829~cytosol	40	32	1.08465e-11	3725, 84557, 841, 8517, 5599, 5781, 6635, 5894, 6464, 5970, 6634, 2932, 7414, 5710, 8945, 867, 1499, 4615, 8772, 8737, 8878, 4092, 595, 6714, 7316, 9372, 7157, 1398, 5290, 7430, 3937, 5335, 2885, 4790, 4792, 3932, 5296, 6654, 5594, 4087	117	1330	12782	3.28565	3.22142e-09	3.22142e-09	1.4472e-08
GOTERM_BP_FAT	GO:0051173~positive regulation of nitrogen compound metabolic process	28	22.4	1.41693e-11	3725, 3265, 6774, 19, 1956, 6464, 2033, 4851, 5970, 2071, 1499, 3458, 8878, 3553, 10062, 3558, 3091, 7316, 7157, 351, 7132, 1022, 4790, 4792, 6935, 5788, 4087, 5594	123	644	13528	4.7819	2.96564e-08	1.41221e-09	2.44909e-08
GOTERM_BP_FAT	GO:0009891~positive regulation of biosynthetic process	29	23.2	1.4188e-11	3725, 920, 3265, 6774, 1956, 19, 6464, 2033, 4851, 5970, 2071, 1499, 3458, 8878, 3553, 10062, 3558, 3091, 7316, 7157, 351, 7132, 1022, 3667, 4790, 4792, 6935, 4087, 5594	123	695	13528	4.58925	2.96955e-08	1.34979e-09	2.45232e-08
GOTERM_CC_FAT	GO:0045121~membrane raft	15	12	3.86236e-11	920, 6714, 2064, 841, 682, 19, 6548, 5663, 5045, 867, 7132, 3949, 8772, 3667, 3932	117	143	12782	11.4596	1.14712e-08	5.73561e-09	5.15338e-08
GOTERM_BP_FAT	GO:0010557~positive regulation of macromolecule biosynthetic process	27	21.6	1.16644e-10	3725, 920, 3265, 6774, 6464, 2033, 4851, 5970, 2071, 1499, 3458, 8878, 3553, 10062, 3558, 3091, 7316, 7157, 351, 7132, 1022, 3667, 4790, 4792, 6935, 4087, 5594	123	654	13528	4.54061	2.44136e-07	1.06146e-08	2.01613e-07
GOTERM_BP_FAT	GO:0043065~positive regulation of apoptosis	22	17.6	2.30809e-10	3725, 841, 6714, 8517, 5599, 4318, 4851, 914, 5663, 2071, 7316, 7157, 351, 3458, 8772, 8737, 8878, 3553, 3932, 5788, 6654, 5594	123	430	13528	5.62708	4.83083e-07	2.01285e-08	3.98941e-07
GOTERM_BP_FAT	GO:0045935~positive regulation of nucleobase, nucleoside, nucleotide and nucleic acid metabolic process	26	20.8	2.40705e-10	3725, 3265, 6774, 6464, 19, 2033, 4851, 5970, 2071, 1499, 3458, 8878, 10062, 3558, 3091, 7316, 7157, 351, 7132, 1022, 4790, 4792, 5788, 6935, 4087, 5594	123	624	13528	4.58266	5.03795e-07	2.01518e-08	4.16045e-07
GOTERM_BP_FAT	GO:0043068~positive regulation of programmed cell death	22	17.6	2.62202e-10	3725, 841, 6714, 8517, 5599, 4318, 4851, 914, 5663, 2071, 7316, 7157, 351, 3458, 8772, 8737, 8878, 3553, 3932, 5788, 6654, 5594	123	433	13528	5.58809	5.48789e-07	2.11073e-08	4.53202e-07
GOTERM_BP_FAT	GO:0010942~positive regulation of cell death	22	17.6	2.85301e-10	3725, 841, 6714, 8517, 5599, 4318, 4851, 914, 5663, 2071, 7316, 7157, 351, 3458, 8772, 8737, 8878, 3553, 3932, 5788, 6654, 5594	123	435	13528	5.5624	5.97134e-07	2.21161e-08	4.93126e-07
GOTERM_BP_FAT	GO:0032270~positive regulation of cellular protein metabolic process	17	13.6	2.92422e-10	595, 920, 2033, 5663, 10533, 5710, 8945, 5045, 7316, 8764, 3458, 3553, 4792, 10062, 4092, 3558, 5594	123	233	13528	8.02456	6.1204e-07	2.18586e-08	5.05436e-07
GOTERM_BP_FAT	GO:0048584~positive regulation of response to stimulus	17	13.6	3.53297e-10	6714, 8517, 930, 5970, 5663, 3791, 1380, 7132, 4615, 1378, 3667, 721, 567, 3553, 4792, 5788, 5594	123	236	13528	7.92256	7.3945e-07	2.54983e-08	6.10654e-07
GOTERM_BP_FAT	GO:0016310~phosphorylation	29	23.2	3.73913e-10	5599, 5781, 5894, 1956, 6464, 2932, 2071, 5663, 4616, 3458, 8737, 3553, 4092, 5159, 595, 2041, 2064, 6714, 4216, 2043, 3791, 1942, 351, 5290, 1022, 3932, 5788, 5594, 4087	123	800	13528	3.98691	7.826e-07	2.60867e-08	6.46288e-07
GOTERM_BP_FAT	GO:0043066~negative regulation of apoptosis	20	16	3.77191e-10	3265, 2064, 5599, 1956, 4851, 5970, 2932, 5663, 5045, 7316, 2099, 2073, 7157, 5290, 4615, 8878, 3553, 4790, 4792, 3558	123	354	13528	6.21377	7.89461e-07	2.54665e-08	6.51954e-07
GOTERM_BP_FAT	GO:0051347~positive regulation of transferase activity	17	13.6	4.52671e-10	595, 920, 2064, 8517, 5781, 1956, 6464, 4216, 5663, 335, 1942, 4616, 8737, 3667, 3553, 5788, 3558	123	240	13528	7.79051	9.47441e-07	2.96075e-08	7.82417e-07
GOTERM_BP_FAT	GO:0042592~homeostatic process	28	22.4	4.55494e-10	3725, 338, 8517, 5781, 6774, 9368, 19, 2033, 5663, 335, 1499, 3949, 3458, 3553, 4092, 3558, 5159, 2064, 6548, 3091, 3791, 345, 7157, 351, 3667, 7076, 3932, 5788	123	751	13528	4.10059	9.53349e-07	2.88894e-08	7.87296e-07
GOTERM_BP_FAT	GO:0043069~negative regulation of programmed cell death	20	16	4.77823e-10	3265, 2064, 5599, 1956, 4851, 5970, 2932, 5663, 5045, 7316, 2099, 2073, 7157, 5290, 4615, 8878, 3553, 4790, 4792, 3558	123	359	13528	6.12723	1.00008e-06	2.94142e-08	8.2589e-07
GOTERM_BP_FAT	GO:0060548~negative regulation of cell death	20	16	5.0073e-10	3265, 2064, 5599, 1956, 4851, 5970, 2932, 5663, 5045, 7316, 2099, 2073, 7157, 5290, 4615, 8878, 3553, 4790, 4792, 3558	123	360	13528	6.11021	1.04803e-06	2.99436e-08	8.65484e-07
GOTERM_BP_FAT	GO:0051247~positive regulation of protein metabolic process	17	13.6	5.43449e-10	595, 920, 2033, 5663, 10533, 5710, 8945, 5045, 7316, 8764, 3458, 3553, 4792, 10062, 4092, 3558, 5594	123	243	13528	7.69434	1.13744e-06	3.15955e-08	9.39322e-07
GOTERM_BP_FAT	GO:0051338~regulation of transferase activity	20	16	8.67984e-10	595, 920, 2064, 8517, 5781, 1956, 6464, 4216, 5663, 335, 351, 1942, 4616, 1022, 1647, 8737, 3667, 3553, 5788, 3558	123	372	13528	5.9131	1.81669e-06	4.90997e-08	1.50026e-06
GOTERM_BP_FAT	GO:0031399~regulation of protein modification process	18	14.4	1.17691e-09	3725, 595, 920, 1956, 5663, 10533, 5710, 8945, 7316, 8764, 335, 3458, 8737, 3553, 5788, 4092, 5159, 3558	123	295	13528	6.71087	2.46326e-06	6.48228e-08	2.03422e-06
GOTERM_BP_FAT	GO:0042127~regulation of cell proliferation	28	22.4	1.27518e-09	3725, 1003, 3265, 1956, 6464, 3606, 4851, 5970, 8764, 1499, 4615, 3458, 3553, 151888, 3558, 5159, 595, 2064, 3091, 3791, 7157, 3667, 7076, 4792, 6935, 5788, 5594, 4087	123	787	13528	3.91302	2.66895e-06	6.84348e-08	2.20408e-06
GOTERM_BP_FAT	GO:0033674~positive regulation of kinase activity	16	12.8	2.37071e-09	595, 920, 2064, 8517, 5781, 1956, 6464, 4216, 5663, 1942, 4616, 8737, 3667, 3553, 5788, 3558	123	231	13528	7.61792	4.96188e-06	1.24047e-07	4.09764e-06
GOTERM_BP_FAT	GO:0043549~regulation of kinase activity	19	15.2	3.09339e-09	595, 920, 2064, 8517, 5781, 1956, 6464, 4216, 5663, 351, 1942, 4616, 1022, 1647, 8737, 3667, 3553, 5788, 3558	123	357	13528	5.85348	6.47444e-06	1.57914e-07	5.34675e-06
GOTERM_BP_FAT	GO:0006915~apoptosis	24	19.2	3.5075e-09	3725, 3265, 841, 5599, 5894, 2033, 5663, 7316, 8764, 7157, 1499, 351, 7132, 4616, 3458, 8772, 1647, 8737, 8878, 3553, 4790, 4792, 3932, 6654	123	602	13528	4.38473	7.34118e-06	1.74791e-07	6.06253e-06
GOTERM_BP_FAT	GO:0012501~programmed cell death	24	19.2	4.65048e-09	3725, 3265, 841, 5599, 5894, 2033, 5663, 7316, 8764, 7157, 1499, 351, 7132, 4616, 3458, 8772, 1647, 8737, 8878, 3553, 4790, 4792, 3932, 6654	123	611	13528	4.32015	9.7334e-06	2.26359e-07	8.03809e-06
GOTERM_BP_FAT	GO:0001932~regulation of protein amino acid phosphorylation	14	11.2	5.10007e-09	595, 3725, 920, 1956, 5663, 8764, 335, 3458, 8737, 3553, 5788, 4092, 5159, 3558	123	173	13528	8.90042	1.06744e-05	2.42601e-07	8.81519e-06
GOTERM_BP_FAT	GO:0048878~chemical homeostasis	22	17.6	5.35457e-09	3725, 338, 2064, 5781, 6774, 9368, 19, 6548, 3091, 5663, 3791, 345, 7157, 335, 351, 3949, 3667, 3553, 3932, 5788, 4092, 3558	123	512	13528	4.72586	1.1207e-05	2.49047e-07	9.25507e-06
GOTERM_BP_FAT	GO:0045944~positive regulation of transcription from RNA polymerase II promoter	19	15.2	5.66447e-09	3725, 6774, 2033, 4851, 5970, 3091, 2071, 7157, 1499, 7132, 351, 1022, 8878, 4790, 4792, 10062, 6935, 3558, 4087	123	371	13528	5.63259	1.18557e-05	2.57734e-07	9.79073e-06
GOTERM_BP_FAT	GO:0033554~cellular response to stress	23	18.4	5.90766e-09	3725, 84557, 595, 5599, 5781, 4216, 2932, 3091, 5663, 2071, 2073, 7508, 7157, 3458, 1399, 1022, 7168, 1647, 8737, 5887, 5111, 5829, 5594	123	566	13528	4.4693	1.23647e-05	2.63079e-07	1.02111e-05
GOTERM_BP_FAT	GO:0050778~positive regulation of immune response	13	10.4	6.88197e-09	8517, 930, 5970, 5663, 1380, 4615, 1378, 721, 3553, 567, 4792, 5788, 5594	123	145	13528	9.86061	1.44039e-05	3.00082e-07	1.18951e-05
GOTERM_BP_FAT	GO:0050863~regulation of T cell activation	12	9.6	7.88409e-09	920, 3458, 2064, 3606, 914, 3553, 151888, 3932, 8764, 6935, 5788, 3558	123	117	13528	11.2804	1.65013e-05	3.36763e-07	1.36272e-05
GOTERM_BP_FAT	GO:0010628~positive regulation of gene expression	23	18.4	9.51239e-09	3725, 6774, 2033, 4851, 5970, 3091, 2071, 7316, 2099, 7157, 1499, 7132, 351, 3458, 1022, 8878, 4790, 4792, 10062, 6935, 5594, 3558, 4087	123	581	13528	4.35392	1.99092e-05	3.98188e-07	1.64416e-05
GOTERM_BP_FAT	GO:0000165~MAPKKK cascade	14	11.2	1.07602e-08	5599, 5781, 6464, 1956, 4216, 5663, 1942, 4616, 1399, 2885, 8737, 3553, 5788, 5594	123	184	13528	8.36833	2.25209e-05	4.41591e-07	1.85984e-05
GOTERM_BP_FAT	GO:0002253~activation of immune response	11	8.8	1.17106e-08	4615, 8517, 1378, 930, 5970, 5663, 721, 4792, 1380, 5788, 5594	123	94	13528	12.8704	2.45099e-05	4.7135e-07	2.02411e-05
GOTERM_BP_FAT	GO:0045859~regulation of protein kinase activity	18	14.4	1.24345e-08	595, 920, 2064, 8517, 5781, 1956, 6464, 4216, 5663, 351, 1942, 4616, 1022, 1647, 8737, 3553, 5788, 3558	123	345	13528	5.73828	2.60251e-05	4.91047e-07	2.14924e-05
GOTERM_BP_FAT	GO:0045860~positive regulation of protein kinase activity	15	12	1.29152e-08	595, 920, 2064, 8517, 5781, 1956, 6464, 4216, 5663, 1942, 4616, 8737, 3553, 5788, 3558	123	223	13528	7.39801	2.70312e-05	5.00584e-07	2.23232e-05
GOTERM_BP_FAT	GO:0006796~phosphate metabolic process	29	23.2	2.85613e-08	5599, 5781, 5894, 1956, 6464, 2932, 2071, 5663, 4616, 3458, 8737, 3553, 4092, 5159, 595, 2041, 2064, 6714, 4216, 2043, 3791, 1942, 351, 5290, 1022, 3932, 5788, 5594, 4087	123	973	13528	3.27804	5.97771e-05	1.08689e-06	4.93667e-05
GOTERM_BP_FAT	GO:0006793~phosphorus metabolic process	29	23.2	2.85613e-08	5599, 5781, 5894, 1956, 6464, 2932, 2071, 5663, 4616, 3458, 8737, 3553, 4092, 5159, 595, 2041, 2064, 6714, 4216, 2043, 3791, 1942, 351, 5290, 1022, 3932, 5788, 5594, 4087	123	973	13528	3.27804	5.97771e-05	1.08689e-06	4.93667e-05
GOTERM_BP_FAT	GO:0045941~positive regulation of transcription	22	17.6	2.8938e-08	3725, 6774, 2033, 4851, 5970, 3091, 2071, 7316, 7157, 1499, 7132, 351, 3458, 1022, 8878, 4790, 4792, 10062, 6935, 5594, 3558, 4087	123	564	13528	4.29015	6.05655e-05	1.08156e-06	5.00178e-05
GOTERM_BP_FAT	GO:0008284~positive regulation of cell proliferation	19	15.2	3.0939e-08	3725, 595, 3265, 2064, 1956, 6464, 4851, 3606, 5970, 3091, 3791, 3458, 3667, 7076, 3553, 5788, 5594, 3558, 5159	123	414	13528	5.04756	6.47533e-05	1.13606e-06	5.34764e-05
GOTERM_BP_FAT	GO:0002764~immune response-regulating signal transduction	9	7.2	3.43436e-08	4615, 8517, 930, 5970, 5663, 151888, 4792, 5788, 5594	123	56	13528	17.676	7.18787e-05	1.23933e-06	5.93611e-05
GOTERM_BP_FAT	GO:0007265~Ras protein signal transduction	11	8.8	3.43836e-08	3265, 6714, 1399, 2885, 5894, 19, 6464, 345, 6654, 5594, 335	123	105	13528	11.5221	7.19622e-05	1.21974e-06	5.94301e-05
GOTERM_BP_FAT	GO:0045893~positive regulation of transcription, DNA-dependent	20	16	4.97879e-08	3725, 6774, 2033, 4851, 5970, 3091, 2071, 7157, 1499, 7132, 351, 3458, 1022, 8878, 4790, 4792, 10062, 6935, 3558, 4087	123	477	13528	4.61148	0.000104201	1.73677e-06	8.60556e-05
GOTERM_MF_FAT	GO:0043566~structure-specific DNA binding	12	9.6	5.54393e-08	3725, 1956, 4851, 5887, 2073, 5111, 7508, 6935, 7157, 4904, 1499, 4087	115	145	12983	9.34309	2.06787e-05	1.03394e-05	7.65403e-05
GOTERM_BP_FAT	GO:0051254~positive regulation of RNA metabolic process	20	16	5.68125e-08	3725, 6774, 2033, 4851, 5970, 3091, 2071, 7157, 1499, 7132, 351, 3458, 1022, 8878, 4790, 4792, 10062, 6935, 3558, 4087	123	481	13528	4.57313	0.000118902	1.94932e-06	9.81973e-05
GOTERM_BP_FAT	GO:0001944~vasculature development	15	12	5.74291e-08	1003, 3725, 4313, 338, 841, 1948, 4851, 3606, 3091, 5663, 3791, 1499, 1399, 3553, 4092	123	251	13528	6.57273	0.000120192	1.93869e-06	9.9263e-05
GOTERM_CC_FAT	GO:0044459~plasma membrane part	45	36	8.13262e-08	1003, 920, 3265, 841, 760, 9368, 6464, 19, 1956, 7414, 5663, 867, 925, 2099, 8764, 1499, 3949, 7168, 8772, 8737, 151888, 5829, 4092, 5159, 2041, 2064, 6714, 4014, 1948, 6548, 930, 2043, 914, 3791, 7132, 1942, 351, 7430, 4624, 1378, 3667, 567, 3932, 5788, 999	117	2203	12782	2.23157	2.41536e-05	8.05127e-06	0.00010851
GOTERM_BP_FAT	GO:0051249~regulation of lymphocyte activation	12	9.6	9.18166e-08	920, 3458, 2064, 3606, 914, 3553, 151888, 3932, 8764, 6935, 5788, 3558	123	148	13528	8.9176	0.000192154	3.05035e-06	0.0001587
GOTERM_BP_FAT	GO:0008219~cell death	24	19.2	9.50705e-08	3725, 3265, 841, 5599, 5894, 2033, 5663, 7316, 8764, 7157, 1499, 351, 7132, 4616, 3458, 8772, 1647, 8737, 8878, 3553, 4790, 4792, 3932, 6654	123	719	13528	3.67122	0.000198963	3.1091e-06	0.000164324
GOTERM_BP_FAT	GO:0065003~macromolecular complex assembly	23	18.4	1.05397e-07	3265, 338, 6714, 841, 6635, 9368, 19, 6634, 2071, 345, 7157, 9372, 1499, 335, 7132, 8175, 1022, 8772, 2885, 3667, 5829, 999, 4087	123	665	13528	3.80395	0.000220572	3.39378e-06	0.000182173
GOTERM_BP_FAT	GO:0016265~death	24	19.2	1.07751e-07	3725, 3265, 841, 5599, 5894, 2033, 5663, 7316, 8764, 7157, 1499, 351, 7132, 4616, 3458, 8772, 1647, 8737, 8878, 3553, 4790, 4792, 3932, 6654	123	724	13528	3.64587	0.000225498	3.41702e-06	0.000186242
GOTERM_BP_FAT	GO:0009725~response to hormone stimulus	17	13.6	1.86836e-07	595, 6714, 2064, 5781, 6774, 682, 760, 6464, 2033, 5970, 2099, 1499, 3949, 2885, 3667, 3553, 5594	123	367	13528	5.09461	0.00039097	5.8365e-06	0.000322934
GOTERM_BP_FAT	GO:0006955~immune response	23	18.4	2.00002e-07	920, 8517, 4851, 3606, 5970, 5663, 925, 8764, 7157, 1380, 7132, 4615, 3937, 3458, 1378, 8878, 721, 567, 151888, 3553, 6935, 5788, 3558	123	690	13528	3.66612	0.000418518	6.15594e-06	0.000345693
GOTERM_BP_FAT	GO:0002694~regulation of leukocyte activation	12	9.6	2.95393e-07	920, 3458, 2064, 3606, 914, 3553, 151888, 3932, 8764, 6935, 5788, 3558	123	166	13528	7.95063	0.000618066	8.96021e-06	0.000510569
GOTERM_BP_FAT	GO:0001568~blood vessel development	14	11.2	3.13259e-07	1003, 3725, 4313, 338, 841, 4851, 3606, 3091, 3791, 5663, 1499, 1399, 3553, 4092	123	245	13528	6.28479	0.000655436	9.3664e-06	0.000541449
GOTERM_BP_FAT	GO:0010740~positive regulation of protein kinase cascade	12	9.6	3.13838e-07	4615, 3458, 2064, 841, 8772, 8737, 5970, 3553, 5788, 7132, 1499, 3558	123	167	13528	7.90302	0.000656647	9.25154e-06	0.00054245
GOTERM_BP_FAT	GO:0043933~macromolecular complex subunit organization	23	18.4	3.2671e-07	3265, 338, 6714, 841, 6635, 9368, 19, 6634, 2071, 345, 7157, 9372, 1499, 335, 7132, 8175, 1022, 8772, 2885, 3667, 5829, 999, 4087	123	710	13528	3.56285	0.000683571	9.49724e-06	0.000564699
GOTERM_BP_FAT	GO:0002757~immune response-activating signal transduction	8	6.4	3.89976e-07	4615, 8517, 930, 5970, 5663, 4792, 5788, 5594	123	52	13528	16.9206	0.000815887	1.1181e-05	0.00067405
GOTERM_MF_FAT	GO:0019900~kinase binding	12	9.6	4.729e-07	595, 920, 6774, 5970, 8878, 2932, 3667, 57819, 3932, 5788, 1499, 5594	115	179	12983	7.56842	0.000176376	5.87955e-05	0.00065289
GOTERM_BP_FAT	GO:0050865~regulation of cell activation	12	9.6	5.02075e-07	920, 3458, 2064, 3606, 914, 3553, 151888, 3932, 8764, 6935, 5788, 3558	123	175	13528	7.54174	0.00105029	1.42005e-05	0.000867806
GOTERM_MF_FAT	GO:0019901~protein kinase binding	11	8.8	6.34641e-07	595, 920, 6774, 5970, 8878, 2932, 3667, 57819, 3932, 5788, 5594	115	147	12983	8.44797	0.000236693	5.91786e-05	0.000876191
GOTERM_BP_FAT	GO:0009719~response to endogenous stimulus	17	13.6	7.00938e-07	595, 6714, 2064, 5781, 6774, 682, 760, 6464, 2033, 5970, 2099, 1499, 3949, 2885, 3667, 3553, 5594	123	405	13528	4.6166	0.00146599	1.95607e-05	0.00121153
GOTERM_BP_FAT	GO:0009411~response to UV	8	6.4	9.4391e-07	595, 5599, 1956, 5970, 2071, 2073, 7508, 7157	123	59	13528	14.913	0.00197365	2.59945e-05	0.00163148
GOTERM_BP_FAT	GO:0031401~positive regulation of protein modification process	12	9.6	9.71136e-07	595, 920, 3458, 5663, 5710, 8945, 10533, 7316, 3553, 8764, 4092, 3558	123	187	13528	7.05778	0.00203052	2.63969e-05	0.00167854
GOTERM_BP_FAT	GO:0009628~response to abiotic stimulus	16	12.8	1.08799e-06	595, 3725, 3265, 5599, 760, 6548, 1956, 3606, 5970, 2071, 2073, 7508, 7157, 351, 3553, 5788	123	368	13528	4.7819	0.00227458	2.91941e-05	0.00188052
GOTERM_CC_FAT	GO:0005886~plasma membrane	60	48	1.08972e-06	1003, 338, 841, 6774, 682, 5894, 2583, 6464, 4851, 2099, 335, 7168, 8772, 8737, 6566, 5159, 2064, 4313, 1948, 930, 6548, 3791, 1380, 1942, 7132, 1378, 11337, 5788, 6654, 920, 3265, 9368, 760, 19, 1956, 7414, 5663, 5045, 867, 925, 8764, 1499, 3949, 151888, 5829, 4092, 2041, 4014, 6714, 2043, 914, 351, 1398, 7430, 5335, 4624, 3667, 567, 3932, 999	117	3777	12782	1.73547	0.000323594	8.09082e-05	0.00145395
GOTERM_BP_FAT	GO:0006917~induction of apoptosis	15	12	1.10826e-06	8517, 841, 5599, 914, 5663, 2071, 7316, 7157, 351, 8772, 8737, 8878, 3932, 6654, 5594	123	320	13528	5.15549	0.00231689	2.93614e-05	0.00191554
GOTERM_BP_FAT	GO:0012502~induction of programmed cell death	15	12	1.15007e-06	8517, 841, 5599, 914, 5663, 2071, 7316, 7157, 351, 8772, 8737, 8878, 3932, 6654, 5594	123	321	13528	5.13943	0.00240421	3.00883e-05	0.00198782
GOTERM_BP_FAT	GO:0031329~regulation of cellular catabolic process	8	6.4	1.18925e-06	3458, 3091, 3667, 7076, 5045, 3553, 345, 4092	123	61	13528	14.4241	0.00248601	3.07292e-05	0.00205554
GOTERM_BP_FAT	GO:0006928~cell motion	18	14.4	1.20412e-06	338, 6714, 2064, 6273, 5599, 6774, 2043, 7414, 3091, 5663, 3791, 7316, 335, 351, 3458, 7168, 3553, 5159	123	475	13528	4.1678	0.00251705	3.0734e-05	0.00208123
GOTERM_MF_FAT	GO:0004672~protein kinase activity	20	16	1.2356e-06	595, 2041, 6714, 2064, 5599, 5894, 1956, 4216, 2043, 2932, 3791, 2071, 5394, 1399, 1022, 8737, 3667, 3932, 5594, 5159	115	606	12983	3.72593	0.000460773	9.21716e-05	0.00170587
GOTERM_BP_FAT	GO:0048545~response to steroid hormone stimulus	12	9.6	1.25996e-06	595, 3949, 2064, 6714, 6774, 760, 2033, 5970, 3553, 2099, 1499, 5594	123	192	13528	6.87398	0.00263362	3.17717e-05	0.00217775
GOTERM_BP_FAT	GO:0042129~regulation of T cell proliferation	8	6.4	1.33067e-06	3458, 2064, 3606, 3553, 151888, 8764, 5788, 3558	123	62	13528	14.1915	0.00278121	3.31552e-05	0.00229996
GOTERM_MF_FAT	GO:0003690~double-stranded DNA binding	9	7.2	2.08272e-06	3725, 1956, 2073, 5111, 6935, 7157, 4904, 1499, 4087	115	97	12983	10.4749	0.000776553	0.000129467	0.00287539
GOTERM_BP_FAT	GO:0009894~regulation of catabolic process	9	7.2	2.37439e-06	3458, 5970, 3091, 3667, 7076, 5045, 3553, 345, 4092	123	96	13528	10.311	0.00495727	5.84641e-05	0.00410392
GOTERM_BP_FAT	GO:0010035~response to inorganic substance	12	9.6	2.39213e-06	3725, 595, 338, 7168, 5599, 760, 682, 1956, 2033, 5970, 5829, 1499	123	205	13528	6.43807	0.00499422	5.82162e-05	0.00413459
GOTERM_BP_FAT	GO:0006916~anti-apoptosis	12	9.6	2.50802e-06	5290, 4615, 5970, 8878, 2932, 5663, 7316, 3553, 4790, 2099, 4792, 3558	123	206	13528	6.40682	0.00523554	6.03348e-05	0.00433488
GOTERM_BP_FAT	GO:0010627~regulation of protein kinase cascade	13	10.4	2.51263e-06	2064, 841, 5970, 7132, 1499, 4615, 3458, 8772, 8737, 8878, 3553, 5788, 3558	123	249	13528	5.74212	0.00524514	5.97589e-05	0.00434286
GOTERM_BP_FAT	GO:0002521~leukocyte differentiation	10	8	2.75399e-06	920, 841, 4318, 5663, 925, 3932, 7157, 5788, 1499, 3558	123	131	13528	8.39571	0.00574752	6.47631e-05	0.00476001
GOTERM_BP_FAT	GO:0030334~regulation of cell migration	11	8.8	2.93323e-06	7168, 4318, 1956, 3091, 7414, 3667, 3791, 5045, 4092, 5159, 5594	123	169	13528	7.1587	0.00612045	6.82117e-05	0.00506981
GOTERM_CC_FAT	GO:0005667~transcription factor complex	12	9.6	3.15282e-06	3725, 1022, 2033, 5970, 3091, 2071, 2073, 6935, 4092, 7157, 1499, 4087	117	210	12782	6.24274	0.000935952	0.00018726	0.00420659
GOTERM_CC_FAT	GO:0005654~nucleoplasm	24	19.2	3.52208e-06	3725, 595, 4014, 5599, 6635, 2033, 6634, 5970, 3091, 2071, 7316, 2073, 7508, 7157, 1499, 1022, 5887, 8878, 5111, 4790, 6935, 4092, 5594, 4087	117	882	12782	2.97273	0.00104551	0.000174328	0.00469925
GOTERM_BP_FAT	GO:0043406~positive regulation of MAP kinase activity	9	7.2	3.75397e-06	2064, 5781, 1956, 8737, 6464, 5663, 3553, 5788, 1942	123	102	13528	9.70445	0.00782629	8.63377e-05	0.00648833
GOTERM_BP_FAT	GO:0048534~hemopoietic or lymphoid organ development	13	10.4	3.92887e-06	920, 841, 4318, 3791, 5663, 925, 7157, 1499, 1399, 7076, 3932, 5788, 3558	123	260	13528	5.49919	0.00818943	8.9378e-05	0.00679062
GOTERM_BP_FAT	GO:0009416~response to light stimulus	10	8	4.23492e-06	595, 3265, 5599, 1956, 5970, 2071, 2073, 7508, 7157, 351	123	138	13528	7.96984	0.00882453	9.53041e-05	0.00731957
GOTERM_BP_FAT	GO:0051291~protein heterooligomerization	7	5.6	6.89667e-06	3265, 841, 8772, 2885, 3667, 7132, 1499	123	52	13528	14.8055	0.0143311	0.00015355	0.0119198
GOTERM_BP_FAT	GO:0034097~response to cytokine stimulus	8	6.4	6.91117e-06	3725, 4615, 6714, 841, 6774, 8737, 5970, 1499	123	79	13528	11.1376	0.014361	0.000152253	0.0119449
GOTERM_BP_FAT	GO:0051248~negative regulation of protein metabolic process	11	8.8	7.23379e-06	3725, 5970, 5663, 5710, 7076, 5045, 7316, 4790, 4092, 5788, 3558	123	187	13528	6.46963	0.0150263	0.0001577	0.0125025
GOTERM_BP_FAT	GO:0002520~immune system development	13	10.4	7.23534e-06	920, 841, 4318, 3791, 5663, 925, 7157, 1499, 1399, 7076, 3932, 5788, 3558	123	276	13528	5.18039	0.0150295	0.000156108	0.0125051
GOTERM_BP_FAT	GO:0006357~regulation of transcription from RNA polymerase II promoter	21	16.8	7.35016e-06	3725, 6774, 2033, 4851, 5970, 3091, 2071, 7157, 1499, 7132, 351, 1398, 1022, 8878, 4790, 4792, 10062, 6935, 4092, 3558, 4087	123	727	13528	3.17697	0.0152662	0.000156967	0.0127036
GOTERM_BP_FAT	GO:0051094~positive regulation of developmental process	13	10.4	7.78535e-06	3725, 338, 760, 4851, 5970, 3091, 7132, 1499, 3553, 4790, 5788, 4087, 3558	123	278	13528	5.14312	0.0161628	0.00016458	0.0134557
GOTERM_BP_FAT	GO:0043009~chordate embryonic development	14	11.2	8.89025e-06	338, 841, 2033, 3091, 5663, 7157, 7168, 5335, 4624, 4904, 6935, 5159, 4087, 999	123	331	13528	4.65188	0.0184353	0.000186056	0.0153652
GOTERM_BP_FAT	GO:0040012~regulation of locomotion	11	8.8	9.1279e-06	7168, 4318, 1956, 3091, 7414, 3667, 3791, 5045, 4092, 5159, 5594	123	192	13528	6.30115	0.0189234	0.000189138	0.0157759
GOTERM_BP_FAT	GO:0030097~hemopoiesis	12	9.6	9.23511e-06	920, 841, 4318, 5663, 3791, 7076, 925, 3932, 7157, 5788, 1499, 3558	123	236	13528	5.59239	0.0191436	0.000189484	0.0159612
GOTERM_BP_FAT	GO:0051270~regulation of cell motion	11	8.8	9.55423e-06	7168, 4318, 1956, 3091, 7414, 3667, 3791, 5045, 4092, 5159, 5594	123	193	13528	6.2685	0.0197985	0.000194128	0.0165127
GOTERM_BP_FAT	GO:0006289~nucleotide-excision repair	7	5.6	9.60648e-06	1022, 5887, 2071, 2073, 5111, 7508, 7157	123	55	13528	13.9979	0.0199057	0.000193313	0.016603
GOTERM_BP_FAT	GO:0050670~regulation of lymphocyte proliferation	8	6.4	9.60882e-06	3458, 2064, 3606, 3553, 151888, 8764, 5788, 3558	123	83	13528	10.6008	0.0199105	0.000191518	0.016607
GOTERM_BP_FAT	GO:0009792~embryonic development ending in birth or egg hatching	14	11.2	9.79335e-06	338, 841, 2033, 3091, 5663, 7157, 7168, 5335, 4624, 4904, 6935, 5159, 4087, 999	123	334	13528	4.6101	0.0202889	0.000193355	0.0169259
GOTERM_MF_FAT	GO:0010843~promoter binding	7	5.6	1.0119e-05	3725, 4790, 2099, 4092, 7157, 1499, 4087	115	57	12983	13.8644	0.0037673	0.000539057	0.0139696
GOTERM_BP_FAT	GO:0032944~regulation of mononuclear cell proliferation	8	6.4	1.04047e-05	3458, 2064, 3606, 3553, 151888, 8764, 5788, 3558	123	84	13528	10.4746	0.0215417	0.000203504	0.0179824
GOTERM_BP_FAT	GO:0070663~regulation of leukocyte proliferation	8	6.4	1.04047e-05	3458, 2064, 3606, 3553, 151888, 8764, 5788, 3558	123	84	13528	10.4746	0.0215417	0.000203504	0.0179824
GOTERM_BP_FAT	GO:0002237~response to molecule of bacterial origin	8	6.4	1.21609e-05	3725, 4615, 5970, 567, 3553, 4792, 7132, 5594	123	86	13528	10.231	0.0251318	0.000235648	0.0210174
GOTERM_BP_FAT	GO:0000060~protein import into nucleus, translocation	6	4.8	1.23996e-05	3725, 3458, 4792, 9372, 7157, 5594	123	34	13528	19.4089	0.0256186	0.000238068	0.0214298
GOTERM_BP_FAT	GO:0009314~response to radiation	11	8.8	1.30502e-05	595, 3265, 5599, 1956, 5970, 2071, 2073, 7508, 7157, 5788, 351	123	200	13528	6.04911	0.0269446	0.00024828	0.0225542
GOTERM_MF_FAT	GO:0004713~protein tyrosine kinase activity	10	8	1.51209e-05	2041, 2064, 6714, 1399, 1956, 2043, 3667, 3791, 3932, 5159	115	166	12983	6.80094	0.00562426	0.000704768	0.0208741
GOTERM_BP_FAT	GO:0030335~positive regulation of cell migration	8	6.4	1.52506e-05	4318, 1956, 3091, 3667, 3791, 5045, 5159, 5594	123	89	13528	9.88618	0.0314156	0.000287523	0.0263565
GOTERM_BP_FAT	GO:0031331~positive regulation of cellular catabolic process	6	4.8	1.65591e-05	3458, 3091, 3667, 5045, 3553, 4092	123	36	13528	18.3306	0.0340648	0.000309403	0.0286177
GOTERM_BP_FAT	GO:0042110~T cell activation	9	7.2	1.79598e-05	920, 914, 5663, 925, 3932, 7157, 5788, 1499, 3558	123	126	13528	7.85598	0.0368925	0.000332602	0.031038
GOTERM_BP_FAT	GO:0007507~heart development	11	8.8	2.44076e-05	2064, 841, 1399, 7168, 4624, 2033, 4851, 5663, 4092, 1499, 4087	123	215	13528	5.62708	0.0498028	0.00044802	0.0421788
GOTERM_BP_FAT	GO:0042493~response to drug	11	8.8	2.53998e-05	3725, 595, 2064, 6774, 6548, 2033, 5970, 3553, 3932, 7157, 999	123	216	13528	5.60102	0.0517741	0.000462176	0.0438932
GOTERM_BP_FAT	GO:0045596~negative regulation of cell differentiation	11	8.8	2.53998e-05	595, 19, 4851, 5663, 4792, 10062, 6935, 4092, 7157, 1499, 5594	123	216	13528	5.60102	0.0517741	0.000462176	0.0438932
GOTERM_BP_FAT	GO:0030217~T cell differentiation	7	5.6	2.54337e-05	920, 925, 3932, 7157, 5788, 1499, 3558	123	65	13528	11.8444	0.0518413	0.000458803	0.0439516
GOTERM_MF_FAT	GO:0004714~transmembrane receptor protein tyrosine kinase activity	7	5.6	2.59148e-05	2041, 2064, 1956, 2043, 3667, 3791, 5159	115	67	12983	11.7951	0.00961976	0.00107346	0.0357724
GOTERM_BP_FAT	GO:0042327~positive regulation of phosphorylation	8	6.4	2.67923e-05	595, 920, 3458, 1956, 5663, 3553, 8764, 3558	123	97	13528	9.07082	0.0545336	0.000479176	0.0462989
GOTERM_BP_FAT	GO:0032374~regulation of cholesterol transport	5	4	2.72796e-05	4790, 345, 4792, 10062, 335	123	20	13528	27.4959	0.0554975	0.000483755	0.0471408
GOTERM_BP_FAT	GO:0032371~regulation of sterol transport	5	4	2.72796e-05	4790, 345, 4792, 10062, 335	123	20	13528	27.4959	0.0554975	0.000483755	0.0471408
GOTERM_BP_FAT	GO:0032583~regulation of gene-specific transcription	9	7.2	2.80639e-05	4851, 3091, 4790, 4792, 10062, 4092, 7157, 1499, 4087	123	134	13528	7.38697	0.0570468	0.00049348	0.0484959
GOTERM_BP_FAT	GO:0040017~positive regulation of locomotion	8	6.4	2.86397e-05	4318, 1956, 3091, 3667, 3791, 5045, 5159, 5594	123	98	13528	8.97826	0.0581825	0.000499406	0.0494906
GOTERM_BP_FAT	GO:0051272~positive regulation of cell motion	8	6.4	2.86397e-05	4318, 1956, 3091, 3667, 3791, 5045, 5159, 5594	123	98	13528	8.97826	0.0581825	0.000499406	0.0494906
GOTERM_BP_FAT	GO:0001701~in utero embryonic development	10	8	3.0106e-05	338, 7168, 5335, 4624, 3091, 7157, 4904, 5159, 999, 4087	123	176	13528	6.24908	0.0610686	0.000520631	0.0520238
GOTERM_BP_FAT	GO:0010562~positive regulation of phosphorus metabolic process	8	6.4	3.26499e-05	595, 920, 3458, 1956, 5663, 3553, 8764, 3558	123	100	13528	8.7987	0.0660546	0.000559985	0.0564185
GOTERM_BP_FAT	GO:0045937~positive regulation of phosphate metabolic process	8	6.4	3.26499e-05	595, 920, 3458, 1956, 5663, 3553, 8764, 3558	123	100	13528	8.7987	0.0660546	0.000559985	0.0564185
GOTERM_BP_FAT	GO:0050730~regulation of peptidyl-tyrosine phosphorylation	7	5.6	3.29689e-05	920, 3458, 1956, 8764, 5788, 5159, 3558	123	68	13528	11.3219	0.0666781	0.00056086	0.0569697
GOTERM_MF_FAT	GO:0008022~protein C-terminus binding	9	7.2	3.31368e-05	3265, 2064, 6714, 1022, 9368, 2033, 2071, 3932, 1499	115	141	12983	7.20611	0.0122841	0.00123526	0.0457394
GOTERM_MF_FAT	GO:0019904~protein domain specific binding	13	10.4	3.32117e-05	6714, 5781, 9368, 5663, 867, 1398, 2885, 8737, 8878, 3667, 3553, 3932, 6654	115	331	12983	4.43397	0.0123118	0.00112556	0.0458429
GOTERM_BP_FAT	GO:0010883~regulation of lipid storage	5	4	3.3464e-05	338, 19, 4790, 4792, 10062	123	21	13528	26.1866	0.0676447	0.000564689	0.0578249
GOTERM_BP_FAT	GO:0021700~developmental maturation	8	6.4	3.48217e-05	1003, 4313, 4851, 5663, 3791, 7076, 351, 1499	123	101	13528	8.71158	0.0702904	0.000582894	0.0601703
GOTERM_BP_FAT	GO:0002768~immune response-regulating cell surface receptor signaling pathway	6	4.8	3.57853e-05	8517, 930, 5663, 151888, 5788, 5594	123	42	13528	15.712	0.0721638	0.000594268	0.061835
GOTERM_BP_FAT	GO:0032269~negative regulation of cellular protein metabolic process	10	8	3.59299e-05	3725, 5663, 5710, 7076, 5045, 7316, 4790, 4092, 5788, 3558	123	180	13528	6.11021	0.0724444	0.000591971	0.0620846
GOTERM_BP_FAT	GO:0001817~regulation of cytokine production	10	8	3.75264e-05	920, 4615, 3458, 5970, 3606, 3091, 5045, 3553, 4790, 335	123	181	13528	6.07645	0.0755388	0.000613439	0.0648425
GOTERM_BP_FAT	GO:0008283~cell proliferation	15	12	3.78358e-05	6714, 2064, 2006, 1296, 5894, 1956, 5663, 5045, 7157, 335, 1499, 1022, 5111, 5788, 6935	123	436	13528	3.78384	0.0761374	0.000613702	0.065377
GOTERM_BP_FAT	GO:0048011~nerve growth factor receptor signaling pathway	4	3.2	3.87743e-05	6714, 5781, 5894, 6654	123	8	13528	54.9919	0.0779504	0.000624084	0.0669981
GOTERM_BP_FAT	GO:0043405~regulation of MAP kinase activity	9	7.2	4.04556e-05	2064, 5781, 1956, 8737, 6464, 5663, 3553, 5788, 1942	123	141	13528	7.02024	0.0811894	0.000646168	0.0699023
GOTERM_BP_FAT	GO:0000718~nucleotide-excision repair, DNA damage removal	5	4	4.06161e-05	1022, 5887, 2071, 2073, 7508	123	22	13528	24.9963	0.081498	0.000643817	0.0701794
GOTERM_BP_FAT	GO:0043086~negative regulation of catalytic activity	12	9.6	4.0864e-05	4616, 1647, 5663, 5710, 7316, 3553, 4790, 345, 4092, 7157, 5788, 335	123	277	13528	4.76464	0.0819744	0.000642876	0.0706076
GOTERM_BP_FAT	GO:0045597~positive regulation of cell differentiation	11	8.8	4.18116e-05	3725, 338, 760, 5970, 4851, 3091, 4790, 5788, 1499, 3558, 4087	123	229	13528	5.28306	0.0837935	0.000652873	0.0722445
GOTERM_BP_FAT	GO:0051726~regulation of cell cycle	13	10.4	4.39825e-05	595, 3725, 5781, 1956, 2071, 7508, 7157, 351, 4616, 1022, 1647, 3553, 5788	123	331	13528	4.3196	0.0879472	0.000681674	0.0759941
GOTERM_BP_FAT	GO:0043627~response to estrogen stimulus	8	6.4	4.4732e-05	595, 3949, 6774, 760, 3553, 2099, 1499, 5594	123	105	13528	8.37971	0.0893769	0.000688191	0.0772887
GOTERM_BP_FAT	GO:0002696~positive regulation of leukocyte activation	8	6.4	4.75406e-05	920, 3458, 3606, 914, 3553, 3932, 5788, 3558	123	106	13528	8.30066	0.0947145	0.000726049	0.0821396
GOTERM_BP_FAT	GO:0044092~negative regulation of molecular function	13	10.4	4.79986e-05	5710, 5663, 7316, 345, 7157, 335, 4616, 1647, 3553, 4790, 4792, 5788, 4092	123	334	13528	4.2808	0.0955819	0.000727731	0.0829305
GOTERM_BP_FAT	GO:0006461~protein complex assembly	16	12.8	4.82022e-05	3265, 6714, 841, 9368, 2071, 7157, 9372, 7132, 1499, 1022, 8772, 2885, 3667, 5829, 999, 4087	123	505	13528	3.48463	0.0959672	0.000725561	0.0832821
GOTERM_BP_FAT	GO:0070271~protein complex biogenesis	16	12.8	4.82022e-05	3265, 6714, 841, 9368, 2071, 7157, 9372, 7132, 1499, 1022, 8772, 2885, 3667, 5829, 999, 4087	123	505	13528	3.48463	0.0959672	0.000725561	0.0832821
GOTERM_BP_FAT	GO:0043122~regulation of I-kappaB kinase/NF-kappaB cascade	8	6.4	5.04923e-05	4615, 841, 8772, 8737, 5970, 8878, 3553, 7132	123	107	13528	8.22308	0.10029	0.000754594	0.0872372
GOTERM_CC_FAT	GO:0043233~organelle lumen	34	27.2	5.06316e-05	3725, 920, 841, 338, 5599, 6635, 6774, 2033, 6634, 5970, 2071, 2073, 118460, 335, 1499, 5887, 8878, 5111, 4092, 595, 4014, 3091, 7316, 7508, 7157, 351, 5394, 1022, 4624, 7076, 4790, 6935, 5594, 4087	117	1820	12782	2.04089	0.0149255	0.00214598	0.0675343
GOTERM_MF_FAT	GO:0042169~SH2 domain binding	5	4	5.23152e-05	1398, 6714, 8878, 3667, 3932	115	24	12983	23.5199	0.0193249	0.00162485	0.0722029
GOTERM_BP_FAT	GO:0050870~positive regulation of T cell activation	7	5.6	6.20995e-05	920, 3458, 3606, 3553, 3932, 5788, 3558	123	76	13528	10.1301	0.121885	0.000921406	0.107281
GOTERM_BP_FAT	GO:0050867~positive regulation of cell activation	8	6.4	6.38419e-05	920, 3458, 3606, 914, 3553, 3932, 5788, 3558	123	111	13528	7.92676	0.125082	0.000940581	0.11029
GOTERM_BP_FAT	GO:0032496~response to lipopolysaccharide	7	5.6	6.68555e-05	3725, 4615, 5970, 3553, 4792, 7132, 5594	123	77	13528	9.99852	0.130584	0.000978076	0.115493
GOTERM_BP_FAT	GO:0019216~regulation of lipid metabolic process	8	6.4	6.75946e-05	3458, 338, 3667, 3553, 4790, 345, 10062, 335	123	112	13528	7.85598	0.131928	0.000982019	0.116769
GOTERM_BP_FAT	GO:0010743~regulation of foam cell differentiation	5	4	6.87842e-05	338, 19, 4790, 4792, 10062	123	25	13528	21.9967	0.134087	0.000992406	0.118823
GOTERM_BP_FAT	GO:0045862~positive regulation of proteolysis	5	4	6.87842e-05	3458, 2033, 5045, 3553, 4092	123	25	13528	21.9967	0.134087	0.000992406	0.118823
GOTERM_BP_FAT	GO:0032768~regulation of monooxygenase activity	5	4	6.87842e-05	3458, 1956, 3091, 3553, 4790	123	25	13528	21.9967	0.134087	0.000992406	0.118823
GOTERM_BP_FAT	GO:0051098~regulation of binding	9	7.2	7.22373e-05	4615, 8737, 2033, 5970, 5663, 3553, 4792, 4092, 4087	123	153	13528	6.46963	0.140323	0.00103507	0.124785
GOTERM_CC_FAT	GO:0031974~membrane-enclosed lumen	34	27.2	7.49815e-05	3725, 920, 841, 338, 5599, 6635, 6774, 2033, 6634, 5970, 2071, 2073, 118460, 335, 1499, 5887, 8878, 5111, 4092, 595, 4014, 3091, 7316, 7508, 7157, 351, 5394, 1022, 4624, 7076, 4790, 6935, 5594, 4087	117	1856	12782	2.00131	0.0220242	0.00277992	0.0999981
GOTERM_BP_FAT	GO:0051052~regulation of DNA metabolic process	8	6.4	7.56416e-05	3725, 3265, 3458, 6464, 5111, 7157, 5788, 3558	123	114	13528	7.71816	0.146427	0.00107645	0.130662
GOTERM_BP_FAT	GO:0051223~regulation of protein transport	8	6.4	7.56416e-05	3458, 5781, 2932, 3553, 4792, 999, 335, 3558	123	114	13528	7.71816	0.146427	0.00107645	0.130662
GOTERM_CC_FAT	GO:0031981~nuclear lumen	29	23.2	7.58145e-05	3725, 841, 5599, 6635, 6774, 2033, 6634, 5970, 2071, 2073, 118460, 1499, 5887, 8878, 5111, 4092, 595, 4014, 3091, 7316, 7508, 7157, 5394, 1022, 4624, 4790, 6935, 4087, 5594	117	1450	12782	2.18496	0.0222661	0.00249885	0.101108
GOTERM_BP_FAT	GO:0009896~positive regulation of catabolic process	6	4.8	7.6279e-05	3458, 3091, 3667, 5045, 3553, 4092	123	49	13528	13.4674	0.147565	0.00107819	0.131762
GOTERM_MF_FAT	GO:0046983~protein dimerization activity	16	12.8	7.68983e-05	3725, 920, 338, 2064, 8517, 6774, 1956, 914, 3091, 10533, 925, 2073, 7157, 1380, 4624, 4790	115	542	12983	3.33271	0.0282767	0.00220404	0.106115
GOTERM_BP_FAT	GO:0044265~cellular macromolecule catabolic process	19	15.2	8.46843e-05	84557, 338, 841, 5970, 5663, 8945, 10533, 5710, 2071, 7316, 867, 2073, 7508, 3949, 5394, 1022, 5887, 8878, 4790	123	725	13528	2.88233	0.162431	0.0011889	0.146271
GOTERM_CC_FAT	GO:0016323~basolateral plasma membrane	10	8	9.47386e-05	2064, 760, 4624, 6548, 1956, 7414, 5829, 5788, 999, 1499	117	203	12782	5.38167	0.0277465	0.00280991	0.126331
GOTERM_BP_FAT	GO:0042176~regulation of protein catabolic process	6	4.8	0.000101746	3458, 5970, 7076, 5045, 3553, 4092	123	52	13528	12.6904	0.191816	0.00141876	0.175717
GOTERM_BP_FAT	GO:0007173~epidermal growth factor receptor signaling pathway	5	4	0.000109029	6714, 2885, 1956, 6464, 867	123	28	13528	19.64	0.204044	0.00151019	0.188284
GOTERM_BP_FAT	GO:0044057~regulation of system process	12	9.6	0.000109045	3265, 3458, 7168, 5781, 4624, 1956, 5663, 7316, 3553, 4092, 335, 3558	123	309	13528	4.27121	0.204069	0.00150047	0.188311
GOTERM_BP_FAT	GO:0070201~regulation of establishment of protein localization	8	6.4	0.0001102	3458, 5781, 2932, 3553, 4792, 999, 335, 3558	123	121	13528	7.27165	0.205992	0.00150646	0.190304
GOTERM_BP_FAT	GO:0001889~liver development	6	4.8	0.00011154	595, 2064, 2033, 5970, 4851, 1499	123	53	13528	12.451	0.208216	0.00151487	0.192616
GOTERM_BP_FAT	GO:0030162~regulation of proteolysis	6	4.8	0.00011154	3458, 2033, 7076, 5045, 3553, 4092	123	53	13528	12.451	0.208216	0.00151487	0.192616
GOTERM_BP_FAT	GO:0006979~response to oxidative stress	9	7.2	0.000117424	3725, 7168, 1956, 2033, 5970, 3091, 5663, 2071, 5829	123	164	13528	6.03569	0.217908	0.00158444	0.202767
GOTERM_BP_FAT	GO:0048514~blood vessel morphogenesis	10	8	0.000122578	3725, 338, 841, 3606, 4851, 3091, 3791, 3553, 4092, 1499	123	211	13528	5.2125	0.2263	0.00164334	0.211658
GOTERM_BP_FAT	GO:0043193~positive regulation of gene-specific transcription	7	5.6	0.000132337	4851, 3091, 4792, 10062, 7157, 1499, 4087	123	87	13528	8.84927	0.241946	0.00176278	0.228491
GOTERM_BP_FAT	GO:0060537~muscle tissue development	8	6.4	0.000135107	2064, 2006, 7168, 4624, 2033, 4092, 351, 5159	123	125	13528	7.03896	0.246327	0.00178825	0.233267
GOTERM_MF_FAT	GO:0042802~identical protein binding	17	13.6	0.000143438	920, 2064, 841, 1956, 5970, 914, 10533, 925, 2073, 1380, 335, 351, 5394, 8772, 4624, 4790, 4792	115	640	12983	2.99879	0.0520999	0.00381457	0.197851
GOTERM_BP_FAT	GO:0032368~regulation of lipid transport	5	4	0.000143913	4790, 345, 4792, 10062, 335	123	30	13528	18.3306	0.260094	0.00189275	0.248455
GOTERM_BP_FAT	GO:0051054~positive regulation of DNA metabolic process	6	4.8	0.000145306	3725, 3265, 3458, 6464, 5788, 3558	123	56	13528	11.784	0.262248	0.00189912	0.250856
GOTERM_BP_FAT	GO:0034377~plasma lipoprotein particle assembly	4	3.2	0.000148356	338, 19, 345, 335	123	12	13528	36.6612	0.266944	0.00192692	0.256116
GOTERM_BP_FAT	GO:0065005~protein-lipid complex assembly	4	3.2	0.000148356	338, 19, 345, 335	123	12	13528	36.6612	0.266944	0.00192692	0.256116
GOTERM_BP_FAT	GO:0001934~positive regulation of protein amino acid phosphorylation	7	5.6	0.000150074	595, 920, 3458, 5663, 3553, 8764, 3558	123	89	13528	8.65041	0.269575	0.00193719	0.259078
GOTERM_MF_FAT	GO:0008134~transcription factor binding	15	12	0.000157107	3725, 6774, 6548, 2033, 5970, 3091, 2932, 2071, 7157, 1499, 1022, 10062, 4792, 6935, 4087	115	513	12983	3.30104	0.0569213	0.00389941	0.216686
GOTERM_BP_FAT	GO:0010038~response to metal ion	8	6.4	0.0001644	595, 338, 5599, 760, 682, 1956, 2033, 1499	123	129	13528	6.8207	0.291154	0.00210892	0.283776
GOTERM_BP_FAT	GO:0051259~protein oligomerization	9	7.2	0.000176738	3265, 841, 8772, 2885, 3667, 7157, 7132, 999, 1499	123	174	13528	5.68881	0.309228	0.00225322	0.305043
GOTERM_BP_FAT	GO:0051050~positive regulation of transport	10	8	0.000186008	3458, 5781, 2932, 3667, 867, 3553, 4792, 10062, 999, 3558	123	223	13528	4.93201	0.322504	0.00235693	0.321019
GOTERM_BP_FAT	GO:0001933~negative regulation of protein amino acid phosphorylation	5	4	0.000186228	3725, 5663, 4092, 5788, 3558	123	32	13528	17.185	0.322816	0.00234551	0.321397
GOTERM_BP_FAT	GO:0051043~regulation of membrane protein ectodomain proteolysis	4	3.2	0.000191595	3458, 7076, 5045, 3553	123	13	13528	33.8412	0.330381	0.0023986	0.330646
GOTERM_CC_FAT	GO:0070013~intracellular organelle lumen	32	25.6	0.000194003	3725, 920, 841, 338, 5599, 6635, 6774, 2033, 6634, 5970, 2071, 2073, 118460, 1499, 335, 5887, 8878, 5111, 4092, 595, 4014, 3091, 7316, 7508, 7157, 5394, 1022, 4624, 4790, 6935, 5594, 4087	117	1779	12782	1.96511	0.0559956	0.00522489	0.258539
GOTERM_BP_FAT	GO:0010551~regulation of specific transcription from RNA polymerase II promoter	7	5.6	0.000202722	4851, 4790, 4792, 10062, 4092, 7157, 1499	123	94	13528	8.19028	0.345799	0.00252265	0.349816
GOTERM_BP_FAT	GO:0050851~antigen receptor-mediated signaling pathway	5	4	0.000210445	8517, 930, 5663, 5788, 5594	123	33	13528	16.6642	0.356291	0.00260317	0.363121
GOTERM_BP_FAT	GO:0009057~macromolecule catabolic process	19	15.2	0.000215025	84557, 338, 841, 5970, 5663, 8945, 10533, 5710, 2071, 7316, 867, 2073, 7508, 3949, 5394, 1022, 5887, 8878, 4790	123	781	13528	2.67566	0.362433	0.00264412	0.371009
GOTERM_BP_FAT	GO:0043123~positive regulation of I-kappaB kinase/NF-kappaB cascade	7	5.6	0.000240694	4615, 841, 8772, 8737, 5970, 3553, 7132	123	97	13528	7.93697	0.39579	0.00294206	0.415212
GOTERM_BP_FAT	GO:0051251~positive regulation of lymphocyte activation	7	5.6	0.000240694	920, 3458, 3606, 3553, 3932, 5788, 3558	123	97	13528	7.93697	0.39579	0.00294206	0.415212
GOTERM_BP_FAT	GO:0032880~regulation of protein localization	8	6.4	0.00024931	3458, 5781, 2932, 3553, 4792, 999, 335, 3558	123	138	13528	6.37587	0.40659	0.00302953	0.430045
GOTERM_BP_FAT	GO:0001775~cell activation	11	8.8	0.000268745	920, 3937, 1956, 914, 5663, 925, 3932, 7157, 5788, 1499, 3558	123	287	13528	4.2154	0.43025	0.0032465	0.463495
GOTERM_CC_FAT	GO:0005902~microvillus	5	4	0.000303154	7430, 2064, 760, 9368, 1499	117	36	12782	15.1733	0.086115	0.00747612	0.403729
GOTERM_BP_FAT	GO:0050801~ion homeostasis	13	10.4	0.000320838	3725, 2064, 9368, 6548, 3791, 5663, 7157, 351, 3553, 3932, 5788, 4092, 3558	123	409	13528	3.49582	0.489121	0.00385246	0.553105
GOTERM_MF_FAT	GO:0032403~protein complex binding	9	7.2	0.000328415	595, 5781, 6464, 5970, 3667, 5111, 4792, 4092, 7132	115	196	12983	5.18398	0.115311	0.00762818	0.452462
GOTERM_BP_FAT	GO:0009895~negative regulation of catabolic process	5	4	0.000330343	5970, 7076, 5045, 3553, 345	123	37	13528	14.8627	0.499186	0.00394375	0.569446
GOTERM_BP_FAT	GO:0015918~sterol transport	5	4	0.000330343	3949, 338, 19, 345, 335	123	37	13528	14.8627	0.499186	0.00394375	0.569446
GOTERM_BP_FAT	GO:0030301~cholesterol transport	5	4	0.000330343	3949, 338, 19, 345, 335	123	37	13528	14.8627	0.499186	0.00394375	0.569446
GOTERM_BP_FAT	GO:0051090~regulation of transcription factor activity	7	5.6	0.000333329	4615, 8737, 2033, 5970, 3553, 4792, 4092	123	103	13528	7.47462	0.502308	0.00395678	0.57458
GOTERM_BP_FAT	GO:0030098~lymphocyte differentiation	7	5.6	0.000333329	920, 925, 3932, 7157, 5788, 1499, 3558	123	103	13528	7.47462	0.502308	0.00395678	0.57458
GOTERM_BP_FAT	GO:0045321~leukocyte activation	10	8	0.000341018	920, 3937, 914, 5663, 925, 3932, 7157, 5788, 1499, 3558	123	242	13528	4.54478	0.510256	0.00402505	0.587796
GOTERM_BP_FAT	GO:0009617~response to bacterium	9	7.2	0.000357141	3725, 4615, 3458, 5970, 567, 3553, 4792, 7132, 5594	123	193	13528	5.12878	0.526512	0.00419135	0.615506
GOTERM_BP_FAT	GO:0051240~positive regulation of multicellular organismal process	10	8	0.000362215	4615, 3458, 7168, 760, 1956, 3606, 3091, 5663, 7316, 3553	123	244	13528	4.50753	0.531516	0.00422709	0.624225
GOTERM_MF_FAT	GO:0019903~protein phosphatase binding	5	4	0.000365892	1003, 2064, 1956, 999, 1499	115	39	12983	14.4738	0.127596	0.00799741	0.503974
GOTERM_BP_FAT	GO:0055092~sterol homeostasis	5	4	0.00036665	3949, 338, 19, 345, 335	123	38	13528	14.4715	0.535846	0.00425502	0.631845
GOTERM_BP_FAT	GO:0042632~cholesterol homeostasis	5	4	0.00036665	3949, 338, 19, 345, 335	123	38	13528	14.4715	0.535846	0.00425502	0.631845
GOTERM_BP_FAT	GO:0034381~lipoprotein particle clearance	4	3.2	0.000367805	3949, 338, 345, 335	123	16	13528	27.4959	0.536967	0.00424487	0.63383
GOTERM_BP_FAT	GO:0001525~angiogenesis	8	6.4	0.000381836	3725, 841, 3606, 4851, 3091, 3791, 3553, 1499	123	148	13528	5.94507	0.550372	0.00438232	0.657935
GOTERM_BP_FAT	GO:0042102~positive regulation of T cell proliferation	5	4	0.000405724	3458, 3606, 3553, 5788, 3558	123	39	13528	14.1005	0.572308	0.00463052	0.69896
GOTERM_BP_FAT	GO:0002429~immune response-activating cell surface receptor signaling pathway	5	4	0.000405724	8517, 930, 5663, 5788, 5594	123	39	13528	14.1005	0.572308	0.00463052	0.69896
GOTERM_BP_FAT	GO:0007264~small GTPase mediated signal transduction	11	8.8	0.000435188	3265, 6714, 1399, 2885, 5894, 19, 6464, 345, 6654, 5594, 335	123	305	13528	3.96663	0.597897	0.0049391	0.749539
GOTERM_BP_FAT	GO:0046649~lymphocyte activation	9	7.2	0.000438235	920, 914, 5663, 925, 3932, 7157, 5788, 1499, 3558	123	199	13528	4.97414	0.600454	0.00494679	0.754768
GOTERM_BP_FAT	GO:0051341~regulation of oxidoreductase activity	5	4	0.000447684	3458, 1956, 3091, 3553, 4790	123	40	13528	13.748	0.608282	0.00502611	0.770983
GOTERM_BP_FAT	GO:0000398~nuclear mRNA splicing, via spliceosome	8	6.4	0.000466547	10421, 8175, 6635, 6634, 57819, 10262, 51690, 4904	123	153	13528	5.75078	0.623452	0.00520944	0.803345
GOTERM_BP_FAT	GO:0000375~RNA splicing, via transesterification reactions	8	6.4	0.000466547	10421, 8175, 6635, 6634, 57819, 10262, 51690, 4904	123	153	13528	5.75078	0.623452	0.00520944	0.803345
GOTERM_BP_FAT	GO:0000377~RNA splicing, via transesterification reactions with bulged adenosine as nucleophile	8	6.4	0.000466547	10421, 8175, 6635, 6634, 57819, 10262, 51690, 4904	123	153	13528	5.75078	0.623452	0.00520944	0.803345
GOTERM_BP_FAT	GO:0007568~aging	7	5.6	0.000474429	3725, 3265, 2885, 5970, 3553, 2073, 7157	123	110	13528	6.99897	0.629616	0.00526913	0.816864
GOTERM_MF_FAT	GO:0047485~protein N-terminus binding	6	4.8	0.00047533	5970, 1634, 2071, 2073, 2099, 7157	115	74	12983	9.1537	0.162505	0.00980386	0.654254
GOTERM_BP_FAT	GO:0032488~Cdc42 protein signal transduction	3	2.4	0.000478311	19, 345, 335	123	4	13528	82.4878	0.632615	0.00528411	0.823523
GOTERM_BP_FAT	GO:0008624~induction of apoptosis by extracellular signals	7	5.6	0.000522247	841, 5599, 8772, 8878, 5663, 7316, 6654	123	112	13528	6.87398	0.664908	0.00573794	0.898848
GOTERM_BP_FAT	GO:0006974~response to DNA damage stimulus	12	9.6	0.000549799	595, 1022, 5781, 1647, 5887, 5663, 2071, 2073, 5111, 7508, 7157, 5594	123	373	13528	3.53835	0.683694	0.00600829	0.946054
GOTERM_BP_FAT	GO:0032844~regulation of homeostatic process	7	5.6	0.000573737	3458, 760, 3091, 3932, 4092, 5788, 3558	123	114	13528	6.75339	0.69916	0.0062366	0.987054
GOTERM_MF_FAT	GO:0019902~phosphatase binding	5	4	0.000583858	1003, 2064, 1956, 999, 1499	115	44	12983	12.8291	0.195748	0.0113999	0.803076
GOTERM_BP_FAT	GO:0046626~regulation of insulin receptor signaling pathway	4	3.2	0.000623985	6714, 5970, 3667, 3553	123	19	13528	23.1545	0.729209	0.0067461	1.07306
GOTERM_BP_FAT	GO:0002460~adaptive immune response based on somatic recombination of immune receptors built from immunoglobulin superfamily domains	6	4.8	0.000646568	4615, 1378, 3606, 721, 925, 1380	123	77	13528	8.57016	0.741718	0.00695357	1.11169
GOTERM_BP_FAT	GO:0002250~adaptive immune response	6	4.8	0.000646568	4615, 1378, 3606, 721, 925, 1380	123	77	13528	8.57016	0.741718	0.00695357	1.11169
GOTERM_BP_FAT	GO:0043062~extracellular structure organization	8	6.4	0.000680806	2064, 2006, 1296, 4318, 1634, 351, 999, 1499	123	163	13528	5.39797	0.759591	0.00728315	1.17024
GOTERM_BP_FAT	GO:0042326~negative regulation of phosphorylation	5	4	0.000704976	3725, 5663, 4092, 5788, 3558	123	45	13528	12.2204	0.771458	0.00750251	1.21154
GOTERM_BP_FAT	GO:0046890~regulation of lipid biosynthetic process	5	4	0.000704976	3458, 338, 4790, 345, 10062	123	45	13528	12.2204	0.771458	0.00750251	1.21154
GOTERM_BP_FAT	GO:0014706~striated muscle tissue development	7	5.6	0.000719787	2064, 2006, 7168, 4624, 2033, 4092, 351	123	119	13528	6.46963	0.778439	0.00762084	1.23685
GOTERM_BP_FAT	GO:0031400~negative regulation of protein modification process	7	5.6	0.000719787	3725, 5663, 5710, 7316, 4092, 5788, 3558	123	119	13528	6.46963	0.778439	0.00762084	1.23685
GOTERM_BP_FAT	GO:0001816~cytokine production	5	4	0.000766781	920, 4615, 3937, 19, 3606	123	46	13528	11.9548	0.799208	0.00807574	1.3171
GOTERM_BP_FAT	GO:0045834~positive regulation of lipid metabolic process	5	4	0.000766781	3458, 3667, 3553, 10062, 335	123	46	13528	11.9548	0.799208	0.00807574	1.3171
GOTERM_BP_FAT	GO:0042157~lipoprotein metabolic process	6	4.8	0.000770001	3949, 338, 19, 10533, 345, 335	123	80	13528	8.24878	0.800558	0.00806894	1.32259
GOTERM_BP_FAT	GO:0014070~response to organic cyclic substance	7	5.6	0.000785659	3725, 595, 6774, 6548, 5970, 3553, 1499	123	121	13528	6.3627	0.806993	0.00819142	1.34932
GOTERM_BP_FAT	GO:0051101~regulation of DNA binding	7	5.6	0.000785659	4615, 8737, 2033, 5970, 3553, 4792, 4092	123	121	13528	6.3627	0.806993	0.00819142	1.34932
GOTERM_CC_FAT	GO:0031264~death-inducing signaling complex	3	2.4	0.000802096	841, 8772, 8737	117	5	12782	65.5487	0.212048	0.0181652	1.06492
GOTERM_CC_FAT	GO:0016342~catenin complex	3	2.4	0.000802096	4092, 999, 1499	117	5	12782	65.5487	0.212048	0.0181652	1.06492
GOTERM_BP_FAT	GO:0000187~activation of MAPK activity	6	4.8	0.000861541	5781, 8737, 6464, 3553, 5788, 1942	123	82	13528	8.04759	0.835358	0.00893488	1.47873
GOTERM_BP_FAT	GO:0016337~cell-cell adhesion	10	8	0.000878904	1003, 7430, 6714, 1296, 1956, 914, 5663, 5788, 999, 1499	123	276	13528	3.98492	0.841239	0.00906929	1.50831
GOTERM_BP_FAT	GO:0010563~negative regulation of phosphorus metabolic process	5	4	0.000901712	3725, 5663, 4092, 5788, 3558	123	48	13528	11.4566	0.848646	0.00925803	1.54717
GOTERM_BP_FAT	GO:0045936~negative regulation of phosphate metabolic process	5	4	0.000901712	3725, 5663, 4092, 5788, 3558	123	48	13528	11.4566	0.848646	0.00925803	1.54717
GOTERM_BP_FAT	GO:0008104~protein localization	19	15.2	0.000914431	3725, 338, 19, 1956, 2932, 5663, 10533, 2071, 7157, 9372, 1499, 7430, 3458, 3937, 8878, 5111, 11337, 4792, 5594	123	882	13528	2.36926	0.852626	0.00934226	1.56883
GOTERM_BP_FAT	GO:0032989~cellular component morphogenesis	12	9.6	0.000918905	7430, 2064, 7168, 5781, 4624, 1956, 2043, 4851, 3091, 7316, 351, 1499	123	397	13528	3.32445	0.854001	0.0093422	1.57645
GOTERM_BP_FAT	GO:0051336~regulation of hydrolase activity	11	8.8	0.000940712	3458, 7168, 4624, 1956, 5045, 345, 3932, 10062, 7157, 999, 335	123	337	13528	3.58997	0.86052	0.00951674	1.61357
GOTERM_BP_FAT	GO:0008633~activation of pro-apoptotic gene products	4	3.2	0.000972305	841, 5599, 8772, 8737	123	22	13528	19.997	0.869453	0.00978765	1.66734
GOTERM_BP_FAT	GO:0006606~protein import into nucleus	6	4.8	0.00106866	3725, 3458, 4792, 9372, 7157, 5594	123	86	13528	7.67328	0.893319	0.0107015	1.83114
GOTERM_BP_FAT	GO:0042058~regulation of epidermal growth factor receptor signaling pathway	4	3.2	0.00111083	6464, 5663, 6654, 351	123	23	13528	19.1276	0.902339	0.0110687	1.90273
GOTERM_BP_FAT	GO:0050852~T cell receptor signaling pathway	4	3.2	0.00111083	8517, 5663, 5788, 5594	123	23	13528	19.1276	0.902339	0.0110687	1.90273
GOTERM_BP_FAT	GO:0045580~regulation of T cell differentiation	5	4	0.00113425	2064, 914, 6935, 5788, 3558	123	51	13528	10.7827	0.907017	0.0112474	1.94249
GOTERM_BP_FAT	GO:0055088~lipid homeostasis	5	4	0.00113425	3949, 338, 19, 345, 335	123	51	13528	10.7827	0.907017	0.0112474	1.94249
GOTERM_BP_FAT	GO:0048304~positive regulation of isotype switching to IgG isotypes	3	2.4	0.0011817	3458, 5788, 3558	123	6	13528	54.9919	0.915817	0.0116602	2.02297
GOTERM_BP_FAT	GO:0051170~nuclear import	6	4.8	0.00118508	3725, 3458, 4792, 9372, 7157, 5594	123	88	13528	7.49889	0.916411	0.0116385	2.0287
GOTERM_CC_FAT	GO:0045177~apical part of cell	8	6.4	0.00121544	7430, 2064, 760, 9368, 1956, 351, 999, 1499	117	179	12782	4.88259	0.303164	0.0254704	1.6096
GOTERM_BP_FAT	GO:0048729~tissue morphogenesis	8	6.4	0.00121766	841, 7168, 760, 4624, 4851, 4092, 1499, 4087	123	180	13528	4.88817	0.921927	0.011901	2.08391
GOTERM_CC_FAT	GO:0030532~small nuclear ribonucleoprotein complex	4	3.2	0.0012827	8175, 25804, 6635, 6634	117	24	12782	18.208	0.316964	0.0250936	1.69797
GOTERM_BP_FAT	GO:0043523~regulation of neuron apoptosis	6	4.8	0.00131063	3725, 3265, 5663, 5045, 2099, 7157	123	90	13528	7.33225	0.935749	0.012745	2.24134
GOTERM_BP_FAT	GO:0033157~regulation of intracellular protein transport	5	4	0.00131081	5781, 2932, 3553, 4792, 999	123	53	13528	10.3758	0.935772	0.0126877	2.24163
GOTERM_BP_FAT	GO:0002252~immune effector process	7	5.6	0.00133475	4615, 1378, 5970, 721, 925, 1380, 5788	123	134	13528	5.74542	0.938915	0.0128587	2.28213
GOTERM_MF_FAT	GO:0003697~single-stranded DNA binding	5	4	0.00136216	5887, 2073, 7508, 7157, 4904	115	55	12983	10.2632	0.398562	0.0251012	1.8643
GOTERM_BP_FAT	GO:0051051~negative regulation of transport	7	5.6	0.0013867	5781, 3553, 4790, 345, 4792, 10062, 335	123	135	13528	5.70286	0.945217	0.013295	2.36996
GOTERM_BP_FAT	GO:0002706~regulation of lymphocyte mediated immunity	5	4	0.00140591	3458, 567, 3553, 5788, 3558	123	54	13528	10.1837	0.947379	0.0134167	2.40241
GOTERM_MF_FAT	GO:0030674~protein binding, bridging	6	4.8	0.00140976	1398, 6714, 4014, 1399, 1296, 2885	115	94	12983	7.20611	0.409161	0.0247464	1.92886
GOTERM_BP_FAT	GO:0000186~activation of MAPKK activity	4	3.2	0.00142381	4616, 1956, 4216, 5663	123	25	13528	17.5974	0.949316	0.0135248	2.43265
GOTERM_BP_FAT	GO:0002822~regulation of adaptive immune response based on somatic recombination of immune receptors built from immunoglobulin superfamily domains	5	4	0.00150572	3458, 567, 3553, 5788, 3558	123	55	13528	9.99852	0.957312	0.0142334	2.57089
GOTERM_BP_FAT	GO:0050671~positive regulation of lymphocyte proliferation	5	4	0.00150572	3458, 3606, 3553, 5788, 3558	123	55	13528	9.99852	0.957312	0.0142334	2.57089
GOTERM_BP_FAT	GO:0008285~negative regulation of cell proliferation	11	8.8	0.00157644	1003, 3725, 3458, 2064, 3553, 151888, 8764, 6935, 7157, 3558, 4087	123	361	13528	3.35131	0.963194	0.0148305	2.69009
GOTERM_BP_FAT	GO:0034504~protein localization in nucleus	6	4.8	0.00159087	3725, 3458, 4792, 9372, 7157, 5594	123	94	13528	7.02024	0.964291	0.0148985	2.7144
GOTERM_BP_FAT	GO:0070665~positive regulation of leukocyte proliferation	5	4	0.00161037	3458, 3606, 3553, 5788, 3558	123	56	13528	9.81998	0.965721	0.0150127	2.74723
GOTERM_BP_FAT	GO:0002819~regulation of adaptive immune response	5	4	0.00161037	3458, 567, 3553, 5788, 3558	123	56	13528	9.81998	0.965721	0.0150127	2.74723
GOTERM_BP_FAT	GO:0032946~positive regulation of mononuclear cell proliferation	5	4	0.00161037	3458, 3606, 3553, 5788, 3558	123	56	13528	9.81998	0.965721	0.0150127	2.74723
GOTERM_BP_FAT	GO:0060558~regulation of calcidiol 1-monooxygenase activity	3	2.4	0.00164462	3458, 3553, 4790	123	7	13528	47.1359	0.968096	0.0152619	2.80489
GOTERM_BP_FAT	GO:0046825~regulation of protein export from nucleus	3	2.4	0.00164462	5781, 2932, 3553	123	7	13528	47.1359	0.968096	0.0152619	2.80489
GOTERM_BP_FAT	GO:0010552~positive regulation of specific transcription from RNA polymerase II promoter	5	4	0.00171997	4851, 4792, 10062, 7157, 1499	123	57	13528	9.6477	0.972758	0.0158858	2.9316
GOTERM_BP_FAT	GO:0045732~positive regulation of protein catabolic process	4	3.2	0.0017871	3458, 5045, 3553, 4092	123	27	13528	16.2939	0.976335	0.0164288	3.04437
GOTERM_BP_FAT	GO:0046822~regulation of nucleocytoplasmic transport	5	4	0.00183465	5781, 2932, 3553, 4792, 999	123	58	13528	9.48136	0.97858	0.0167889	3.12416
GOTERM_BP_FAT	GO:0048870~cell motility	10	8	0.00184055	3458, 6714, 338, 6273, 3091, 5663, 3791, 3553, 5159, 335	123	307	13528	3.58253	0.978844	0.0167693	3.13406
GOTERM_BP_FAT	GO:0051674~localization of cell	10	8	0.00184055	3458, 6714, 338, 6273, 3091, 5663, 3791, 3553, 5159, 335	123	307	13528	3.58253	0.978844	0.0167693	3.13406
GOTERM_BP_FAT	GO:0016071~mRNA metabolic process	11	8.8	0.00189038	10421, 5394, 8175, 25804, 6635, 6634, 57819, 10262, 51690, 4904, 351	123	370	13528	3.26979	0.980943	0.0171452	3.21761
GOTERM_BP_FAT	GO:0032963~collagen metabolic process	4	3.2	0.00198847	4313, 4312, 4318, 3091	123	28	13528	15.712	0.984486	0.01795	3.38188
GOTERM_CC_FAT	GO:0030139~endocytic vesicle	5	4	0.00199565	3949, 338, 19, 1956, 335	117	59	12782	9.25829	0.4475	0.0364023	2.63016
GOTERM_BP_FAT	GO:0006873~cellular ion homeostasis	11	8.8	0.00204528	3725, 2064, 9368, 5663, 3553, 3932, 4092, 7157, 5788, 351, 3558	123	374	13528	3.23482	0.986229	0.0183795	3.47689
GOTERM_BP_FAT	GO:0006308~DNA catabolic process	5	4	0.00207971	1022, 5887, 2071, 2073, 7508	123	60	13528	9.16531	0.987188	0.0186065	3.53443
GOTERM_BP_FAT	GO:0045785~positive regulation of cell adhesion	5	4	0.00207971	2064, 6714, 7168, 3553, 4092	123	60	13528	9.16531	0.987188	0.0186065	3.53443
GOTERM_BP_FAT	GO:0051091~positive regulation of transcription factor activity	5	4	0.00207971	4615, 8737, 2033, 5970, 3553	123	60	13528	9.16531	0.987188	0.0186065	3.53443
GOTERM_BP_FAT	GO:0048302~regulation of isotype switching to IgG isotypes	3	2.4	0.0021799	3458, 5788, 3558	123	8	13528	41.2439	0.989616	0.0194122	3.7017
GOTERM_BP_FAT	GO:0002697~regulation of immune effector process	6	4.8	0.00218392	3458, 567, 3553, 5788, 335, 3558	123	101	13528	6.53369	0.989703	0.0193654	3.7084
GOTERM_BP_FAT	GO:0030856~regulation of epithelial cell differentiation	4	3.2	0.00220342	595, 4851, 6935, 1499	123	29	13528	15.1702	0.990116	0.0194544	3.74092
GOTERM_CC_FAT	GO:0030669~clathrin-coated endocytic vesicle membrane	3	2.4	0.00220615	3949, 338, 1956	117	8	12782	40.9679	0.481051	0.0378504	2.90382
GOTERM_BP_FAT	GO:0002703~regulation of leukocyte mediated immunity	5	4	0.00221033	3458, 567, 3553, 5788, 3558	123	61	13528	9.01506	0.990258	0.019433	3.75245
GOTERM_MF_FAT	GO:0008013~beta-catenin binding	4	3.2	0.00225228	2932, 5663, 4092, 999	115	30	12983	15.0528	0.568742	0.0375079	3.06508
GOTERM_MF_FAT	GO:0050839~cell adhesion molecule binding	4	3.2	0.00225228	7430, 5663, 999, 1499	115	30	12983	15.0528	0.568742	0.0375079	3.06508
GOTERM_BP_FAT	GO:0055082~cellular chemical homeostasis	11	8.8	0.00229674	3725, 2064, 9368, 5663, 3553, 3932, 4092, 7157, 5788, 351, 3558	123	380	13528	3.18374	0.991873	0.0201015	3.89641
GOTERM_BP_FAT	GO:0006275~regulation of DNA replication	5	4	0.00234651	3725, 3265, 6464, 5111, 7157	123	62	13528	8.86966	0.992679	0.0204478	3.97924
GOTERM_BP_FAT	GO:0046907~intracellular transport	15	12	0.00236683	3725, 19, 2932, 5663, 7157, 9372, 351, 3458, 7168, 4624, 8878, 5111, 11337, 4792, 5594	123	657	13528	2.51104	0.992985	0.0205379	4.01305
GOTERM_CC_FAT	GO:0044421~extracellular region part	19	15.2	0.00247152	2006, 4313, 338, 4312, 1296, 4318, 760, 1956, 3606, 5045, 345, 335, 3949, 3458, 1634, 721, 7076, 3553, 3558	117	960	12782	2.1622	0.520471	0.0400083	3.24781
GOTERM_BP_FAT	GO:0010605~negative regulation of macromolecule metabolic process	16	12.8	0.00247491	3725, 6774, 5970, 5663, 5710, 5045, 7316, 7157, 1499, 7076, 4790, 5788, 4092, 6935, 4087, 3558	123	734	13528	2.39747	0.994408	0.0213782	4.19263
GOTERM_BP_FAT	GO:0045619~regulation of lymphocyte differentiation	5	4	0.00248835	2064, 914, 6935, 5788, 3558	123	63	13528	8.72887	0.994563	0.021405	4.21494
GOTERM_BP_FAT	GO:0006397~mRNA processing	10	8	0.00248884	10421, 8175, 25804, 6635, 6634, 57819, 10262, 51690, 4904, 351	123	321	13528	3.42628	0.994569	0.0213216	4.21574
GOTERM_BP_FAT	GO:0060284~regulation of cell development	8	6.4	0.0025539	5970, 4851, 5663, 7316, 4092, 7157, 4087, 1942	123	205	13528	4.29205	0.995262	0.0217845	4.32366
GOTERM_BP_FAT	GO:0044259~multicellular organismal macromolecule metabolic process	4	3.2	0.00267527	4313, 4312, 4318, 3091	123	31	13528	14.1915	0.996327	0.0227169	4.52469
GOTERM_BP_FAT	GO:0006954~inflammatory response	10	8	0.00270405	4615, 6774, 1378, 5970, 3091, 721, 3553, 4790, 1380, 7132	123	325	13528	3.38412	0.996543	0.0228661	4.5723
GOTERM_BP_FAT	GO:0045830~positive regulation of isotype switching	3	2.4	0.00278622	3458, 5788, 3558	123	9	13528	36.6612	0.99709	0.0234591	4.70812
GOTERM_BP_FAT	GO:0050853~B cell receptor signaling pathway	3	2.4	0.00278622	930, 5788, 5594	123	9	13528	36.6612	0.99709	0.0234591	4.70812
GOTERM_BP_FAT	GO:0051044~positive regulation of membrane protein ectodomain proteolysis	3	2.4	0.00278622	3458, 5045, 3553	123	9	13528	36.6612	0.99709	0.0234591	4.70812
GOTERM_BP_FAT	GO:0045911~positive regulation of DNA recombination	3	2.4	0.00278622	3458, 5788, 3558	123	9	13528	36.6612	0.99709	0.0234591	4.70812
GOTERM_MF_FAT	GO:0060090~molecular adaptor activity	5	4	0.00282436	1398, 6714, 1399, 2885, 6464	115	67	12983	8.42505	0.6518	0.0448325	3.82961
GOTERM_CC_FAT	GO:0005912~adherens junction	7	5.6	0.0028639	4624, 7414, 5829, 4092, 5788, 999, 1499	117	155	12782	4.93377	0.573353	0.0438414	3.75436
GOTERM_BP_FAT	GO:0006913~nucleocytoplasmic transport	7	5.6	0.00287809	3725, 3458, 2932, 4792, 9372, 7157, 5594	123	156	13528	4.93517	0.997601	0.0241274	4.85974
GOTERM_BP_FAT	GO:0070664~negative regulation of leukocyte proliferation	4	3.2	0.00293276	2064, 151888, 8764, 3558	123	32	13528	13.748	0.997861	0.0244827	4.94985
GOTERM_BP_FAT	GO:0009267~cellular response to starvation	4	3.2	0.00293276	3725, 84557, 5663, 7157	123	32	13528	13.748	0.997861	0.0244827	4.94985
GOTERM_BP_FAT	GO:0032945~negative regulation of mononuclear cell proliferation	4	3.2	0.00293276	2064, 151888, 8764, 3558	123	32	13528	13.748	0.997861	0.0244827	4.94985
GOTERM_BP_FAT	GO:0050672~negative regulation of lymphocyte proliferation	4	3.2	0.00293276	2064, 151888, 8764, 3558	123	32	13528	13.748	0.997861	0.0244827	4.94985
GOTERM_BP_FAT	GO:0010876~lipid localization	7	5.6	0.00297081	3949, 338, 2583, 19, 3553, 345, 335	123	157	13528	4.90373	0.998025	0.0246986	5.01254
GOTERM_BP_FAT	GO:0009611~response to wounding	13	10.4	0.00298772	2064, 6774, 4851, 5970, 3091, 1380, 7132, 4615, 7168, 1378, 721, 3553, 4790	123	530	13528	2.69771	0.998094	0.0247394	5.04037
GOTERM_BP_FAT	GO:0007517~muscle organ development	8	6.4	0.00299931	2064, 2006, 7168, 4624, 2033, 4092, 351, 5159	123	211	13528	4.17	0.99814	0.0247367	5.05945
GOTERM_BP_FAT	GO:0051169~nuclear transport	7	5.6	0.00306575	3725, 3458, 2932, 4792, 9372, 7157, 5594	123	158	13528	4.8727	0.998382	0.0251795	5.16875
GOTERM_BP_FAT	GO:0051222~positive regulation of protein transport	5	4	0.00311477	3458, 2932, 3553, 999, 3558	123	67	13528	8.20774	0.99854	0.0254776	5.24931
GOTERM_BP_FAT	GO:0019725~cellular homeostasis	12	9.6	0.00324801	3725, 2064, 9368, 3091, 5663, 3553, 3932, 4092, 7157, 5788, 351, 3558	123	466	13528	2.8322	0.998896	0.0264515	5.46797
GOTERM_BP_FAT	GO:0006605~protein targeting	8	6.4	0.0033278	3725, 3458, 2932, 11337, 4792, 9372, 7157, 5594	123	215	13528	4.09242	0.999067	0.0269887	5.59868
GOTERM_BP_FAT	GO:0033700~phospholipid efflux	3	2.4	0.00346228	19, 345, 335	123	10	13528	32.9951	0.999296	0.0279577	5.8186
GOTERM_BP_FAT	GO:0034976~response to endoplasmic reticulum stress	4	3.2	0.00349223	595, 3458, 2932, 7157	123	34	13528	12.9393	0.999339	0.0280883	5.8675
GOTERM_BP_FAT	GO:0016477~cell migration	9	7.2	0.003521	3458, 6714, 6273, 3091, 5663, 3791, 3553, 5159, 335	123	276	13528	3.58643	0.999378	0.0282086	5.91447
GOTERM_BP_FAT	GO:0043388~positive regulation of DNA binding	5	4	0.00364975	4615, 8737, 2033, 5970, 3553	123	70	13528	7.85598	0.999525	0.0291156	6.12437
GOTERM_BP_FAT	GO:0045637~regulation of myeloid cell differentiation	5	4	0.00364975	3725, 760, 3091, 4792, 1499	123	70	13528	7.85598	0.999525	0.0291156	6.12437
GOTERM_BP_FAT	GO:0019221~cytokine-mediated signaling pathway	5	4	0.00364975	6774, 8737, 5970, 3553, 7132	123	70	13528	7.85598	0.999525	0.0291156	6.12437
GOTERM_BP_FAT	GO:0002449~lymphocyte mediated immunity	5	4	0.00364975	4615, 1378, 721, 925, 1380	123	70	13528	7.85598	0.999525	0.0291156	6.12437
GOTERM_BP_FAT	GO:0051241~negative regulation of multicellular organismal process	7	5.6	0.00368385	3458, 4851, 5045, 4790, 345, 335, 3558	123	164	13528	4.69443	0.999558	0.0292727	6.17988
GOTERM_BP_FAT	GO:0032147~activation of protein kinase activity	6	4.8	0.00369003	4616, 8517, 1956, 4216, 5663, 3558	123	114	13528	5.78862	0.999564	0.0292105	6.18994
GOTERM_BP_FAT	GO:0040008~regulation of growth	10	8	0.00371696	5290, 3458, 6774, 5781, 2033, 6464, 7316, 7157, 351, 3558	123	341	13528	3.22533	0.999588	0.0293103	6.23376
GOTERM_BP_FAT	GO:0006984~ER-nuclear signaling pathway	4	3.2	0.00379473	595, 3458, 2932, 7157	123	35	13528	12.5696	0.99965	0.0298034	6.36018
GOTERM_MF_FAT	GO:0031625~ubiquitin protein ligase binding	4	3.2	0.00381256	2064, 4792, 4092, 4087	115	36	12983	12.544	0.759444	0.0576389	5.13708
GOTERM_BP_FAT	GO:0032386~regulation of intracellular transport	5	4	0.0038411	5781, 2932, 3553, 4792, 999	123	71	13528	7.74533	0.999682	0.0300502	6.43549
GOTERM_BP_FAT	GO:0006396~RNA processing	13	10.4	0.00385244	10421, 6635, 6634, 57819, 118460, 51690, 351, 5394, 8175, 25804, 10262, 4904, 4087	123	547	13528	2.61387	0.99969	0.0300258	6.45391
GOTERM_CC_FAT	GO:0005913~cell-cell adherens junction	4	3.2	0.00385801	7414, 4092, 999, 1499	117	35	12782	12.4855	0.682743	0.0557858	5.02678
GOTERM_CC_FAT	GO:0032994~protein-lipid complex	4	3.2	0.00385801	3949, 338, 345, 335	117	35	12782	12.4855	0.682743	0.0557858	5.02678
GOTERM_CC_FAT	GO:0034358~plasma lipoprotein particle	4	3.2	0.00385801	3949, 338, 345, 335	117	35	12782	12.4855	0.682743	0.0557858	5.02678
GOTERM_MF_FAT	GO:0005123~death receptor binding	3	2.4	0.00399156	4615, 8772, 8737	115	11	12983	30.7897	0.775039	0.0579276	5.37214
GOTERM_MF_FAT	GO:0043560~insulin receptor substrate binding	3	2.4	0.00399156	5290, 5781, 2885	115	11	12983	30.7897	0.775039	0.0579276	5.37214
GOTERM_BP_FAT	GO:0034613~cellular protein localization	11	8.8	0.00402194	3725, 3458, 1956, 2932, 5111, 11337, 4792, 9372, 7157, 1499, 5594	123	411	13528	2.9436	0.999783	0.0312127	6.72865
GOTERM_BP_FAT	GO:0019218~regulation of steroid metabolic process	4	3.2	0.00411273	3458, 338, 4790, 335	123	36	13528	12.2204	0.999821	0.0317897	6.8755
GOTERM_MF_FAT	GO:0001948~glycoprotein binding	4	3.2	0.00412268	920, 2064, 3932, 5788	115	37	12983	12.2049	0.78582	0.0575448	5.544
GOTERM_BP_FAT	GO:0008380~RNA splicing	9	7.2	0.00418234	10421, 8175, 25804, 6635, 6634, 57819, 10262, 51690, 4904	123	284	13528	3.4854	0.999845	0.0322015	6.98795
GOTERM_BP_FAT	GO:0007155~cell adhesion	15	12	0.0041846	1003, 920, 6714, 1296, 1956, 914, 7414, 5663, 351, 1499, 7430, 5829, 5788, 3558, 999	123	700	13528	2.35679	0.999846	0.0321007	6.99158
GOTERM_BP_FAT	GO:0031293~membrane protein intracellular domain proteolysis	3	2.4	0.00420679	5970, 5663, 4790	123	11	13528	29.9956	0.999853	0.032151	7.0274
GOTERM_BP_FAT	GO:0010885~regulation of cholesterol storage	3	2.4	0.00420679	338, 19, 10062	123	11	13528	29.9956	0.999853	0.032151	7.0274
GOTERM_BP_FAT	GO:0070727~cellular macromolecule localization	11	8.8	0.00423238	3725, 3458, 1956, 2932, 5111, 11337, 4792, 9372, 7157, 1499, 5594	123	414	13528	2.92227	0.99986	0.0322264	7.06869
GOTERM_BP_FAT	GO:0022610~biological adhesion	15	12	0.00423759	1003, 920, 6714, 1296, 1956, 914, 7414, 5663, 351, 1499, 7430, 5829, 5788, 3558, 999	123	701	13528	2.35343	0.999862	0.0321488	7.0771
GOTERM_CC_FAT	GO:0005675~holo TFIIH complex	3	2.4	0.00425703	1022, 2071, 2073	117	11	12782	29.7949	0.718335	0.0585509	5.53311
GOTERM_CC_FAT	GO:0045334~clathrin-coated endocytic vesicle	3	2.4	0.00425703	3949, 338, 1956	117	11	12782	29.7949	0.718335	0.0585509	5.53311
GOTERM_BP_FAT	GO:0055080~cation homeostasis	9	7.2	0.00436177	6548, 5663, 3791, 3553, 3932, 7157, 5788, 351, 3558	123	286	13528	3.46103	0.999894	0.032958	7.27719
GOTERM_CC_FAT	GO:0009986~cell surface	10	8	0.00438938	920, 930, 914, 5663, 5045, 925, 151888, 8764, 5788, 351	117	348	12782	3.13931	0.729238	0.057658	5.70051
GOTERM_BP_FAT	GO:0044236~multicellular organismal metabolic process	4	3.2	0.00444647	4313, 4312, 4318, 3091	123	37	13528	11.8901	0.999911	0.0334681	7.41344
GOTERM_BP_FAT	GO:0060429~epithelium development	8	6.4	0.0044798	3725, 6703, 7430, 4014, 841, 760, 3791, 1499	123	227	13528	3.87608	0.999917	0.0335947	7.46699
GOTERM_CC_FAT	GO:0009897~external side of plasma membrane	7	5.6	0.00450839	920, 930, 914, 925, 151888, 8764, 5788	117	170	12782	4.49844	0.738682	0.056679	5.85079
GOTERM_BP_FAT	GO:0000302~response to reactive oxygen species	5	4	0.00467444	3725, 7168, 2033, 5970, 5829	123	75	13528	7.33225	0.999945	0.0349071	7.7792
GOTERM_BP_FAT	GO:0042692~muscle cell differentiation	6	4.8	0.0047545	3265, 2064, 7168, 4624, 351, 1499	123	121	13528	5.45374	0.999953	0.0353698	7.90734
GOTERM_MF_FAT	GO:0017127~cholesterol transporter activity	3	2.4	0.00476248	338, 19, 335	115	12	12983	28.2239	0.831471	0.0638223	6.37836
GOTERM_MF_FAT	GO:0045309~protein phosphorylated amino acid binding	3	2.4	0.00476248	1398, 2885, 5594	115	12	12983	28.2239	0.831471	0.0638223	6.37836
GOTERM_CC_FAT	GO:0070161~anchoring junction	7	5.6	0.0047713	4624, 7414, 5829, 4092, 5788, 999, 1499	117	172	12782	4.44613	0.758399	0.0574687	6.18201
GOTERM_BP_FAT	GO:0045767~regulation of anti-apoptosis	4	3.2	0.00479617	6548, 8737, 4092, 5296	123	38	13528	11.5772	0.999957	0.0355489	7.97396
GOTERM_BP_FAT	GO:0000902~cell morphogenesis	10	8	0.00491745	7430, 2064, 5781, 1956, 2043, 4851, 3091, 7316, 351, 1499	123	356	13528	3.08943	0.999967	0.0363053	8.16761
GOTERM_BP_FAT	GO:0010745~negative regulation of foam cell differentiation	3	2.4	0.00501847	19, 4792, 10062	123	12	13528	27.4959	0.999973	0.0369092	8.32862
GOTERM_BP_FAT	GO:0010888~negative regulation of lipid storage	3	2.4	0.00501847	19, 4792, 10062	123	12	13528	27.4959	0.999973	0.0369092	8.32862
GOTERM_BP_FAT	GO:0051099~positive regulation of binding	5	4	0.00537378	4615, 8737, 2033, 5970, 3553	123	78	13528	7.05024	0.999987	0.0393393	8.8928
GOTERM_CC_FAT	GO:0044463~cell projection part	8	6.4	0.00543317	7430, 7168, 2932, 5663, 2099, 351, 1499, 5594	117	234	12782	3.73497	0.801715	0.062672	7.01109
GOTERM_BP_FAT	GO:0051345~positive regulation of hydrolase activity	7	5.6	0.00563089	3458, 7168, 1956, 3932, 10062, 7157, 335	123	179	13528	4.30104	0.999993	0.0410444	9.29901
GOTERM_BP_FAT	GO:0046640~regulation of alpha-beta T cell proliferation	3	2.4	0.00589609	151888, 8764, 5788	123	13	13528	25.3809	0.999996	0.0427925	9.71621
GOTERM_BP_FAT	GO:0032770~positive regulation of monooxygenase activity	3	2.4	0.00589609	3458, 3091, 3553	123	13	13528	25.3809	0.999996	0.0427925	9.71621
GOTERM_BP_FAT	GO:0045191~regulation of isotype switching	3	2.4	0.00589609	3458, 5788, 3558	123	13	13528	25.3809	0.999996	0.0427925	9.71621
GOTERM_BP_FAT	GO:0051092~positive regulation of NF-kappaB transcription factor activity	4	3.2	0.0059431	4615, 8737, 5970, 3553	123	41	13528	10.7301	0.999996	0.0429787	9.78998
GOTERM_BP_FAT	GO:0002700~regulation of production of molecular mediator of immune response	4	3.2	0.0059431	3458, 5788, 335, 3558	123	41	13528	10.7301	0.999996	0.0429787	9.78998
GOTERM_BP_FAT	GO:0030030~cell projection organization	10	8	0.00607951	2064, 7168, 5781, 1956, 2043, 4851, 7414, 7316, 351, 999	123	368	13528	2.98869	0.999997	0.0437954	10.0037
GOTERM_BP_FAT	GO:0030182~neuron differentiation	11	8.8	0.0062474	2064, 6774, 5781, 1956, 2043, 4851, 5663, 7316, 351, 999, 1942	123	438	13528	2.76215	0.999998	0.0448272	10.2661
GOTERM_BP_FAT	GO:0040007~growth	7	5.6	0.00625768	5781, 6548, 4851, 5663, 2073, 351, 4087	123	183	13528	4.20703	0.999998	0.0447466	10.2821
GOTERM_BP_FAT	GO:0006508~proteolysis	19	15.2	0.00629784	84557, 4313, 841, 4312, 4318, 5970, 5663, 8945, 10533, 5710, 5045, 7316, 867, 1380, 1378, 5887, 8878, 721, 4790	123	1054	13528	1.98263	0.999998	0.0448753	10.3448
GOTERM_BP_FAT	GO:0042594~response to starvation	4	3.2	0.00635866	3725, 84557, 5663, 7157	123	42	13528	10.4746	0.999998	0.045147	10.4396
GOTERM_MF_FAT	GO:0015248~sterol transporter activity	3	2.4	0.00649166	338, 19, 335	115	14	12983	24.1919	0.9119	0.083103	8.59929
GOTERM_BP_FAT	GO:0000904~cell morphogenesis involved in differentiation	8	6.4	0.0065991	2064, 5781, 2043, 4851, 3091, 7316, 351, 1499	123	244	13528	3.60602	0.999999	0.0466614	10.8134
GOTERM_BP_FAT	GO:0017038~protein import	6	4.8	0.00663057	3725, 3458, 4792, 9372, 7157, 5594	123	131	13528	5.03742	0.999999	0.0467221	10.8623
GOTERM_BP_FAT	GO:0022604~regulation of cell morphogenesis	6	4.8	0.00663057	7430, 5663, 3791, 4092, 4087, 1942	123	131	13528	5.03742	0.999999	0.0467221	10.8623
GOTERM_BP_FAT	GO:0002683~negative regulation of immune system process	5	4	0.00668911	2064, 151888, 8764, 5788, 3558	123	83	13528	6.62553	0.999999	0.0469685	10.953
GOTERM_BP_FAT	GO:0006641~triglyceride metabolic process	4	3.2	0.00679116	338, 5781, 345, 10062	123	43	13528	10.231	0.999999	0.0475113	11.111
GOTERM_CC_FAT	GO:0043198~dendritic shaft	3	2.4	0.00691939	2932, 5663, 1499	117	14	12782	23.4103	0.872826	0.0762515	8.84813
GOTERM_MF_FAT	GO:0043565~sequence-specific DNA binding	13	10.4	0.00696644	3725, 6774, 4851, 5970, 3091, 2099, 7157, 1499, 4790, 10062, 4092, 6935, 4087	115	607	12983	2.41786	0.926287	0.0859924	9.20049
GOTERM_BP_FAT	GO:0055074~calcium ion homeostasis	7	5.6	0.00711089	5663, 3791, 3553, 3932, 5788, 351, 3558	123	188	13528	4.09514	1	0.0495347	11.6043
GOTERM_BP_FAT	GO:0060341~regulation of cellular localization	8	6.4	0.00719116	3458, 5781, 2932, 3553, 4792, 999, 335, 3558	123	248	13528	3.54786	1	0.0499161	11.7277
GOTERM_BP_FAT	GO:0031669~cellular response to nutrient levels	4	3.2	0.00724075	3725, 84557, 5663, 7157	123	44	13528	9.99852	1	0.0500873	11.8039
GOTERM_BP_FAT	GO:0048871~multicellular organismal homeostasis	5	4	0.00726993	6774, 3791, 3553, 5159, 1499	123	85	13528	6.46963	1	0.0501197	11.8487
GOTERM_MF_FAT	GO:0070325~lipoprotein receptor binding	3	2.4	0.00744764	338, 345, 335	115	15	12983	22.5791	0.938478	0.0887568	9.80606
GOTERM_BP_FAT	GO:0048732~gland development	6	4.8	0.00750878	2064, 1399, 1956, 3667, 999, 335	123	135	13528	4.88817	1	0.0515601	12.2146
GOTERM_BP_FAT	GO:0002443~leukocyte mediated immunity	5	4	0.00757243	4615, 1378, 721, 925, 1380	123	86	13528	6.3944	1	0.0518179	12.3118
GOTERM_BP_FAT	GO:0051605~protein maturation by peptide bond cleavage	5	4	0.00757243	1378, 5663, 721, 5045, 1380	123	86	13528	6.3944	1	0.0518179	12.3118
GOTERM_MF_FAT	GO:0046332~SMAD binding	4	3.2	0.00760761	3725, 4092, 1499, 4087	115	46	12983	9.81701	0.942068	0.0877914	10.0065
GOTERM_CC_FAT	GO:0031982~vesicle	14	11.2	0.00765845	84557, 338, 682, 19, 1956, 4851, 5663, 5045, 351, 335, 3949, 2885, 7076, 3553	117	670	12782	2.28279	0.898054	0.0810901	9.74909
GOTERM_BP_FAT	GO:0032369~negative regulation of lipid transport	3	2.4	0.00784418	4790, 345, 10062	123	15	13528	21.9967	1	0.0534599	12.7259
GOTERM_BP_FAT	GO:0046627~negative regulation of insulin receptor signaling pathway	3	2.4	0.00784418	5970, 3667, 3553	123	15	13528	21.9967	1	0.0534599	12.7259
GOTERM_BP_FAT	GO:0032642~regulation of chemokine production	3	2.4	0.00784418	3458, 3091, 3553	123	15	13528	21.9967	1	0.0534599	12.7259
GOTERM_BP_FAT	GO:0007176~regulation of epidermal growth factor receptor activity	3	2.4	0.00784418	6464, 5663, 351	123	15	13528	21.9967	1	0.0534599	12.7259
GOTERM_BP_FAT	GO:0002711~positive regulation of T cell mediated immunity	3	2.4	0.00784418	567, 3553, 5788	123	15	13528	21.9967	1	0.0534599	12.7259
GOTERM_BP_FAT	GO:0051960~regulation of nervous system development	7	5.6	0.00785186	3458, 5970, 4851, 5663, 7316, 7157, 1942	123	192	13528	4.00982	1	0.0533381	12.7376
GOTERM_BP_FAT	GO:0006469~negative regulation of protein kinase activity	5	4	0.00788311	4616, 1647, 5663, 3553, 5788	123	87	13528	6.3209	1	0.053373	12.7851
GOTERM_BP_FAT	GO:0007267~cell-cell signaling	13	10.4	0.00791425	1948, 3606, 5663, 7316, 351, 1942, 1499, 2885, 3553, 11337, 4087, 3558, 5594	123	600	13528	2.38298	1	0.0534068	12.8324
GOTERM_BP_FAT	GO:0030155~regulation of cell adhesion	6	4.8	0.00797696	2064, 6714, 7168, 3606, 3553, 4092	123	137	13528	4.81681	1	0.0536479	12.9276
GOTERM_BP_FAT	GO:0018108~peptidyl-tyrosine phosphorylation	4	3.2	0.00819183	3458, 2064, 6714, 5159	123	46	13528	9.5638	1	0.0548827	13.253
GOTERM_BP_FAT	GO:0051146~striated muscle cell differentiation	5	4	0.00820207	3265, 2064, 7168, 4624, 351	123	88	13528	6.24908	1	0.0547751	13.2685
GOTERM_CC_FAT	GO:0031252~cell leading edge	6	4.8	0.00841029	5290, 7430, 7168, 9368, 5829, 1499	117	138	12782	4.74991	0.918603	0.0856907	10.6572
GOTERM_BP_FAT	GO:0045165~cell fate commitment	6	4.8	0.00846509	4851, 5663, 3791, 7157, 1499, 4087	123	139	13528	4.7475	1	0.0563096	13.6652
GOTERM_BP_FAT	GO:0031175~neuron projection development	8	6.4	0.00849257	2064, 5781, 1956, 2043, 4851, 7316, 351, 999	123	256	13528	3.43699	1	0.0563098	13.7065
GOTERM_BP_FAT	GO:0050731~positive regulation of peptidyl-tyrosine phosphorylation	4	3.2	0.00869361	920, 3458, 8764, 3558	123	47	13528	9.36032	1	0.0574283	14.0085
GOTERM_BP_FAT	GO:0009952~anterior/posterior pattern formation	6	4.8	0.00871676	1399, 2033, 4851, 5663, 1499, 4087	123	140	13528	4.71359	1	0.0573971	14.0432
GOTERM_BP_FAT	GO:0031667~response to nutrient levels	7	5.6	0.00885454	3725, 595, 84557, 5970, 5663, 3553, 7157	123	197	13528	3.90805	1	0.0580994	14.2494
GOTERM_BP_FAT	GO:0001819~positive regulation of cytokine production	5	4	0.00886514	4615, 3458, 3606, 3091, 3553	123	90	13528	6.11021	1	0.0579863	14.2653
GOTERM_BP_FAT	GO:0033673~negative regulation of kinase activity	5	4	0.00886514	4616, 1647, 5663, 3553, 5788	123	90	13528	6.11021	1	0.0579863	14.2653
GOTERM_BP_FAT	GO:0043691~reverse cholesterol transport	3	2.4	0.00891223	19, 345, 335	123	16	13528	20.622	1	0.0581058	14.3357
GOTERM_MF_FAT	GO:0005070~SH3/SH2 adaptor activity	4	3.2	0.00905982	1398, 6714, 1399, 2885	115	49	12983	9.21597	0.96645	0.100652	11.8078
GOTERM_CC_FAT	GO:0005615~extracellular space	14	11.2	0.00913698	4313, 338, 760, 4318, 1956, 3606, 5045, 345, 335, 3949, 3458, 721, 3553, 3558	117	685	12782	2.2328	0.93453	0.0897222	11.5268
GOTERM_BP_FAT	GO:0000075~cell cycle checkpoint	5	4	0.00920942	595, 5781, 2071, 7508, 7157	123	91	13528	6.04306	1	0.0598076	14.7786
GOTERM_BP_FAT	GO:0018212~peptidyl-tyrosine modification	4	3.2	0.00921307	3458, 2064, 6714, 5159	123	48	13528	9.16531	1	0.0596466	14.784
GOTERM_BP_FAT	GO:0043410~positive regulation of MAPKKK cascade	4	3.2	0.00921307	2064, 3553, 5788, 1499	123	48	13528	9.16531	1	0.0596466	14.784
GOTERM_BP_FAT	GO:0042108~positive regulation of cytokine biosynthetic process	4	3.2	0.00921307	920, 3458, 5970, 3553	123	48	13528	9.16531	1	0.0596466	14.784
GOTERM_BP_FAT	GO:0000077~DNA damage checkpoint	4	3.2	0.00921307	595, 5781, 7508, 7157	123	48	13528	9.16531	1	0.0596466	14.784
GOTERM_BP_FAT	GO:0007398~ectoderm development	7	5.6	0.00928023	6703, 4014, 5970, 4851, 5663, 2071, 1499	123	199	13528	3.86877	1	0.0598857	14.8838
GOTERM_BP_FAT	GO:0006952~defense response	13	10.4	0.0095296	6774, 930, 5970, 3091, 1380, 7132, 4615, 3458, 1378, 721, 3553, 4790, 5788	123	615	13528	2.32486	1	0.0612641	15.2533
GOTERM_MF_FAT	GO:0015485~cholesterol binding	3	2.4	0.00953681	19, 345, 335	115	17	12983	19.9228	0.971965	0.102653	12.3921
GOTERM_BP_FAT	GO:0008203~cholesterol metabolic process	5	4	0.00956231	3949, 338, 19, 345, 335	123	92	13528	5.97738	1	0.0612816	15.3017
GOTERM_BP_FAT	GO:0006639~acylglycerol metabolic process	4	3.2	0.00975033	338, 5781, 345, 10062	123	49	13528	8.97826	1	0.0622643	15.5792
GOTERM_BP_FAT	GO:0042593~glucose homeostasis	4	3.2	0.00975033	6774, 5781, 3091, 3667	123	49	13528	8.97826	1	0.0622643	15.5792
GOTERM_BP_FAT	GO:0033500~carbohydrate homeostasis	4	3.2	0.00975033	6774, 5781, 3091, 3667	123	49	13528	8.97826	1	0.0622643	15.5792
GOTERM_BP_FAT	GO:0007610~behavior	11	8.8	0.00987952	3725, 3265, 3458, 6774, 2043, 3606, 5663, 3553, 351, 5159, 5594	123	469	13528	2.57958	1	0.0628759	15.7693
GOTERM_MF_FAT	GO:0046982~protein heterodimerization activity	7	5.6	0.0100306	8517, 2064, 338, 4624, 1956, 3091, 7157	115	208	12983	3.79937	0.976724	0.104701	12.9932
GOTERM_BP_FAT	GO:0060070~Wnt receptor signaling pathway through beta-catenin	3	2.4	0.0100414	595, 2932, 1499	123	17	13528	19.4089	1	0.0636848	16.007
GOTERM_BP_FAT	GO:0042177~negative regulation of protein catabolic process	3	2.4	0.0100414	5970, 7076, 5045	123	17	13528	19.4089	1	0.0636848	16.007
GOTERM_BP_FAT	GO:0070555~response to interleukin-1	3	2.4	0.0100414	4615, 6714, 5970	123	17	13528	19.4089	1	0.0636848	16.007
GOTERM_BP_FAT	GO:0002221~pattern recognition receptor signaling pathway	3	2.4	0.0100414	4615, 5970, 4792	123	17	13528	19.4089	1	0.0636848	16.007
GOTERM_BP_FAT	GO:0006638~neutral lipid metabolic process	4	3.2	0.0103055	338, 5781, 345, 10062	123	50	13528	8.7987	1	0.0651165	16.3935
GOTERM_BP_FAT	GO:0033365~protein localization in organelle	6	4.8	0.0103364	3725, 3458, 4792, 9372, 7157, 5594	123	146	13528	4.51988	1	0.0651108	16.4386
GOTERM_CC_FAT	GO:0042995~cell projection	14	11.2	0.0104749	2064, 760, 9368, 3091, 2932, 5663, 2099, 351, 1499, 5290, 7430, 7168, 5829, 5594	117	697	12782	2.19436	0.956171	0.0989985	13.1075
GOTERM_BP_FAT	GO:0055065~metal ion homeostasis	7	5.6	0.0106451	5663, 3791, 3553, 3932, 5788, 351, 3558	123	205	13528	3.75554	1	0.0667992	16.8881
GOTERM_BP_FAT	GO:0050864~regulation of B cell activation	4	3.2	0.0108787	3458, 151888, 5788, 3558	123	51	13528	8.62618	1	0.0680189	17.2266
GOTERM_BP_FAT	GO:0006662~glycerol ether metabolic process	4	3.2	0.0108787	338, 5781, 345, 10062	123	51	13528	8.62618	1	0.0680189	17.2266
GOTERM_BP_FAT	GO:0051348~negative regulation of transferase activity	5	4	0.0110616	4616, 1647, 5663, 3553, 5788	123	96	13528	5.72832	1	0.0689235	17.4907
GOTERM_BP_FAT	GO:0010464~regulation of mesenchymal cell proliferation	3	2.4	0.0112304	3667, 3791, 6935	123	18	13528	18.3306	1	0.0697373	17.7338
GOTERM_BP_FAT	GO:0010469~regulation of receptor activity	3	2.4	0.0112304	6464, 5663, 351	123	18	13528	18.3306	1	0.0697373	17.7338
GOTERM_BP_FAT	GO:0001837~epithelial to mesenchymal transition	3	2.4	0.0112304	4851, 3091, 1499	123	18	13528	18.3306	1	0.0697373	17.7338
GOTERM_BP_FAT	GO:0019915~lipid storage	3	2.4	0.0112304	2583, 3553, 335	123	18	13528	18.3306	1	0.0697373	17.7338
GOTERM_BP_FAT	GO:0055002~striated muscle cell development	4	3.2	0.01147	2064, 7168, 4624, 351	123	52	13528	8.46029	1	0.0709702	18.0777
GOTERM_BP_FAT	GO:0031570~DNA integrity checkpoint	4	3.2	0.01147	595, 5781, 7508, 7157	123	52	13528	8.46029	1	0.0709702	18.0777
GOTERM_CC_FAT	GO:0005901~caveola	4	3.2	0.0116548	3949, 6714, 3667, 867	117	52	12782	8.40368	0.969248	0.106238	14.4798
GOTERM_BP_FAT	GO:0048666~neuron development	9	7.2	0.0116606	2064, 5781, 1956, 2043, 4851, 5663, 7316, 351, 999	123	339	13528	2.91992	1	0.0719015	18.3503
GOTERM_MF_FAT	GO:0032934~sterol binding	3	2.4	0.011855	19, 345, 335	115	19	12983	17.8256	0.988302	0.11935	15.1809
GOTERM_BP_FAT	GO:0002526~acute inflammatory response	5	4	0.0118649	6774, 1378, 721, 3553, 1380	123	98	13528	5.61142	1	0.072908	18.6415
GOTERM_CC_FAT	GO:0044451~nucleoplasm part	12	9.6	0.0119991	3725, 1022, 2033, 5970, 3091, 2071, 2073, 6935, 4092, 7157, 1499, 4087	117	555	12782	2.36212	0.972271	0.105991	14.8764
GOTERM_BP_FAT	GO:0010001~glial cell differentiation	4	3.2	0.0120796	2064, 1956, 4851, 1499	123	53	13528	8.30066	1	0.073969	18.9465
GOTERM_BP_FAT	GO:0018904~organic ether metabolic process	4	3.2	0.0120796	338, 5781, 345, 10062	123	53	13528	8.30066	1	0.073969	18.9465
GOTERM_BP_FAT	GO:0030900~forebrain development	6	4.8	0.0121516	6714, 4851, 5663, 351, 999, 1499	123	152	13528	4.34146	1	0.0741801	19.0485
GOTERM_BP_FAT	GO:0030324~lung development	5	4	0.0122803	2033, 4851, 3791, 1499, 4087	123	99	13528	5.55473	1	0.0747237	19.2306
GOTERM_BP_FAT	GO:0002758~innate immune response-activating signal transduction	3	2.4	0.0124782	4615, 5970, 4792	123	19	13528	17.3659	1	0.0756703	19.5099
GOTERM_BP_FAT	GO:0002218~activation of innate immune response	3	2.4	0.0124782	4615, 5970, 4792	123	19	13528	17.3659	1	0.0756703	19.5099
GOTERM_BP_FAT	GO:0033344~cholesterol efflux	3	2.4	0.0124782	19, 345, 335	123	19	13528	17.3659	1	0.0756703	19.5099
GOTERM_BP_FAT	GO:0048812~neuron projection morphogenesis	7	5.6	0.0126793	2064, 5781, 1956, 2043, 4851, 7316, 351	123	213	13528	3.61449	1	0.0766288	19.7928
GOTERM_BP_FAT	GO:0048585~negative regulation of response to stimulus	5	4	0.0127049	5970, 3667, 3553, 5788, 3558	123	100	13528	5.49919	1	0.0765584	19.8286
GOTERM_BP_FAT	GO:0016064~immunoglobulin mediated immune response	4	3.2	0.0127075	4615, 1378, 721, 1380	123	54	13528	8.14694	1	0.0763553	19.8323
GOTERM_BP_FAT	GO:0000079~regulation of cyclin-dependent protein kinase activity	4	3.2	0.0127075	595, 1022, 1647, 1956	123	54	13528	8.14694	1	0.0763553	19.8323
GOTERM_BP_FAT	GO:0051250~negative regulation of lymphocyte activation	4	3.2	0.0127075	2064, 151888, 8764, 3558	123	54	13528	8.14694	1	0.0763553	19.8323
GOTERM_BP_FAT	GO:0043434~response to peptide hormone stimulus	6	4.8	0.0128019	6774, 2885, 682, 6464, 5970, 3667	123	154	13528	4.28508	1	0.076685	19.9646
GOTERM_BP_FAT	GO:0016125~sterol metabolic process	5	4	0.0131387	3949, 338, 19, 345, 335	123	101	13528	5.44474	1	0.0784115	20.4354
GOTERM_MF_FAT	GO:0004674~protein serine/threonine kinase activity	10	8	0.0133769	5394, 1022, 5599, 5894, 1956, 8737, 4216, 2932, 2071, 5594	115	430	12983	2.62548	0.993417	0.130237	16.9668
GOTERM_CC_FAT	GO:0031410~cytoplasmic vesicle	13	10.4	0.0135654	84557, 338, 682, 1956, 19, 4851, 5663, 5045, 351, 335, 3949, 7076, 3553	117	642	12782	2.21218	0.98269	0.115669	16.6595
GOTERM_BP_FAT	GO:0030323~respiratory tube development	5	4	0.0135819	2033, 4851, 3791, 1499, 4087	123	102	13528	5.39136	1	0.0807357	21.0507
GOTERM_BP_FAT	GO:0031330~negative regulation of cellular catabolic process	3	2.4	0.0137837	7076, 5045, 345	123	20	13528	16.4976	1	0.0816625	21.3294
GOTERM_BP_FAT	GO:0010676~positive regulation of cellular carbohydrate metabolic process	3	2.4	0.0137837	3458, 3091, 3667	123	20	13528	16.4976	1	0.0816625	21.3294
GOTERM_BP_FAT	GO:0030574~collagen catabolic process	3	2.4	0.0137837	4313, 4312, 4318	123	20	13528	16.4976	1	0.0816625	21.3294
GOTERM_BP_FAT	GO:0045913~positive regulation of carbohydrate metabolic process	3	2.4	0.0137837	3458, 3091, 3667	123	20	13528	16.4976	1	0.0816625	21.3294
GOTERM_BP_FAT	GO:0033619~membrane protein proteolysis	3	2.4	0.0137837	5970, 5663, 4790	123	20	13528	16.4976	1	0.0816625	21.3294
GOTERM_CC_FAT	GO:0005925~focal adhesion	5	4	0.0138484	4624, 7414, 5829, 5788, 999	117	102	12782	5.35529	0.984104	0.114688	16.978
GOTERM_CC_FAT	GO:0034385~triglyceride-rich lipoprotein particle	3	2.4	0.0139443	338, 345, 335	117	20	12782	16.3872	0.984557	0.112334	17.0856
GOTERM_CC_FAT	GO:0034361~very-low-density lipoprotein particle	3	2.4	0.0139443	338, 345, 335	117	20	12782	16.3872	0.984557	0.112334	17.0856
GOTERM_BP_FAT	GO:0019724~B cell mediated immunity	4	3.2	0.0140184	4615, 1378, 721, 1380	123	56	13528	7.85598	1	0.0827711	21.6524
GOTERM_BP_FAT	GO:0055001~muscle cell development	4	3.2	0.0140184	2064, 7168, 4624, 351	123	56	13528	7.85598	1	0.0827711	21.6524
GOTERM_CC_FAT	GO:0031988~membrane-bounded vesicle	12	9.6	0.0140658	3949, 338, 2885, 682, 19, 1956, 4851, 7076, 5045, 3553, 351, 335	117	568	12782	2.30805	0.985112	0.110296	17.2218
GOTERM_BP_FAT	GO:0006281~DNA repair	8	6.4	0.0144303	1022, 1647, 5887, 2071, 2073, 5111, 7508, 7157	123	284	13528	3.09813	1	0.0848761	22.2162
GOTERM_BP_FAT	GO:0030198~extracellular matrix organization	5	4	0.0144966	2006, 1296, 4318, 1634, 351	123	104	13528	5.28768	1	0.0850149	22.3066
GOTERM_BP_FAT	GO:0009991~response to extracellular stimulus	7	5.6	0.0146715	3725, 595, 84557, 5970, 5663, 3553, 7157	123	220	13528	3.49948	1	0.085764	22.5446
GOTERM_BP_FAT	GO:0035295~tube development	7	5.6	0.0146715	841, 2033, 4851, 5663, 3791, 1499, 4087	123	220	13528	3.49948	1	0.085764	22.5446
GOTERM_BP_FAT	GO:0045787~positive regulation of cell cycle	4	3.2	0.0147017	595, 1956, 3553, 351	123	57	13528	7.71816	1	0.0856965	22.5856
GOTERM_BP_FAT	GO:0002695~negative regulation of leukocyte activation	4	3.2	0.0147017	2064, 151888, 8764, 3558	123	57	13528	7.71816	1	0.0856965	22.5856
GOTERM_CC_FAT	GO:0010008~endosome membrane	4	3.2	0.014936	3949, 338, 567, 9372	117	57	12782	7.66652	0.988546	0.113785	18.1914
GOTERM_CC_FAT	GO:0044440~endosomal part	4	3.2	0.014936	3949, 338, 567, 9372	117	57	12782	7.66652	0.988546	0.113785	18.1914
GOTERM_BP_FAT	GO:0009968~negative regulation of signal transduction	7	5.6	0.0149729	595, 5970, 3667, 3553, 4792, 4092, 5788	123	221	13528	3.48365	1	0.0869778	22.9531
GOTERM_BP_FAT	GO:0002709~regulation of T cell mediated immunity	3	2.4	0.0151456	567, 3553, 5788	123	21	13528	15.712	1	0.0877016	23.1862
GOTERM_BP_FAT	GO:0045429~positive regulation of nitric oxide biosynthetic process	3	2.4	0.0151456	3458, 1956, 3553	123	21	13528	15.712	1	0.0877016	23.1862
GOTERM_BP_FAT	GO:0042158~lipoprotein biosynthetic process	4	3.2	0.0154035	338, 19, 10533, 335	123	58	13528	7.58509	1	0.0888939	23.5332
GOTERM_BP_FAT	GO:0046486~glycerolipid metabolic process	6	4.8	0.0156384	5290, 338, 5781, 345, 10062, 335	123	162	13528	4.07347	1	0.0899507	23.8478
GOTERM_CC_FAT	GO:0005924~cell-substrate adherens junction	5	4	0.0157506	4624, 7414, 5829, 5788, 999	117	106	12782	5.1532	0.991042	0.116694	19.0894
GOTERM_BP_FAT	GO:0007254~JNK cascade	4	3.2	0.016124	1399, 5599, 8737, 4216	123	59	13528	7.45652	1	0.0923809	24.4946
GOTERM_BP_FAT	GO:0060541~respiratory system development	5	4	0.0164411	2033, 4851, 3791, 1499, 4087	123	108	13528	5.09184	1	0.0938691	24.9141
GOTERM_BP_FAT	GO:0055010~ventricular cardiac muscle morphogenesis	3	2.4	0.0165629	7168, 4624, 4092	123	22	13528	14.9978	1	0.0942818	25.0747
GOTERM_BP_FAT	GO:0048538~thymus development	3	2.4	0.0165629	1399, 5663, 1499	123	22	13528	14.9978	1	0.0942818	25.0747
GOTERM_BP_FAT	GO:0046824~positive regulation of nucleocytoplasmic transport	3	2.4	0.0165629	2932, 3553, 999	123	22	13528	14.9978	1	0.0942818	25.0747
GOTERM_BP_FAT	GO:0043408~regulation of MAPKKK cascade	5	4	0.0169515	2064, 8737, 3553, 5788, 1499	123	109	13528	5.04513	1	0.0961426	25.5847
GOTERM_BP_FAT	GO:0007010~cytoskeleton organization	10	8	0.0171177	1398, 7430, 3265, 2006, 7168, 4624, 5894, 1647, 11337, 1499	123	436	13528	2.52256	1	0.096786	25.8019
GOTERM_MF_FAT	GO:0005006~epidermal growth factor receptor activity	2	1.6	0.017485	2064, 1956	115	2	12983	112.896	0.998612	0.162913	21.6149
GOTERM_BP_FAT	GO:0040014~regulation of multicellular organism growth	4	3.2	0.0176211	5290, 6774, 5781, 351	123	61	13528	7.21205	1	0.0992448	26.456
GOTERM_BP_FAT	GO:0050808~synapse organization	4	3.2	0.0176211	2064, 351, 999, 1499	123	61	13528	7.21205	1	0.0992448	26.456
GOTERM_BP_FAT	GO:0050866~negative regulation of cell activation	4	3.2	0.0176211	2064, 151888, 8764, 3558	123	61	13528	7.21205	1	0.0992448	26.456
GOTERM_BP_FAT	GO:0051563~smooth endoplasmic reticulum calcium ion homeostasis	2	1.6	0.017956	5663, 351	123	2	13528	109.984	1	0.10078	26.8881
GOTERM_BP_FAT	GO:0007611~learning or memory	5	4	0.0180018	3725, 3265, 5663, 3553, 351	123	111	13528	4.95422	1	0.100759	26.9471
GOTERM_CC_FAT	GO:0070435~Shc-EGFR complex	2	1.6	0.0180689	1956, 6464	117	2	12782	109.248	0.995553	0.12965	21.5955
GOTERM_CC_FAT	GO:0030016~myofibril	5	4	0.0183497	4313, 7168, 4624, 7414, 1499	117	111	12782	4.92107	0.995915	0.128476	21.8942
GOTERM_BP_FAT	GO:0016485~protein processing	5	4	0.0185419	1378, 5663, 721, 5045, 1380	123	112	13528	4.90999	1	0.103373	27.6384
GOTERM_MF_FAT	GO:0005496~steroid binding	4	3.2	0.01864	19, 2099, 345, 335	115	64	12983	7.05598	0.999105	0.168641	22.8775
GOTERM_CC_FAT	GO:0030055~cell-substrate junction	5	4	0.0188996	4624, 7414, 5829, 5788, 999	117	112	12782	4.87714	0.996541	0.12909	22.4759
GOTERM_BP_FAT	GO:0031098~stress-activated protein kinase signaling pathway	4	3.2	0.0191932	1399, 5599, 8737, 4216	123	63	13528	6.98309	1	0.106556	28.464
GOTERM_BP_FAT	GO:0045765~regulation of angiogenesis	4	3.2	0.0191932	2064, 3091, 3553, 7132	123	63	13528	6.98309	1	0.106556	28.464
GOTERM_CC_FAT	GO:0044449~contractile fiber part	5	4	0.0194596	4313, 7168, 4624, 7414, 1499	117	113	12782	4.83398	0.997081	0.12974	23.0643
GOTERM_BP_FAT	GO:0001101~response to acid	3	2.4	0.0195594	6714, 6548, 5970	123	24	13528	13.748	1	0.10821	28.9243
GOTERM_BP_FAT	GO:0002712~regulation of B cell mediated immunity	3	2.4	0.0195594	3458, 5788, 3558	123	24	13528	13.748	1	0.10821	28.9243
GOTERM_BP_FAT	GO:0031343~positive regulation of cell killing	3	2.4	0.0195594	3458, 567, 5788	123	24	13528	13.748	1	0.10821	28.9243
GOTERM_BP_FAT	GO:0002889~regulation of immunoglobulin mediated immune response	3	2.4	0.0195594	3458, 5788, 3558	123	24	13528	13.748	1	0.10821	28.9243
GOTERM_BP_FAT	GO:0051603~proteolysis involved in cellular protein catabolic process	12	9.6	0.0196156	84557, 841, 5970, 5887, 8878, 5663, 5710, 8945, 10533, 867, 7316, 4790	123	600	13528	2.19967	1	0.108224	28.9946
GOTERM_BP_FAT	GO:0015031~protein transport	14	11.2	0.0198329	3725, 338, 19, 2932, 10533, 5663, 7157, 9372, 3458, 3937, 5111, 4792, 11337, 5594	123	762	13528	2.0207	1	0.109082	29.2662
GOTERM_MF_FAT	GO:0005543~phospholipid binding	6	4.8	0.0198468	84557, 338, 19, 6464, 345, 335	115	177	12983	3.82697	0.999434	0.174467	24.1766
GOTERM_BP_FAT	GO:0006886~intracellular protein transport	9	7.2	0.0199268	3725, 3458, 2932, 5111, 11337, 4792, 9372, 7157, 5594	123	374	13528	2.64667	1	0.10929	29.3832
GOTERM_BP_FAT	GO:0031668~cellular response to extracellular stimulus	4	3.2	0.0200075	3725, 84557, 5663, 7157	123	64	13528	6.87398	1	0.109428	29.4836
GOTERM_BP_FAT	GO:0045471~response to ethanol	4	3.2	0.0200075	595, 6774, 2033, 7132	123	64	13528	6.87398	1	0.109428	29.4836
GOTERM_BP_FAT	GO:0044257~cellular protein catabolic process	12	9.6	0.0202698	84557, 841, 5970, 5887, 8878, 5663, 5710, 8945, 10533, 867, 7316, 4790	123	603	13528	2.18873	1	0.110508	29.8091
GOTERM_CC_FAT	GO:0005887~integral to plasma membrane	19	15.2	0.0207873	2041, 1948, 19, 930, 2043, 914, 5663, 3791, 925, 8764, 7132, 351, 1942, 3949, 1378, 3667, 151888, 5788, 5159	117	1188	12782	1.74723	0.998048	0.135056	24.4427
GOTERM_BP_FAT	GO:0042063~gliogenesis	4	3.2	0.0208407	2064, 1956, 4851, 1499	123	65	13528	6.76823	1	0.113177	30.5127
GOTERM_BP_FAT	GO:0050810~regulation of steroid biosynthetic process	3	2.4	0.0211364	3458, 338, 4790	123	25	13528	13.198	1	0.114411	30.8746
GOTERM_BP_FAT	GO:0043331~response to dsRNA	3	2.4	0.0211364	4792, 5594, 4087	123	25	13528	13.198	1	0.114411	30.8746
GOTERM_BP_FAT	GO:0055066~di-, tri-valent inorganic cation homeostasis	7	5.6	0.0211583	5663, 3791, 3553, 3932, 5788, 351, 3558	123	239	13528	3.22128	1	0.114231	30.9012
GOTERM_CC_FAT	GO:0043235~receptor complex	5	4	0.0212009	920, 2064, 8737, 3667, 925	117	116	12782	4.70896	0.998278	0.134671	24.8674
GOTERM_BP_FAT	GO:0045184~establishment of protein localization	14	11.2	0.0212055	3725, 338, 19, 2932, 10533, 5663, 7157, 9372, 3458, 3937, 5111, 4792, 11337, 5594	123	769	13528	2.0023	1	0.114182	30.9588
GOTERM_BP_FAT	GO:0060538~skeletal muscle organ development	4	3.2	0.0216926	2064, 2006, 2033, 351	123	66	13528	6.66568	1	0.116378	31.5503
GOTERM_BP_FAT	GO:0007519~skeletal muscle tissue development	4	3.2	0.0216926	2064, 2006, 2033, 351	123	66	13528	6.66568	1	0.116378	31.5503
GOTERM_BP_FAT	GO:0016044~membrane organization	9	7.2	0.0219838	3949, 3265, 19, 1956, 914, 10533, 9372, 7157, 351	123	381	13528	2.59804	1	0.117563	31.9016
GOTERM_BP_FAT	GO:0007049~cell cycle	14	11.2	0.0226484	595, 2033, 1956, 2932, 5710, 8945, 7316, 7157, 351, 1499, 3458, 1022, 1647, 5594	123	776	13528	1.98424	1	0.120628	32.6971
GOTERM_BP_FAT	GO:0050994~regulation of lipid catabolic process	3	2.4	0.0227646	3667, 3553, 345	123	26	13528	12.6904	1	0.120911	32.8352
GOTERM_BP_FAT	GO:0044243~multicellular organismal catabolic process	3	2.4	0.0227646	4313, 4312, 4318	123	26	13528	12.6904	1	0.120911	32.8352
GOTERM_BP_FAT	GO:0000018~regulation of DNA recombination	3	2.4	0.0227646	3458, 5788, 3558	123	26	13528	12.6904	1	0.120911	32.8352
GOTERM_BP_FAT	GO:0045766~positive regulation of angiogenesis	3	2.4	0.0227646	3091, 3553, 7132	123	26	13528	12.6904	1	0.120911	32.8352
GOTERM_BP_FAT	GO:0051353~positive regulation of oxidoreductase activity	3	2.4	0.0227646	3458, 3091, 3553	123	26	13528	12.6904	1	0.120911	32.8352
GOTERM_BP_FAT	GO:0002637~regulation of immunoglobulin production	3	2.4	0.0227646	3458, 5788, 3558	123	26	13528	12.6904	1	0.120911	32.8352
GOTERM_MF_FAT	GO:0051219~phosphoprotein binding	3	2.4	0.0232514	1398, 2885, 5594	115	27	12983	12.544	0.999845	0.196983	27.733
GOTERM_MF_FAT	GO:0003700~transcription factor activity	16	12.8	0.0233151	3725, 6774, 2033, 4851, 5970, 3091, 867, 2099, 7157, 1499, 4790, 10062, 6935, 4904, 4092, 4087	115	975	12983	1.85265	0.999849	0.193154	27.7981
GOTERM_BP_FAT	GO:0048858~cell projection morphogenesis	7	5.6	0.0235558	2064, 5781, 1956, 2043, 4851, 7316, 351	123	245	13528	3.14239	1	0.124575	33.769
GOTERM_CC_FAT	GO:0043292~contractile fiber	5	4	0.0243101	4313, 7168, 4624, 7414, 1499	117	121	12782	4.51437	0.999331	0.149924	27.9901
GOTERM_BP_FAT	GO:0048592~eye morphogenesis	4	3.2	0.0243617	6774, 1296, 6935, 1499	123	69	13528	6.37587	1	0.128281	34.7075
GOTERM_BP_FAT	GO:0033077~T cell differentiation in the thymus	3	2.4	0.0244428	7157, 5788, 1499	123	27	13528	12.2204	1	0.128366	34.8012
GOTERM_BP_FAT	GO:0042130~negative regulation of T cell proliferation	3	2.4	0.0244428	2064, 151888, 8764	123	27	13528	12.2204	1	0.128366	34.8012
GOTERM_BP_FAT	GO:0045428~regulation of nitric oxide biosynthetic process	3	2.4	0.0244428	3458, 1956, 3553	123	27	13528	12.2204	1	0.128366	34.8012
GOTERM_BP_FAT	GO:0055008~cardiac muscle tissue morphogenesis	3	2.4	0.0244428	7168, 4624, 4092	123	27	13528	12.2204	1	0.128366	34.8012
GOTERM_BP_FAT	GO:0060415~muscle tissue morphogenesis	3	2.4	0.0244428	7168, 4624, 4092	123	27	13528	12.2204	1	0.128366	34.8012
GOTERM_BP_FAT	GO:0051604~protein maturation	5	4	0.0244989	1378, 5663, 721, 5045, 1380	123	122	13528	4.50753	1	0.128327	34.866
GOTERM_CC_FAT	GO:0005768~endosome	8	6.4	0.0245983	1398, 3949, 920, 338, 1956, 8878, 567, 9372	117	315	12782	2.77455	0.999387	0.148542	28.2734
GOTERM_BP_FAT	GO:0030163~protein catabolic process	12	9.6	0.0247955	84557, 841, 5970, 5887, 8878, 5663, 5710, 8945, 10533, 867, 7316, 4790	123	622	13528	2.12187	1	0.129474	35.2075
GOTERM_BP_FAT	GO:0010648~negative regulation of cell communication	7	5.6	0.0248205	595, 5970, 3667, 3553, 4792, 4092, 5788	123	248	13528	3.10438	1	0.129279	35.2362
GOTERM_CC_FAT	GO:0012505~endomembrane system	14	11.2	0.0248403	920, 338, 79586, 2583, 682, 1956, 5663, 5045, 351, 3949, 2885, 567, 5111, 11337	117	782	12782	1.95584	0.999431	0.146963	28.5105
GOTERM_MF_FAT	GO:0005158~insulin receptor binding	3	2.4	0.0248984	5781, 6464, 3667	115	28	12983	12.096	0.999918	0.200622	29.3974
GOTERM_BP_FAT	GO:0006874~cellular calcium ion homeostasis	6	4.8	0.0250015	5663, 3553, 3932, 5788, 351, 3558	123	183	13528	3.60602	1	0.12985	35.4435
GOTERM_CC_FAT	GO:0031226~intrinsic to plasma membrane	19	15.2	0.0254234	2041, 1948, 19, 930, 2043, 914, 5663, 3791, 925, 8764, 7132, 351, 1942, 3949, 1378, 3667, 151888, 5788, 5159	117	1215	12782	1.7084	0.999523	0.147295	29.0787
GOTERM_BP_FAT	GO:0001501~skeletal system development	8	6.4	0.0254379	4313, 5599, 4318, 1956, 5663, 6935, 5159, 1499	123	319	13528	2.75821	1	0.131666	35.9412
GOTERM_BP_FAT	GO:0008544~epidermis development	6	4.8	0.0255204	6703, 4014, 5970, 4851, 5663, 2071	123	184	13528	3.58643	1	0.131748	36.0349
GOTERM_MF_FAT	GO:0004875~complement receptor activity	2	1.6	0.0261135	1378, 1380	115	3	12983	75.2638	0.999948	0.205093	30.6024
GOTERM_MF_FAT	GO:0070653~high-density lipoprotein receptor binding	2	1.6	0.0261135	345, 335	115	3	12983	75.2638	0.999948	0.205093	30.6024
GOTERM_BP_FAT	GO:0045740~positive regulation of DNA replication	3	2.4	0.02617	3725, 3265, 6464	123	28	13528	11.784	1	0.13458	36.7679
GOTERM_BP_FAT	GO:0045833~negative regulation of lipid metabolic process	3	2.4	0.02617	3553, 4790, 345	123	28	13528	11.784	1	0.13458	36.7679
GOTERM_BP_FAT	GO:0030888~regulation of B cell proliferation	3	2.4	0.02617	151888, 5788, 3558	123	28	13528	11.784	1	0.13458	36.7679
GOTERM_BP_FAT	GO:0031341~regulation of cell killing	3	2.4	0.02617	3458, 567, 5788	123	28	13528	11.784	1	0.13458	36.7679
GOTERM_BP_FAT	GO:0050678~regulation of epithelial cell proliferation	4	3.2	0.0262354	2064, 1956, 4851, 3791	123	71	13528	6.19627	1	0.13457	36.8412
GOTERM_MF_FAT	GO:0051059~NF-kappaB binding	3	2.4	0.0265916	5970, 2932, 4792	115	29	12983	11.6789	0.999957	0.204254	31.0713
GOTERM_BP_FAT	GO:0060559~positive regulation of calcidiol 1-monooxygenase activity	2	1.6	0.0268137	3458, 3553	123	3	13528	73.3225	1	0.137031	37.4865
GOTERM_BP_FAT	GO:0046628~positive regulation of insulin receptor signaling pathway	2	1.6	0.0268137	6714, 3667	123	3	13528	73.3225	1	0.137031	37.4865
GOTERM_BP_FAT	GO:0070141~response to UV-A	2	1.6	0.0268137	595, 1956	123	3	13528	73.3225	1	0.137031	37.4865
GOTERM_BP_FAT	GO:0046827~positive regulation of protein export from nucleus	2	1.6	0.0268137	2932, 3553	123	3	13528	73.3225	1	0.137031	37.4865
GOTERM_BP_FAT	GO:0010903~negative regulation of very-low-density lipoprotein particle remodeling	2	1.6	0.0268137	345, 335	123	3	13528	73.3225	1	0.137031	37.4865
GOTERM_CC_FAT	GO:0034747~Axin-APC-beta-catenin-GSK3B complex	2	1.6	0.0269815	2932, 1499	117	3	12782	72.8319	0.999704	0.152774	30.5767
GOTERM_CC_FAT	GO:0000139~Golgi membrane	6	4.8	0.027158	79586, 2583, 682, 5045, 567, 11337	117	186	12782	3.52412	0.999719	0.150876	30.7445
GOTERM_BP_FAT	GO:0030003~cellular cation homeostasis	7	5.6	0.0274848	5663, 3553, 3932, 7157, 5788, 351, 3558	123	254	13528	3.03105	1	0.139917	38.2274
GOTERM_MF_FAT	GO:0042803~protein homodimerization activity	8	6.4	0.0277566	920, 4624, 914, 10533, 925, 2073, 4790, 1380	115	334	12983	2.70409	0.999972	0.208104	32.2015
GOTERM_CC_FAT	GO:0016023~cytoplasmic membrane-bounded vesicle	11	8.8	0.0277837	3949, 338, 682, 19, 1956, 4851, 7076, 5045, 3553, 351, 335	117	550	12782	2.18496	0.999768	0.151334	31.3365
GOTERM_BP_FAT	GO:0035239~tube morphogenesis	5	4	0.0278645	841, 4851, 5663, 3791, 1499	123	127	13528	4.33007	1	0.141393	38.643
GOTERM_MF_FAT	GO:0016563~transcription activator activity	9	7.2	0.0278967	1022, 6774, 2033, 4851, 10062, 6935, 999, 1499, 4087	115	410	12983	2.4782	0.999974	0.205006	32.3363
GOTERM_BP_FAT	GO:0006958~complement activation, classical pathway	3	2.4	0.0279453	1378, 721, 1380	123	29	13528	11.3776	1	0.141441	38.731
GOTERM_BP_FAT	GO:0003007~heart morphogenesis	4	3.2	0.0281843	7168, 4624, 5663, 4092	123	73	13528	6.02651	1	0.142237	38.9908
GOTERM_BP_FAT	GO:0031349~positive regulation of defense response	4	3.2	0.0281843	4615, 5970, 4792, 7132	123	73	13528	6.02651	1	0.142237	38.9908
GOTERM_BP_FAT	GO:0032990~cell part morphogenesis	7	5.6	0.0284135	2064, 5781, 1956, 2043, 4851, 7316, 351	123	256	13528	3.00737	1	0.142984	39.2391
GOTERM_BP_FAT	GO:0042035~regulation of cytokine biosynthetic process	4	3.2	0.0291869	920, 3458, 5970, 3553	123	74	13528	5.94507	1	0.146284	40.0697
GOTERM_BP_FAT	GO:0002824~positive regulation of adaptive immune response based on somatic recombination of immune receptors built from immunoglobulin superfamily domains	3	2.4	0.0297677	567, 3553, 5788	123	30	13528	10.9984	1	0.148658	40.6864
GOTERM_BP_FAT	GO:0032388~positive regulation of intracellular transport	3	2.4	0.0297677	2932, 3553, 999	123	30	13528	10.9984	1	0.148658	40.6864
GOTERM_BP_FAT	GO:0045768~positive regulation of anti-apoptosis	3	2.4	0.0297677	6548, 8737, 4092	123	30	13528	10.9984	1	0.148658	40.6864
GOTERM_MF_FAT	GO:0032813~tumor necrosis factor receptor superfamily binding	3	2.4	0.0301131	4615, 8772, 8737	115	31	12983	10.9254	0.999989	0.215457	34.4353
GOTERM_BP_FAT	GO:0048469~cell maturation	4	3.2	0.0302082	3791, 7076, 351, 1499	123	75	13528	5.8658	1	0.150362	41.1502
GOTERM_BP_FAT	GO:0007409~axonogenesis	6	4.8	0.030504	2064, 5781, 2043, 4851, 7316, 351	123	193	13528	3.41918	1	0.151385	41.4596
GOTERM_BP_FAT	GO:0022402~cell cycle process	11	8.8	0.031562	595, 3458, 1647, 1956, 2932, 5710, 8945, 7316, 7157, 351, 1499	123	565	13528	2.14128	1	0.155918	42.5541
GOTERM_BP_FAT	GO:0002821~positive regulation of adaptive immune response	3	2.4	0.0316361	567, 3553, 5788	123	31	13528	10.6436	1	0.155898	42.63
GOTERM_BP_FAT	GO:0002455~humoral immune response mediated by circulating immunoglobulin	3	2.4	0.0316361	1378, 721, 1380	123	31	13528	10.6436	1	0.155898	42.63
GOTERM_CC_FAT	GO:0005681~spliceosome	5	4	0.0320801	8175, 6635, 6634, 57819, 10262	117	132	12782	4.13818	0.999938	0.169917	35.2765
GOTERM_BP_FAT	GO:0016055~Wnt receptor signaling pathway	5	4	0.0322511	595, 9368, 2932, 8945, 1499	123	133	13528	4.13473	1	0.158355	43.2565
GOTERM_BP_FAT	GO:0032870~cellular response to hormone stimulus	5	4	0.0322511	6774, 5781, 2885, 6464, 3667	123	133	13528	4.13473	1	0.158355	43.2565
GOTERM_BP_FAT	GO:0006875~cellular metal ion homeostasis	6	4.8	0.0322922	5663, 3553, 3932, 5788, 351, 3558	123	196	13528	3.36685	1	0.158179	43.2981
GOTERM_BP_FAT	GO:0010769~regulation of cell morphogenesis involved in differentiation	4	3.2	0.032307	5663, 4092, 4087, 1942	123	77	13528	5.71344	1	0.157884	43.3131
GOTERM_BP_FAT	GO:0008016~regulation of heart contraction	4	3.2	0.032307	7168, 4624, 4092, 3558	123	77	13528	5.71344	1	0.157884	43.3131
GOTERM_BP_FAT	GO:0003002~regionalization	6	4.8	0.0329025	1399, 2033, 4851, 5663, 1499, 4087	123	197	13528	3.34976	1	0.160226	43.9131
GOTERM_BP_FAT	GO:0001666~response to hypoxia	5	4	0.0330194	4313, 2033, 3606, 3091, 2071	123	134	13528	4.10387	1	0.160389	44.0301
GOTERM_BP_FAT	GO:0051438~regulation of ubiquitin-protein ligase activity	4	3.2	0.0333843	5710, 8945, 7316, 4092	123	78	13528	5.64019	1	0.16167	44.3941
GOTERM_BP_FAT	GO:0007389~pattern specification process	7	5.6	0.0338926	1399, 2033, 4851, 5663, 6935, 1499, 4087	123	267	13528	2.88347	1	0.163586	44.8974
GOTERM_MF_FAT	GO:0017070~U6 snRNA binding	2	1.6	0.0346669	57819, 51690	115	4	12983	56.4478	0.999998	0.239798	38.56
GOTERM_BP_FAT	GO:0030855~epithelial cell differentiation	5	4	0.0353883	3725, 6703, 7430, 4014, 3791	123	137	13528	4.01401	1	0.16989	46.3534
GOTERM_BP_FAT	GO:0050871~positive regulation of B cell activation	3	2.4	0.0355074	3458, 5788, 3558	123	33	13528	9.99852	1	0.170038	46.4678
GOTERM_BP_FAT	GO:0015914~phospholipid transport	3	2.4	0.0355074	19, 345, 335	123	33	13528	9.99852	1	0.170038	46.4678
GOTERM_BP_FAT	GO:0045639~positive regulation of myeloid cell differentiation	3	2.4	0.0355074	3725, 760, 3091	123	33	13528	9.99852	1	0.170038	46.4678
GOTERM_BP_FAT	GO:0070431~nucleotide-binding oligomerization domain containing 2 signaling pathway	2	1.6	0.0355922	5970, 4792	123	4	13528	54.9919	1	0.170033	46.5491
GOTERM_BP_FAT	GO:0046642~negative regulation of alpha-beta T cell proliferation	2	1.6	0.0355922	151888, 8764	123	4	13528	54.9919	1	0.170033	46.5491
GOTERM_BP_FAT	GO:0001955~blood vessel maturation	2	1.6	0.0355922	1003, 4313	123	4	13528	54.9919	1	0.170033	46.5491
GOTERM_BP_FAT	GO:0060556~regulation of vitamin D biosynthetic process	2	1.6	0.0355922	3458, 4790	123	4	13528	54.9919	1	0.170033	46.5491
GOTERM_BP_FAT	GO:0000320~re-entry into mitotic cell cycle	2	1.6	0.0355922	595, 2932	123	4	13528	54.9919	1	0.170033	46.5491
GOTERM_BP_FAT	GO:0070423~nucleotide-binding oligomerization domain containing signaling pathway	2	1.6	0.0355922	5970, 4792	123	4	13528	54.9919	1	0.170033	46.5491
GOTERM_BP_FAT	GO:0006642~triglyceride mobilization	2	1.6	0.0355922	338, 345	123	4	13528	54.9919	1	0.170033	46.5491
GOTERM_BP_FAT	GO:0034383~low-density lipoprotein particle clearance	2	1.6	0.0355922	3949, 338	123	4	13528	54.9919	1	0.170033	46.5491
GOTERM_BP_FAT	GO:0030656~regulation of vitamin metabolic process	2	1.6	0.0355922	3458, 4790	123	4	13528	54.9919	1	0.170033	46.5491
GOTERM_BP_FAT	GO:0042770~DNA damage response, signal transduction	4	3.2	0.0355946	595, 5781, 7508, 7157	123	80	13528	5.49919	1	0.169665	46.5514
GOTERM_CC_FAT	GO:0015629~actin cytoskeleton	7	5.6	0.0357905	7430, 7168, 4624, 9368, 7414, 11337, 999	117	269	12782	2.84288	0.99998	0.184732	38.5097
GOTERM_CC_FAT	GO:0034363~intermediate-density lipoprotein particle	2	1.6	0.035814	338, 345	117	4	12782	54.6239	0.99998	0.181753	38.5297
GOTERM_CC_FAT	GO:0033256~I-kappaB/NF-kappaB complex	2	1.6	0.035814	4790, 4792	117	4	12782	54.6239	0.99998	0.181753	38.5297
GOTERM_CC_FAT	GO:0030877~beta-catenin destruction complex	2	1.6	0.035814	2932, 1499	117	4	12782	54.6239	0.99998	0.181753	38.5297
GOTERM_CC_FAT	GO:0030666~endocytic vesicle membrane	3	2.4	0.0359062	3949, 338, 1956	117	33	12782	9.93162	0.999981	0.179187	38.6081
GOTERM_BP_FAT	GO:0045087~innate immune response	5	4	0.0361993	4615, 1378, 721, 1380, 7132	123	138	13528	3.98492	1	0.171949	47.1277
GOTERM_BP_FAT	GO:0051340~regulation of ligase activity	4	3.2	0.0367275	5710, 8945, 7316, 4092	123	81	13528	5.4313	1	0.173883	47.6263
GOTERM_CC_FAT	GO:0016591~DNA-directed RNA polymerase II, holoenzyme	4	3.2	0.0372836	1022, 2071, 2073, 7157	117	81	12782	5.39496	0.999987	0.18251	39.7681
GOTERM_BP_FAT	GO:0002573~myeloid leukocyte differentiation	3	2.4	0.0375084	841, 4318, 5663	123	34	13528	9.70445	1	0.176905	48.3553
GOTERM_BP_FAT	GO:0002705~positive regulation of leukocyte mediated immunity	3	2.4	0.0375084	567, 3553, 5788	123	34	13528	9.70445	1	0.176905	48.3553
GOTERM_BP_FAT	GO:0002708~positive regulation of lymphocyte mediated immunity	3	2.4	0.0375084	567, 3553, 5788	123	34	13528	9.70445	1	0.176905	48.3553
GOTERM_BP_FAT	GO:0007626~locomotory behavior	7	5.6	0.0377138	3265, 3458, 2043, 3553, 351, 5159, 5594	123	274	13528	2.8098	1	0.177409	48.5455
GOTERM_BP_FAT	GO:0052548~regulation of endopeptidase activity	4	3.2	0.0378788	5045, 3932, 7157, 999	123	82	13528	5.36506	1	0.177735	48.6978
GOTERM_BP_FAT	GO:0070482~response to oxygen levels	5	4	0.0386968	4313, 2033, 3606, 3091, 2071	123	141	13528	3.90013	1	0.180876	49.4465
GOTERM_CC_FAT	GO:0031090~organelle membrane	17	13.6	0.0387593	84557, 920, 338, 841, 79586, 5894, 2583, 682, 1956, 5663, 5045, 9372, 3949, 2885, 567, 5111, 11337	117	1096	12782	1.69454	0.999992	0.186146	40.9884
GOTERM_BP_FAT	GO:0051129~negative regulation of cellular component organization	5	4	0.0395507	5663, 345, 10062, 4092, 335	123	142	13528	3.87267	1	0.184147	50.2171
GOTERM_BP_FAT	GO:0048747~muscle fiber development	3	2.4	0.0395516	2064, 4624, 351	123	35	13528	9.42718	1	0.183751	50.2179
GOTERM_MF_FAT	GO:0005518~collagen binding	3	2.4	0.0396626	4318, 1634, 4092	115	36	12983	9.40797	1	0.265138	42.8072
GOTERM_BP_FAT	GO:0031398~positive regulation of protein ubiquitination	4	3.2	0.0402363	5710, 8945, 7316, 4092	123	84	13528	5.23732	1	0.186272	50.8277
GOTERM_CC_FAT	GO:0005626~insoluble fraction	14	11.2	0.0405433	1003, 4014, 338, 3265, 2583, 19, 6548, 5663, 7157, 351, 1499, 3667, 6566, 5594	117	839	12782	1.82297	0.999995	0.190983	42.4331
GOTERM_BP_FAT	GO:0048667~cell morphogenesis involved in neuron differentiation	6	4.8	0.0407919	2064, 5781, 2043, 4851, 7316, 351	123	209	13528	3.15743	1	0.188227	51.3174
GOTERM_BP_FAT	GO:0046777~protein amino acid autophosphorylation	4	3.2	0.0414424	2064, 1956, 8737, 5159	123	85	13528	5.17571	1	0.190571	51.8849
GOTERM_BP_FAT	GO:0031960~response to corticosteroid stimulus	4	3.2	0.0414424	595, 6714, 2033, 3553	123	85	13528	5.17571	1	0.190571	51.8849
GOTERM_BP_FAT	GO:0046634~regulation of alpha-beta T cell activation	3	2.4	0.0416362	151888, 8764, 5788	123	36	13528	9.16531	1	0.190979	52.0528
GOTERM_BP_FAT	GO:0006869~lipid transport	5	4	0.042177	3949, 338, 19, 345, 335	123	145	13528	3.79254	1	0.19284	52.5183
GOTERM_BP_FAT	GO:0010608~posttranscriptional regulation of gene expression	6	4.8	0.0422092	4092, 4904, 351, 5594, 335, 4087	123	211	13528	3.1275	1	0.192565	52.5459
GOTERM_BP_FAT	GO:0052547~regulation of peptidase activity	4	3.2	0.0426666	5045, 3932, 7157, 999	123	86	13528	5.11552	1	0.194063	52.9361
GOTERM_MF_FAT	GO:0042153~RPTP-like protein binding	2	1.6	0.0431458	1003, 999	115	5	12983	45.1583	1	0.28037	45.6057
GOTERM_MF_FAT	GO:0045294~alpha-catenin binding	2	1.6	0.0431458	7414, 1499	115	5	12983	45.1583	1	0.28037	45.6057
GOTERM_MF_FAT	GO:0030235~nitric-oxide synthase regulator activity	2	1.6	0.0431458	1956, 2099	115	5	12983	45.1583	1	0.28037	45.6057
GOTERM_BP_FAT	GO:0008286~insulin receptor signaling pathway	3	2.4	0.0437614	2885, 6464, 3667	123	37	13528	8.9176	1	0.198195	53.8577
GOTERM_BP_FAT	GO:0051969~regulation of transmission of nerve impulse	5	4	0.0439816	3265, 3458, 1956, 5663, 7316	123	147	13528	3.74094	1	0.198687	54.0411
GOTERM_BP_FAT	GO:0031953~negative regulation of protein amino acid autophosphorylation	2	1.6	0.0442921	3725, 5788	123	5	13528	43.9935	1	0.199549	54.2984
GOTERM_BP_FAT	GO:0034380~high-density lipoprotein particle assembly	2	1.6	0.0442921	19, 335	123	5	13528	43.9935	1	0.199549	54.2984
GOTERM_BP_FAT	GO:0050857~positive regulation of antigen receptor-mediated signaling pathway	2	1.6	0.0442921	3932, 5788	123	5	13528	43.9935	1	0.199549	54.2984
GOTERM_BP_FAT	GO:0010901~regulation of very-low-density lipoprotein particle remodeling	2	1.6	0.0442921	345, 335	123	5	13528	43.9935	1	0.199549	54.2984
GOTERM_MF_FAT	GO:0008289~lipid binding	9	7.2	0.0444743	84557, 338, 5894, 19, 6464, 2099, 345, 335, 3558	115	450	12983	2.25791	1	0.283035	46.6391
GOTERM_CC_FAT	GO:0030529~ribonucleoprotein complex	10	8	0.0445121	8175, 841, 25804, 6635, 6634, 57819, 10262, 7316, 51690, 4904	117	515	12782	2.12132	0.999999	0.204838	45.5304
GOTERM_BP_FAT	GO:0006355~regulation of transcription, DNA-dependent	24	19.2	0.0446351	3725, 6774, 2033, 4851, 5970, 3091, 2071, 2099, 7157, 1499, 7132, 351, 1398, 3458, 1022, 8878, 4790, 4792, 10062, 6935, 4092, 4904, 3558, 4087	123	1773	13528	1.48878	1	0.200539	54.581
GOTERM_BP_FAT	GO:0006914~autophagy	3	2.4	0.0459261	84557, 5663, 10533	123	38	13528	8.68293	1	0.205393	55.6303
GOTERM_BP_FAT	GO:0010675~regulation of cellular carbohydrate metabolic process	3	2.4	0.0459261	3458, 3091, 3667	123	38	13528	8.68293	1	0.205393	55.6303
GOTERM_BP_FAT	GO:0007266~Rho protein signal transduction	3	2.4	0.0459261	19, 345, 335	123	38	13528	8.68293	1	0.205393	55.6303
GOTERM_BP_FAT	GO:0001818~negative regulation of cytokine production	3	2.4	0.0459261	5045, 4790, 335	123	38	13528	8.68293	1	0.205393	55.6303
GOTERM_BP_FAT	GO:0051147~regulation of muscle cell differentiation	3	2.4	0.0481296	4851, 7316, 6935	123	39	13528	8.46029	1	0.213885	57.3686
GOTERM_BP_FAT	GO:0018209~peptidyl-serine modification	3	2.4	0.0481296	3458, 2932, 1634	123	39	13528	8.46029	1	0.213885	57.3686
GOTERM_BP_FAT	GO:0006109~regulation of carbohydrate metabolic process	3	2.4	0.0481296	3458, 3091, 3667	123	39	13528	8.46029	1	0.213885	57.3686
GOTERM_BP_FAT	GO:0017015~regulation of transforming growth factor beta receptor signaling pathway	3	2.4	0.0481296	5045, 6935, 4087	123	39	13528	8.46029	1	0.213885	57.3686
GOTERM_BP_FAT	GO:0042475~odontogenesis of dentine-containing tooth	3	2.4	0.0481296	760, 682, 1499	123	39	13528	8.46029	1	0.213885	57.3686
GOTERM_BP_FAT	GO:0060326~cell chemotaxis	3	2.4	0.0481296	3458, 3553, 5159	123	39	13528	8.46029	1	0.213885	57.3686
GOTERM_BP_FAT	GO:0007346~regulation of mitotic cell cycle	5	4	0.0486809	595, 1956, 3553, 7157, 351	123	152	13528	3.61789	1	0.21566	57.7933
GOTERM_BP_FAT	GO:0006351~transcription, DNA-dependent	7	5.6	0.0487728	1022, 3091, 2071, 4790, 2099, 7157, 4904	123	292	13528	2.6366	1	0.215586	57.8638
GOTERM_CC_FAT	GO:0044445~cytosolic part	5	4	0.0495555	5290, 8517, 7316, 5296, 1499	117	152	12782	3.59368	1	0.222434	49.2441
GOTERM_BP_FAT	GO:0031644~regulation of neurological system process	5	4	0.0496529	3265, 3458, 1956, 5663, 7316	123	153	13528	3.59424	1	0.218657	58.5326
GOTERM_MF_FAT	GO:0004715~non-membrane spanning protein tyrosine kinase activity	3	2.4	0.0501923	2064, 6714, 3932	115	41	12983	8.26066	1	0.308839	50.8826
GOTERM_BP_FAT	GO:0007033~vacuole organization	3	2.4	0.0503709	84557, 19, 5663	123	40	13528	8.24878	1	0.221063	59.0708
GOTERM_BP_FAT	GO:0050796~regulation of insulin secretion	3	2.4	0.0503709	3458, 5781, 3553	123	40	13528	8.24878	1	0.221063	59.0708
GOTERM_BP_FAT	GO:0032774~RNA biosynthetic process	7	5.6	0.0514761	1022, 3091, 2071, 4790, 2099, 7157, 4904	123	296	13528	2.60097	1	0.224979	59.8863
GOTERM_MF_FAT	GO:0070411~I-SMAD binding	2	1.6	0.0515509	4092, 1499	115	6	12983	37.6319	1	0.310982	51.8438
GOTERM_BP_FAT	GO:0030099~myeloid cell differentiation	4	3.2	0.0517369	841, 4318, 5663, 7076	123	93	13528	4.73048	1	0.22555	60.0765
GOTERM_CC_FAT	GO:0005794~Golgi apparatus	14	11.2	0.0523505	3265, 79586, 2583, 682, 19, 4851, 5663, 5045, 351, 2885, 567, 3932, 11337, 999	117	872	12782	1.75398	1	0.230336	51.1998
GOTERM_BP_FAT	GO:0002761~regulation of myeloid leukocyte differentiation	3	2.4	0.0526492	3725, 760, 1499	123	41	13528	8.04759	1	0.228668	60.7353
GOTERM_BP_FAT	GO:0050679~positive regulation of epithelial cell proliferation	3	2.4	0.0526492	2064, 1956, 3791	123	41	13528	8.04759	1	0.228668	60.7353
GOTERM_BP_FAT	GO:0045410~positive regulation of interleukin-6 biosynthetic process	2	1.6	0.0529142	3458, 3553	123	6	13528	36.6612	1	0.229243	60.9247
GOTERM_BP_FAT	GO:0034379~very-low-density lipoprotein particle assembly	2	1.6	0.0529142	338, 345	123	6	13528	36.6612	1	0.229243	60.9247
GOTERM_BP_FAT	GO:0010887~negative regulation of cholesterol storage	2	1.6	0.0529142	19, 10062	123	6	13528	36.6612	1	0.229243	60.9247
GOTERM_BP_FAT	GO:0042159~lipoprotein catabolic process	2	1.6	0.0529142	3949, 338	123	6	13528	36.6612	1	0.229243	60.9247
GOTERM_BP_FAT	GO:0006283~transcription-coupled nucleotide-excision repair	2	1.6	0.0529142	2071, 2073	123	6	13528	36.6612	1	0.229243	60.9247
GOTERM_BP_FAT	GO:0033683~nucleotide-excision repair, DNA incision	2	1.6	0.0529142	2071, 2073	123	6	13528	36.6612	1	0.229243	60.9247
GOTERM_BP_FAT	GO:0010875~positive regulation of cholesterol efflux	2	1.6	0.0529142	4792, 10062	123	6	13528	36.6612	1	0.229243	60.9247
GOTERM_BP_FAT	GO:0030036~actin cytoskeleton organization	6	4.8	0.0537855	1398, 7430, 3265, 2006, 7168, 4624	123	226	13528	2.91992	1	0.23217	61.5414
GOTERM_BP_FAT	GO:0030005~cellular di-, tri-valent inorganic cation homeostasis	6	4.8	0.0546169	5663, 3553, 3932, 5788, 351, 3558	123	227	13528	2.90706	1	0.23492	62.1213
GOTERM_BP_FAT	GO:0051591~response to cAMP	3	2.4	0.0549638	3725, 682, 5970	123	42	13528	7.85598	1	0.23579	62.3608
GOTERM_BP_FAT	GO:0001942~hair follicle development	3	2.4	0.0549638	5970, 4851, 5663	123	42	13528	7.85598	1	0.23579	62.3608
GOTERM_BP_FAT	GO:0006956~complement activation	3	2.4	0.0549638	1378, 721, 1380	123	42	13528	7.85598	1	0.23579	62.3608
GOTERM_BP_FAT	GO:0022405~hair cycle process	3	2.4	0.0549638	5970, 4851, 5663	123	42	13528	7.85598	1	0.23579	62.3608
GOTERM_BP_FAT	GO:0022404~molting cycle process	3	2.4	0.0549638	5970, 4851, 5663	123	42	13528	7.85598	1	0.23579	62.3608
GOTERM_BP_FAT	GO:0050868~negative regulation of T cell activation	3	2.4	0.0549638	2064, 151888, 8764	123	42	13528	7.85598	1	0.23579	62.3608
GOTERM_BP_FAT	GO:0051252~regulation of RNA metabolic process	24	19.2	0.0551081	3725, 6774, 2033, 4851, 5970, 3091, 2071, 2099, 7157, 1499, 7132, 351, 1398, 3458, 1022, 8878, 4790, 4792, 10062, 6935, 4092, 4904, 3558, 4087	123	1813	13528	1.45593	1	0.235878	62.4601
GOTERM_MF_FAT	GO:0005524~ATP binding	20	16	0.0561489	2041, 6714, 2064, 5599, 5894, 19, 1956, 4216, 2043, 2932, 3791, 2071, 7157, 5290, 1022, 4624, 8737, 3932, 5594, 5159	115	1477	12983	1.52872	1	0.329115	54.9688
GOTERM_BP_FAT	GO:0007423~sensory organ development	6	4.8	0.0563021	2064, 6774, 1296, 1956, 6935, 1499	123	229	13528	2.88167	1	0.239977	63.2716
GOTERM_CC_FAT	GO:0030424~axon	5	4	0.0566971	760, 5663, 2099, 351, 5594	117	159	12782	3.43547	1	0.243914	54.1032
GOTERM_BP_FAT	GO:0042330~taxis	5	4	0.0567555	3265, 3458, 3553, 5159, 5594	123	160	13528	3.43699	1	0.241231	63.5754
GOTERM_BP_FAT	GO:0006935~chemotaxis	5	4	0.0567555	3265, 3458, 3553, 5159, 5594	123	160	13528	3.43699	1	0.241231	63.5754
GOTERM_BP_FAT	GO:0042633~hair cycle	3	2.4	0.0573137	5970, 4851, 5663	123	43	13528	7.67328	1	0.242874	63.9462
GOTERM_BP_FAT	GO:0034599~cellular response to oxidative stress	3	2.4	0.0573137	7168, 3091, 5829	123	43	13528	7.67328	1	0.242874	63.9462
GOTERM_BP_FAT	GO:0042303~molting cycle	3	2.4	0.0573137	5970, 4851, 5663	123	43	13528	7.67328	1	0.242874	63.9462
GOTERM_BP_FAT	GO:0002541~activation of plasma proteins involved in acute inflammatory response	3	2.4	0.0573137	1378, 721, 1380	123	43	13528	7.67328	1	0.242874	63.9462
GOTERM_CC_FAT	GO:0005576~extracellular region	26	20.8	0.0586659	2006, 338, 1296, 760, 1956, 3606, 7414, 5045, 925, 335, 3949, 3458, 721, 3553, 3558, 2064, 4313, 4312, 4318, 914, 345, 351, 7132, 7076, 1634, 567	117	2010	12782	1.41316	1	0.247995	55.365
GOTERM_BP_FAT	GO:0048598~embryonic morphogenesis	7	5.6	0.0593777	841, 4851, 5663, 6935, 7157, 1499, 4087	123	307	13528	2.50777	1	0.250171	65.2865
GOTERM_CC_FAT	GO:0030017~sarcomere	4	3.2	0.0595969	4313, 7168, 4624, 1499	117	98	12782	4.4591	1	0.248099	55.9504
GOTERM_BP_FAT	GO:0048593~camera-type eye morphogenesis	3	2.4	0.0596981	1296, 6935, 1499	123	44	13528	7.49889	1	0.250885	65.4904
GOTERM_BP_FAT	GO:0002699~positive regulation of immune effector process	3	2.4	0.0596981	567, 3553, 5788	123	44	13528	7.49889	1	0.250885	65.4904
GOTERM_MF_FAT	GO:0034713~type I transforming growth factor beta receptor binding	2	1.6	0.0598828	4092, 4087	115	7	12983	32.2559	1	0.342153	57.3669
GOTERM_MF_FAT	GO:0001784~phosphotyrosine binding	2	1.6	0.0598828	2885, 5594	115	7	12983	32.2559	1	0.342153	57.3669
GOTERM_CC_FAT	GO:0005905~coated pit	3	2.4	0.0603478	3949, 1956, 351	117	44	12782	7.44872	1	0.247545	56.4174
GOTERM_BP_FAT	GO:0014065~phosphoinositide 3-kinase cascade	2	1.6	0.0614591	2064, 3667	123	7	13528	31.4239	1	0.256952	66.5906
GOTERM_BP_FAT	GO:0050663~cytokine secretion	2	1.6	0.0614591	3937, 19	123	7	13528	31.4239	1	0.256952	66.5906
GOTERM_BP_FAT	GO:0032373~positive regulation of sterol transport	2	1.6	0.0614591	4792, 10062	123	7	13528	31.4239	1	0.256952	66.5906
GOTERM_BP_FAT	GO:0032372~negative regulation of sterol transport	2	1.6	0.0614591	4790, 345	123	7	13528	31.4239	1	0.256952	66.5906
GOTERM_BP_FAT	GO:0001916~positive regulation of T cell mediated cytotoxicity	2	1.6	0.0614591	567, 5788	123	7	13528	31.4239	1	0.256952	66.5906
GOTERM_BP_FAT	GO:0032375~negative regulation of cholesterol transport	2	1.6	0.0614591	4790, 345	123	7	13528	31.4239	1	0.256952	66.5906
GOTERM_BP_FAT	GO:0032376~positive regulation of cholesterol transport	2	1.6	0.0614591	4792, 10062	123	7	13528	31.4239	1	0.256952	66.5906
GOTERM_BP_FAT	GO:0010874~regulation of cholesterol efflux	2	1.6	0.0614591	4792, 10062	123	7	13528	31.4239	1	0.256952	66.5906
GOTERM_BP_FAT	GO:0045084~positive regulation of interleukin-12 biosynthetic process	2	1.6	0.0614591	3458, 5970	123	7	13528	31.4239	1	0.256952	66.5906
GOTERM_BP_FAT	GO:0048013~ephrin receptor signaling pathway	2	1.6	0.0614591	2041, 1942	123	7	13528	31.4239	1	0.256952	66.5906
GOTERM_BP_FAT	GO:0045080~positive regulation of chemokine biosynthetic process	2	1.6	0.0614591	3458, 3553	123	7	13528	31.4239	1	0.256952	66.5906
GOTERM_BP_FAT	GO:0031952~regulation of protein amino acid autophosphorylation	2	1.6	0.0614591	3725, 5788	123	7	13528	31.4239	1	0.256952	66.5906
GOTERM_BP_FAT	GO:0032868~response to insulin stimulus	4	3.2	0.061661	2885, 6464, 5970, 3667	123	100	13528	4.39935	1	0.257206	66.7146
GOTERM_BP_FAT	GO:0031396~regulation of protein ubiquitination	4	3.2	0.061661	5710, 8945, 7316, 4092	123	100	13528	4.39935	1	0.257206	66.7146
GOTERM_MF_FAT	GO:0032559~adenyl ribonucleotide binding	20	16	0.0626427	2041, 6714, 2064, 5599, 5894, 19, 1956, 4216, 2043, 2932, 3791, 2071, 7157, 5290, 1022, 4624, 8737, 3932, 5594, 5159	115	1497	12983	1.50829	1	0.350067	59.0627
GOTERM_BP_FAT	GO:0050767~regulation of neurogenesis	5	4	0.0632563	5970, 4851, 5663, 7157, 1942	123	166	13528	3.31276	1	0.262587	67.6793
GOTERM_BP_FAT	GO:0045089~positive regulation of innate immune response	3	2.4	0.0645674	4615, 5970, 4792	123	46	13528	7.17285	1	0.266878	68.4523
GOTERM_BP_FAT	GO:0048660~regulation of smooth muscle cell proliferation	3	2.4	0.0645674	3725, 3458, 1956	123	46	13528	7.17285	1	0.266878	68.4523
GOTERM_BP_FAT	GO:0002791~regulation of peptide secretion	3	2.4	0.0645674	3458, 5781, 3553	123	46	13528	7.17285	1	0.266878	68.4523
GOTERM_MF_FAT	GO:0019838~growth factor binding	4	3.2	0.0649742	2064, 3791, 5045, 5159	115	105	12983	4.30079	1	0.355721	60.4464
GOTERM_CC_FAT	GO:0031983~vesicle lumen	3	2.4	0.065266	338, 7076, 351	117	46	12782	7.12486	1	0.261932	59.3647
GOTERM_BP_FAT	GO:0051329~interphase of mitotic cell cycle	4	3.2	0.0661667	595, 1647, 1956, 351	123	103	13528	4.27121	1	0.272176	69.3717
GOTERM_BP_FAT	GO:0007178~transmembrane receptor protein serine/threonine kinase signaling pathway	4	3.2	0.0661667	3725, 9372, 4092, 4087	123	103	13528	4.27121	1	0.272176	69.3717
GOTERM_CC_FAT	GO:0043025~cell soma	5	4	0.0666496	2932, 5663, 2099, 6654, 5594	117	168	12782	3.25142	1	0.263432	60.1599
GOTERM_BP_FAT	GO:0030029~actin filament-based process	6	4.8	0.0670395	1398, 7430, 3265, 2006, 7168, 4624	123	241	13528	2.73818	1	0.274812	69.8628
GOTERM_BP_FAT	GO:0034622~cellular macromolecular complex assembly	7	5.6	0.067969	6714, 8175, 6635, 6634, 5829, 9372, 4087	123	318	13528	2.42103	1	0.277631	70.3776
GOTERM_MF_FAT	GO:0046875~ephrin receptor binding	2	1.6	0.0681422	1948, 1942	115	8	12983	28.2239	1	0.364835	62.257
GOTERM_MF_FAT	GO:0005031~tumor necrosis factor receptor activity	2	1.6	0.0681422	8764, 7132	115	8	12983	28.2239	1	0.364835	62.257
GOTERM_MF_FAT	GO:0001848~complement binding	2	1.6	0.0681422	1378, 1380	115	8	12983	28.2239	1	0.364835	62.257
GOTERM_MF_FAT	GO:0005021~vascular endothelial growth factor receptor activity	2	1.6	0.0681422	3791, 5159	115	8	12983	28.2239	1	0.364835	62.257
GOTERM_BP_FAT	GO:0051346~negative regulation of hydrolase activity	3	2.4	0.0695653	345, 7157, 335	123	48	13528	6.87398	1	0.282804	71.2424
GOTERM_BP_FAT	GO:0010721~negative regulation of cell development	3	2.4	0.0695653	5663, 4092, 7157	123	48	13528	6.87398	1	0.282804	71.2424
GOTERM_BP_FAT	GO:0010224~response to UV-B	2	1.6	0.0699275	5970, 7508	123	8	13528	27.4959	1	0.283564	71.4353
GOTERM_BP_FAT	GO:0045075~regulation of interleukin-12 biosynthetic process	2	1.6	0.0699275	3458, 5970	123	8	13528	27.4959	1	0.283564	71.4353
GOTERM_BP_FAT	GO:0030857~negative regulation of epithelial cell differentiation	2	1.6	0.0699275	595, 6935	123	8	13528	27.4959	1	0.283564	71.4353
GOTERM_BP_FAT	GO:0045737~positive regulation of cyclin-dependent protein kinase activity	2	1.6	0.0699275	595, 1956	123	8	13528	27.4959	1	0.283564	71.4353
GOTERM_BP_FAT	GO:0009950~dorsal/ventral axis specification	2	1.6	0.0699275	1499, 4087	123	8	13528	27.4959	1	0.283564	71.4353
GOTERM_BP_FAT	GO:0010575~positive regulation vascular endothelial growth factor production	2	1.6	0.0699275	3091, 3553	123	8	13528	27.4959	1	0.283564	71.4353
GOTERM_BP_FAT	GO:0007184~SMAD protein nuclear translocation	2	1.6	0.0699275	3725, 9372	123	8	13528	27.4959	1	0.283564	71.4353
GOTERM_BP_FAT	GO:0019433~triglyceride catabolic process	2	1.6	0.0699275	338, 345	123	8	13528	27.4959	1	0.283564	71.4353
GOTERM_BP_FAT	GO:0030225~macrophage differentiation	2	1.6	0.0699275	841, 4318	123	8	13528	27.4959	1	0.283564	71.4353
GOTERM_BP_FAT	GO:0007183~SMAD protein complex assembly	2	1.6	0.0699275	9372, 4087	123	8	13528	27.4959	1	0.283564	71.4353
GOTERM_BP_FAT	GO:0032469~endoplasmic reticulum calcium ion homeostasis	2	1.6	0.0699275	5663, 351	123	8	13528	27.4959	1	0.283564	71.4353
GOTERM_CC_FAT	GO:0034366~spherical high-density lipoprotein particle	2	1.6	0.070356	345, 335	117	8	12782	27.312	1	0.27286	62.2199
GOTERM_BP_FAT	GO:0060249~anatomical structure homeostasis	4	3.2	0.0708195	3091, 3791, 5159, 1499	123	106	13528	4.15033	1	0.286191	71.9051
GOTERM_BP_FAT	GO:0051325~interphase	4	3.2	0.0708195	595, 1647, 1956, 351	123	106	13528	4.15033	1	0.286191	71.9051
GOTERM_CC_FAT	GO:0005578~proteinaceous extracellular matrix	7	5.6	0.0711506	2006, 4313, 4312, 1296, 4318, 1634, 7076	117	320	12782	2.3898	1	0.272177	62.6484
GOTERM_MF_FAT	GO:0003684~damaged DNA binding	3	2.4	0.0712983	5887, 2071, 7508	115	50	12983	6.77374	1	0.373513	63.9841
GOTERM_BP_FAT	GO:0019217~regulation of fatty acid metabolic process	3	2.4	0.0721106	3667, 345, 10062	123	49	13528	6.7337	1	0.290199	72.5723
GOTERM_BP_FAT	GO:0007411~axon guidance	4	3.2	0.0724025	2064, 2043, 7316, 351	123	107	13528	4.11154	1	0.290688	72.721
GOTERM_CC_FAT	GO:0019897~extrinsic to plasma membrane	3	2.4	0.0754846	4092, 999, 1499	117	50	12782	6.55487	1	0.283232	64.908
GOTERM_MF_FAT	GO:0043120~tumor necrosis factor binding	2	1.6	0.0763296	8764, 7132	115	9	12983	25.0879	1	0.389577	66.5864
GOTERM_BP_FAT	GO:0007204~elevation of cytosolic calcium ion concentration	4	3.2	0.0772463	3553, 3932, 5788, 3558	123	110	13528	3.99941	1	0.306903	75.0812
GOTERM_BP_FAT	GO:0014031~mesenchymal cell development	3	2.4	0.0772902	4851, 3091, 1499	123	51	13528	6.46963	1	0.3065	75.1017
GOTERM_BP_FAT	GO:0001708~cell fate specification	3	2.4	0.0772902	4851, 5663, 1499	123	51	13528	6.46963	1	0.3065	75.1017
GOTERM_BP_FAT	GO:0043524~negative regulation of neuron apoptosis	3	2.4	0.0772902	3265, 5663, 5045	123	51	13528	6.46963	1	0.3065	75.1017
GOTERM_BP_FAT	GO:0048762~mesenchymal cell differentiation	3	2.4	0.0772902	4851, 3091, 1499	123	51	13528	6.46963	1	0.3065	75.1017
GOTERM_BP_FAT	GO:0033275~actin-myosin filament sliding	2	1.6	0.0783202	7168, 4624	123	9	13528	24.4408	1	0.30946	75.5777
GOTERM_BP_FAT	GO:0042104~positive regulation of activated T cell proliferation	2	1.6	0.0783202	3606, 3558	123	9	13528	24.4408	1	0.30946	75.5777
GOTERM_BP_FAT	GO:0046464~acylglycerol catabolic process	2	1.6	0.0783202	338, 345	123	9	13528	24.4408	1	0.30946	75.5777
GOTERM_BP_FAT	GO:0010884~positive regulation of lipid storage	2	1.6	0.0783202	338, 4790	123	9	13528	24.4408	1	0.30946	75.5777
GOTERM_BP_FAT	GO:0044269~glycerol ether catabolic process	2	1.6	0.0783202	338, 345	123	9	13528	24.4408	1	0.30946	75.5777
GOTERM_BP_FAT	GO:0010574~regulation of vascular endothelial growth factor production	2	1.6	0.0783202	3091, 3553	123	9	13528	24.4408	1	0.30946	75.5777
GOTERM_BP_FAT	GO:0030049~muscle filament sliding	2	1.6	0.0783202	7168, 4624	123	9	13528	24.4408	1	0.30946	75.5777
GOTERM_BP_FAT	GO:0046461~neutral lipid catabolic process	2	1.6	0.0783202	338, 345	123	9	13528	24.4408	1	0.30946	75.5777
GOTERM_BP_FAT	GO:0010717~regulation of epithelial to mesenchymal transition	2	1.6	0.0783202	4092, 4087	123	9	13528	24.4408	1	0.30946	75.5777
GOTERM_BP_FAT	GO:0001914~regulation of T cell mediated cytotoxicity	2	1.6	0.0783202	567, 5788	123	9	13528	24.4408	1	0.30946	75.5777
GOTERM_BP_FAT	GO:0043491~protein kinase B signaling cascade	2	1.6	0.0783202	5290, 3667	123	9	13528	24.4408	1	0.30946	75.5777
GOTERM_BP_FAT	GO:0042640~anagen	2	1.6	0.0783202	4851, 5663	123	9	13528	24.4408	1	0.30946	75.5777
GOTERM_BP_FAT	GO:0070252~actin-mediated cell contraction	2	1.6	0.0783202	7168, 4624	123	9	13528	24.4408	1	0.30946	75.5777
GOTERM_CC_FAT	GO:0035253~ciliary rootlet	2	1.6	0.0787981	5663, 351	117	9	12782	24.2773	1	0.290597	66.5495
GOTERM_BP_FAT	GO:0022613~ribonucleoprotein complex biogenesis	5	4	0.0798754	5394, 8175, 6635, 6634, 118460	123	180	13528	3.0551	1	0.314174	76.2803
GOTERM_BP_FAT	GO:0060485~mesenchyme development	3	2.4	0.079923	4851, 3091, 1499	123	52	13528	6.34522	1	0.313775	76.3015
GOTERM_BP_FAT	GO:0030705~cytoskeleton-dependent intracellular transport	3	2.4	0.079923	7168, 4624, 351	123	52	13528	6.34522	1	0.313775	76.3015
GOTERM_BP_FAT	GO:0007219~Notch signaling pathway	3	2.4	0.079923	4851, 5663, 351	123	52	13528	6.34522	1	0.313775	76.3015
GOTERM_BP_FAT	GO:0048705~skeletal system morphogenesis	4	3.2	0.080553	4313, 5663, 6935, 5159	123	112	13528	3.92799	1	0.315336	76.5804
GOTERM_BP_FAT	GO:0051130~positive regulation of cellular component organization	5	4	0.0811385	7168, 2932, 867, 3553, 4087	123	181	13528	3.03822	1	0.31674	76.8369
GOTERM_CC_FAT	GO:0030141~secretory granule	5	4	0.0812372	4851, 7076, 3553, 351, 335	117	180	12782	3.03466	1	0.294959	67.7121
GOTERM_CC_FAT	GO:0030665~clathrin coated vesicle membrane	3	2.4	0.0834591	3949, 338, 1956	117	53	12782	6.18384	1	0.29852	68.7385
GOTERM_MF_FAT	GO:0051879~Hsp90 protein binding	2	1.6	0.0844457	2064, 3091	115	10	12983	22.5791	1	0.416947	70.4195
GOTERM_MF_FAT	GO:0070412~R-SMAD binding	2	1.6	0.0844457	3725, 4087	115	10	12983	22.5791	1	0.416947	70.4195
GOTERM_MF_FAT	GO:0043548~phosphoinositide 3-kinase binding	2	1.6	0.0844457	3667, 3932	115	10	12983	22.5791	1	0.416947	70.4195
GOTERM_MF_FAT	GO:0017069~snRNA binding	2	1.6	0.0844457	57819, 51690	115	10	12983	22.5791	1	0.416947	70.4195
GOTERM_BP_FAT	GO:0042476~odontogenesis	3	2.4	0.0852711	760, 682, 1499	123	54	13528	6.11021	1	0.329887	78.573
GOTERM_BP_FAT	GO:0045088~regulation of innate immune response	3	2.4	0.0852711	4615, 5970, 4792	123	54	13528	6.11021	1	0.329887	78.573
GOTERM_BP_FAT	GO:0006983~ER overload response	2	1.6	0.0866378	2932, 7157	123	10	13528	21.9967	1	0.333792	79.1197
GOTERM_BP_FAT	GO:0045073~regulation of chemokine biosynthetic process	2	1.6	0.0866378	3458, 3553	123	10	13528	21.9967	1	0.333792	79.1197
GOTERM_BP_FAT	GO:0045687~positive regulation of glial cell differentiation	2	1.6	0.0866378	5970, 4851	123	10	13528	21.9967	1	0.333792	79.1197
GOTERM_BP_FAT	GO:0050673~epithelial cell proliferation	2	1.6	0.0866378	1296, 5663	123	10	13528	21.9967	1	0.333792	79.1197
GOTERM_BP_FAT	GO:0030858~positive regulation of epithelial cell differentiation	2	1.6	0.0866378	4851, 1499	123	10	13528	21.9967	1	0.333792	79.1197
GOTERM_CC_FAT	GO:0031901~early endosome membrane	2	1.6	0.0871641	567, 9372	117	10	12782	21.8496	1	0.306517	70.3832
GOTERM_CC_FAT	GO:0005916~fascia adherens	2	1.6	0.0871641	7414, 1499	117	10	12782	21.8496	1	0.306517	70.3832
GOTERM_BP_FAT	GO:0051048~negative regulation of secretion	3	2.4	0.0879849	5781, 3553, 335	123	55	13528	5.99911	1	0.3376	79.6457
GOTERM_BP_FAT	GO:0051592~response to calcium ion	3	2.4	0.0879849	595, 1956, 2033	123	55	13528	5.99911	1	0.3376	79.6457
GOTERM_CC_FAT	GO:0044433~cytoplasmic vesicle part	5	4	0.0904198	3949, 338, 1956, 7076, 351	117	187	12782	2.92107	1	0.312915	71.762
GOTERM_BP_FAT	GO:0042542~response to hydrogen peroxide	3	2.4	0.0907244	3725, 2033, 5970	123	56	13528	5.89199	1	0.34586	80.677
GOTERM_BP_FAT	GO:0048771~tissue remodeling	3	2.4	0.0907244	2064, 3091, 1499	123	56	13528	5.89199	1	0.34586	80.677
GOTERM_BP_FAT	GO:0051480~cytosolic calcium ion homeostasis	4	3.2	0.0908335	3553, 3932, 5788, 3558	123	118	13528	3.72826	1	0.345618	80.717
GOTERM_CC_FAT	GO:0043005~neuron projection	7	5.6	0.09102	760, 2932, 5663, 2099, 351, 1499, 5594	117	342	12782	2.23607	1	0.311293	72.0096
GOTERM_MF_FAT	GO:0016303~1-phosphatidylinositol-3-kinase activity	2	1.6	0.0924911	5290, 5296	115	11	12983	20.5265	1	0.442268	73.8132
GOTERM_MF_FAT	GO:0005072~transforming growth factor beta receptor, cytoplasmic mediator activity	2	1.6	0.0924911	4092, 4087	115	11	12983	20.5265	1	0.442268	73.8132
GOTERM_BP_FAT	GO:0000122~negative regulation of transcription from RNA polymerase II promoter	6	4.8	0.0928126	6774, 4790, 6935, 4092, 7157, 1499	123	266	13528	2.48084	1	0.351341	81.4298
GOTERM_BP_FAT	GO:0010565~regulation of cellular ketone metabolic process	3	2.4	0.0934889	3667, 345, 10062	123	57	13528	5.78862	1	0.352889	81.6677
GOTERM_BP_FAT	GO:0048738~cardiac muscle tissue development	3	2.4	0.0934889	7168, 4624, 4092	123	57	13528	5.78862	1	0.352889	81.6677
GOTERM_BP_FAT	GO:0030336~negative regulation of cell migration	3	2.4	0.0934889	7168, 7414, 4092	123	57	13528	5.78862	1	0.352889	81.6677
GOTERM_MF_FAT	GO:0030554~adenyl nucleotide binding	20	16	0.0938609	2041, 6714, 2064, 5599, 5894, 19, 1956, 4216, 2043, 2932, 3791, 2071, 7157, 5290, 1022, 4624, 8737, 3932, 5594, 5159	115	1577	12983	1.43178	1	0.442087	74.3536
GOTERM_CC_FAT	GO:0031012~extracellular matrix	7	5.6	0.0939431	2006, 4313, 4312, 1296, 4318, 1634, 7076	117	345	12782	2.21662	1	0.316494	73.187
GOTERM_BP_FAT	GO:0042060~wound healing	5	4	0.0943085	2064, 7168, 4851, 3091, 3553	123	191	13528	2.87916	1	0.354881	81.9521
GOTERM_CC_FAT	GO:0005911~cell-cell junction	5	4	0.0945023	1003, 7414, 4092, 999, 1499	117	190	12782	2.87494	1	0.314764	73.407
GOTERM_BP_FAT	GO:0046636~negative regulation of alpha-beta T cell activation	2	1.6	0.0948809	151888, 8764	123	11	13528	19.997	1	0.356084	82.1482
GOTERM_BP_FAT	GO:0032370~positive regulation of lipid transport	2	1.6	0.0948809	4792, 10062	123	11	13528	19.997	1	0.356084	82.1482
GOTERM_BP_FAT	GO:0043586~tongue development	2	1.6	0.0948809	2064, 1956	123	11	13528	19.997	1	0.356084	82.1482
GOTERM_BP_FAT	GO:0031663~lipopolysaccharide-mediated signaling pathway	2	1.6	0.0948809	4792, 5594	123	11	13528	19.997	1	0.356084	82.1482
GOTERM_BP_FAT	GO:0014015~positive regulation of gliogenesis	2	1.6	0.0948809	5970, 4851	123	11	13528	19.997	1	0.356084	82.1482
GOTERM_BP_FAT	GO:0043330~response to exogenous dsRNA	2	1.6	0.0948809	4792, 5594	123	11	13528	19.997	1	0.356084	82.1482
GOTERM_BP_FAT	GO:0033081~regulation of T cell differentiation in the thymus	2	1.6	0.0948809	2064, 6935	123	11	13528	19.997	1	0.356084	82.1482
GOTERM_BP_FAT	GO:0031571~G1 DNA damage checkpoint	2	1.6	0.0948809	595, 7157	123	11	13528	19.997	1	0.356084	82.1482
GOTERM_BP_FAT	GO:0009650~UV protection	2	1.6	0.0948809	2071, 2073	123	11	13528	19.997	1	0.356084	82.1482
GOTERM_BP_FAT	GO:0046686~response to cadmium ion	2	1.6	0.0948809	5599, 1499	123	11	13528	19.997	1	0.356084	82.1482
GOTERM_BP_FAT	GO:0048010~vascular endothelial growth factor receptor signaling pathway	2	1.6	0.0948809	3791, 5159	123	11	13528	19.997	1	0.356084	82.1482
GOTERM_BP_FAT	GO:0022409~positive regulation of cell-cell adhesion	2	1.6	0.0948809	3553, 4092	123	11	13528	19.997	1	0.356084	82.1482
GOTERM_CC_FAT	GO:0000307~cyclin-dependent protein kinase holoenzyme complex	2	1.6	0.0954548	595, 5111	117	11	12782	19.8632	1	0.314196	73.7778
GOTERM_BP_FAT	GO:0050708~regulation of protein secretion	3	2.4	0.0962777	3458, 335, 3558	123	58	13528	5.68881	1	0.359858	82.6184
GOTERM_BP_FAT	GO:0030518~steroid hormone receptor signaling pathway	3	2.4	0.0962777	1022, 2099, 1499	123	58	13528	5.68881	1	0.359858	82.6184
GOTERM_BP_FAT	GO:0019226~transmission of nerve impulse	7	5.6	0.0968695	2064, 5663, 7316, 11337, 351, 1499, 5594	123	350	13528	2.19967	1	0.361101	82.8141
GOTERM_BP_FAT	GO:0032535~regulation of cellular component size	6	4.8	0.0985048	2006, 6548, 2033, 7157, 351, 3558	123	271	13528	2.43506	1	0.365566	83.3441
