# Supplementary material for: Identification of Age-Related Macular Degeneration Related Genes by Applying Shortest Path Algorithm in Protein-Protein Interaction Network
Source: Biomed Res Int. 2013 Dec 18;2013:523415. doi: 10.1155/2013/523415 (PMC3878555; doi:10.1155/2013/523415)
Supplement: Supplementary file 1 — The description of the Supplementary Material is as follows: "The Supplementary Material contains three files. In details, Supplementary Material I lists 168 shortest path genes identified by our method; Supplementary Material II lists the GO analysis results of 125 genes; Supplementary Material III lists the KEGG analysis results of 125 genes" [file 523415.f1.zip › Supp_III.xlsx]

## Sheet: KEGG_enrichment
Supplementary Material II. KEGG enrichment results of 125 genes
Category	Term	Count	Percentage	P-value	Genes	List Total	Pop Hits	Pop Total	Fold Enrichment	Bonferroni	Benjamini	FDR
KEGG_PATHWAY	hsa04660:T cell receptor signaling pathway	22	17.6	1.52979e-15	3725, 920, 3265, 8517, 5894, 5970, 2932, 925, 867, 5290, 3937, 3458, 5335, 2885, 4790, 4792, 3932, 5788, 5296, 6654, 5594, 3558	106	108	5085	9.77201	1.53877e-13	1.53877e-13	1.72085e-12
KEGG_PATHWAY	hsa05200:Pathways in cancer	34	27.2	3.27015e-15	3725, 841, 3265, 8517, 5599, 6774, 5894, 1956, 2033, 5970, 2932, 867, 1499, 8772, 5159, 595, 2064, 4313, 4312, 4318, 3091, 7157, 1398, 5290, 1399, 5335, 2885, 4790, 4792, 5296, 6654, 999, 5594, 4087	106	328	5085	4.97268	3.18745e-13	1.59317e-13	3.56382e-12
KEGG_PATHWAY	hsa05220:Chronic myeloid leukemia	18	14.4	6.67241e-14	595, 3265, 8517, 5781, 5894, 6464, 5970, 867, 7157, 1398, 5290, 1399, 2885, 4790, 4792, 5296, 6654, 5594	106	75	5085	11.5132	6.60572e-12	2.20191e-12	7.39186e-11
KEGG_PATHWAY	hsa05215:Prostate cancer	19	15.2	9.62597e-14	595, 3265, 2064, 8517, 5894, 1956, 2033, 5970, 2932, 7157, 1499, 5290, 2885, 4790, 4792, 5296, 6654, 5594, 5159	106	89	5085	10.2411	9.52938e-12	2.38232e-12	1.06637e-10
KEGG_PATHWAY	hsa04722:Neurotrophin signaling pathway	21	16.8	3.31251e-13	3725, 3265, 5599, 5781, 5894, 6464, 5970, 2932, 5663, 7157, 1398, 5290, 1399, 5335, 2885, 3667, 4790, 4792, 5296, 6654, 5594	106	124	5085	8.12424	3.27978e-11	6.55953e-12	3.67018e-10
KEGG_PATHWAY	hsa04012:ErbB signaling pathway	18	14.4	9.11397e-13	3725, 3265, 6714, 2064, 5599, 5894, 1956, 6464, 2932, 867, 1398, 5290, 1399, 5335, 2885, 5296, 6654, 5594	106	87	5085	9.92518	9.02268e-11	1.50377e-11	1.00966e-09
KEGG_PATHWAY	hsa05213:Endometrial cancer	14	11.2	1.8996e-11	595, 3265, 2064, 5894, 1956, 2932, 7157, 1499, 5290, 2885, 5296, 6654, 5594, 999	106	52	5085	12.9155	1.88061e-09	2.68658e-10	2.10444e-08
KEGG_PATHWAY	hsa04662:B cell receptor signaling pathway	15	12	2.10144e-10	3725, 3265, 8517, 5894, 930, 5970, 2932, 1380, 5290, 2885, 4790, 4792, 5296, 6654, 5594	106	75	5085	9.59434	2.08043e-08	2.60053e-09	2.32805e-07
KEGG_PATHWAY	hsa04510:Focal adhesion	22	17.6	4.19906e-10	3725, 595, 3265, 6714, 2064, 5599, 5894, 1956, 6464, 2932, 7414, 3791, 1499, 1398, 5290, 1399, 2885, 5829, 5296, 6654, 5594, 5159	106	201	5085	5.25063	4.15707e-08	4.61897e-09	4.65186e-07
KEGG_PATHWAY	hsa05210:Colorectal cancer	15	12	1.02076e-09	3725, 595, 5599, 5894, 1956, 2932, 7157, 1499, 5290, 2885, 5296, 6654, 5159, 4087, 5594	106	84	5085	8.56637	1.01055e-07	1.01055e-08	1.13083e-06
KEGG_PATHWAY	hsa05212:Pancreatic cancer	14	11.2	1.5079e-09	595, 2064, 8517, 5599, 6774, 5894, 1956, 5970, 7157, 5290, 4790, 5296, 4087, 5594	106	72	5085	9.32783	1.49282e-07	1.35711e-08	1.6705e-06
KEGG_PATHWAY	hsa05214:Glioma	13	10.4	3.53509e-09	595, 3265, 5894, 6464, 1956, 7157, 5290, 5335, 2885, 5296, 6654, 5159, 5594	106	63	5085	9.89892	3.49974e-07	2.91645e-08	3.91629e-06
KEGG_PATHWAY	hsa05219:Bladder cancer	11	8.8	7.76091e-09	595, 3265, 2064, 4313, 4312, 4318, 5894, 1956, 7157, 999, 5594	106	42	5085	12.564	7.6833e-07	5.91023e-08	8.5978e-06
KEGG_PATHWAY	hsa05223:Non-small cell lung cancer	12	9.6	7.83227e-09	595, 5290, 3265, 2064, 5335, 2885, 5894, 1956, 6654, 5296, 7157, 5594	106	54	5085	10.6604	7.75394e-07	5.53853e-08	8.67685e-06
KEGG_PATHWAY	hsa05211:Renal cell carcinoma	13	10.4	1.25012e-08	3725, 3265, 5781, 5894, 2033, 3091, 5290, 1398, 1399, 2885, 5296, 6654, 5594	106	70	5085	8.90903	1.23762e-06	8.25077e-08	1.38492e-05
KEGG_PATHWAY	hsa05221:Acute myeloid leukemia	12	9.6	1.73938e-08	595, 5290, 3265, 8517, 6774, 2885, 5894, 5970, 4790, 6654, 5296, 5594	106	58	5085	9.92518	1.72199e-06	1.07624e-07	1.92695e-05
KEGG_PATHWAY	hsa04620:Toll-like receptor signaling pathway	14	11.2	1.05705e-07	3725, 8517, 841, 5599, 5970, 5290, 4615, 8772, 8737, 3553, 4790, 4792, 5296, 5594	106	101	5085	6.64954	1.04648e-05	6.15577e-07	0.000117104
KEGG_PATHWAY	hsa04210:Apoptosis	13	10.4	1.55712e-07	8517, 841, 5970, 7157, 7132, 5290, 4615, 8772, 8737, 3553, 4790, 4792, 5296	106	87	5085	7.16818	1.54154e-05	8.56417e-07	0.000172503
KEGG_PATHWAY	hsa04062:Chemokine signaling pathway	17	13.6	1.04148e-06	3265, 8517, 6774, 5894, 6464, 5970, 2932, 1398, 5290, 1399, 2885, 4790, 4792, 5829, 5296, 6654, 5594	106	187	5085	4.36106	0.000103101	5.42666e-06	0.00115378
KEGG_PATHWAY	hsa04010:MAPK signaling pathway	20	16	1.5716e-06	3725, 3265, 8517, 5599, 5894, 1956, 4216, 5970, 7157, 7132, 1398, 4616, 1399, 1647, 2885, 3553, 4790, 6654, 5594, 5159	106	267	5085	3.59339	0.000155576	7.77939e-06	0.00174106
KEGG_PATHWAY	hsa04910:Insulin signaling pathway	14	11.2	3.1646e-06	3265, 5599, 5894, 6464, 2932, 867, 5290, 1398, 1399, 2885, 3667, 5296, 6654, 5594	106	135	5085	4.97484	0.000313247	1.49188e-05	0.0035058
KEGG_PATHWAY	hsa05120:Epithelial cell signaling in Helicobacter pylori infection	10	8	8.6485e-06	3725, 8517, 6714, 5599, 5335, 5781, 1956, 5970, 4790, 4792	106	68	5085	7.05466	0.000855839	3.89177e-05	0.00958069
KEGG_PATHWAY	hsa05218:Melanoma	10	8	1.24144e-05	595, 5290, 3265, 5894, 1956, 5296, 7157, 5159, 999, 5594	106	71	5085	6.75658	0.00122828	5.34347e-05	0.0137522
KEGG_PATHWAY	hsa04650:Natural killer cell mediated cytotoxicity	13	10.4	1.52812e-05	3265, 5781, 5894, 6464, 5290, 3458, 3937, 5335, 2885, 3932, 5296, 6654, 5594	106	133	5085	4.68896	0.0015117	6.30333e-05	0.0169277
KEGG_PATHWAY	hsa04664:Fc epsilon RI signaling pathway	10	8	2.69602e-05	5290, 3265, 3937, 5599, 5335, 2885, 5894, 6654, 5296, 5594	106	78	5085	6.15022	0.00266554	0.000106758	0.0298634
KEGG_PATHWAY	hsa04912:GnRH signaling pathway	11	8.8	2.82163e-05	3725, 3265, 6714, 4313, 5599, 2885, 5894, 1956, 4216, 6654, 5594	106	98	5085	5.38458	0.00278955	0.000107435	0.0312545
KEGG_PATHWAY	hsa04621:NOD-like receptor signaling pathway	9	7.2	3.3949e-05	8517, 841, 5599, 5970, 3606, 3553, 4790, 4792, 5594	106	62	5085	6.96363	0.00335537	0.000124474	0.0376034
KEGG_PATHWAY	hsa04920:Adipocytokine signaling pathway	9	7.2	6.01323e-05	8517, 5599, 6774, 5781, 5970, 3667, 4790, 4792, 7132	106	67	5085	6.44396	0.00593559	0.000212594	0.0665964
KEGG_PATHWAY	hsa04370:VEGF signaling pathway	9	7.2	0.000135698	5290, 3265, 6714, 5335, 5894, 3791, 5829, 5296, 5594	106	75	5085	5.7566	0.0133452	0.000463169	0.150228
KEGG_PATHWAY	hsa04670:Leukocyte transendothelial migration	11	8.8	0.000139231	1003, 5290, 7430, 4313, 5335, 5781, 4318, 7414, 5829, 5296, 1499	106	118	5085	4.47194	0.0136902	0.000459387	0.154136
KEGG_PATHWAY	hsa04520:Adherens junction	9	7.2	0.000163572	2064, 6714, 1956, 2033, 7414, 999, 1499, 5594, 4087	106	77	5085	5.60708	0.0160645	0.000522281	0.181061
KEGG_PATHWAY	hsa05216:Thyroid cancer	6	4.8	0.000273073	595, 3265, 7157, 999, 1499, 5594	106	29	5085	9.92518	0.0266756	0.000844577	0.302103
KEGG_PATHWAY	hsa04810:Regulation of actin cytoskeleton	14	11.2	0.000425216	3265, 5894, 1956, 6548, 7414, 5290, 1398, 7430, 1399, 5829, 5296, 6654, 5159, 5594	106	215	5085	3.12374	0.0412312	0.00127511	0.470061
KEGG_PATHWAY	hsa04622:RIG-I-like receptor signaling pathway	8	6.4	0.000588338	8517, 841, 5599, 8772, 8737, 5970, 4790, 4792	106	71	5085	5.40526	0.0565978	0.00171214	0.649851
KEGG_PATHWAY	hsa05340:Primary immunodeficiency	6	4.8	0.000676554	920, 8517, 930, 925, 3932, 5788	106	35	5085	8.22372	0.0648062	0.0019125	0.746959
KEGG_PATHWAY	hsa04623:Cytosolic DNA-sensing pathway	7	5.6	0.000857022	8517, 8737, 5970, 3606, 3553, 4790, 4792	106	55	5085	6.10549	0.0813789	0.00235504	0.945348
KEGG_PATHWAY	hsa04630:Jak-STAT signaling pathway	11	8.8	0.00124106	595, 5290, 3458, 6774, 5781, 2885, 2033, 867, 6654, 5296, 3558	106	155	5085	3.40444	0.115684	0.00331722	1.36632
KEGG_PATHWAY	hsa04320:Dorso-ventral axis formation	5	4	0.00155482	2885, 1956, 4851, 6654, 5594	106	25	5085	9.59434	0.142768	0.00404565	1.70905
KEGG_PATHWAY	hsa05222:Small cell lung cancer	8	6.4	0.00160923	595, 5290, 8517, 5970, 4790, 4792, 5296, 7157	106	84	5085	4.56873	0.147381	0.00407991	1.76837
KEGG_PATHWAY	hsa03420:Nucleotide excision repair	6	4.8	0.00195367	1022, 5887, 2071, 2073, 5111, 7508	106	44	5085	6.5416	0.176015	0.00482838	2.14316
KEGG_PATHWAY	hsa04540:Gap junction	8	6.4	0.00225036	3265, 6714, 2885, 5894, 1956, 6654, 5159, 5594	106	89	5085	4.31206	0.199914	0.00542514	2.46494
KEGG_PATHWAY	hsa04666:Fc gamma R-mediated phagocytosis	8	6.4	0.00326249	1398, 5290, 1399, 5335, 5894, 5296, 5788, 5594	106	95	5085	4.03972	0.276399	0.00767314	3.55546
KEGG_PATHWAY	hsa04310:Wnt signaling pathway	10	8	0.00373941	3725, 595, 5599, 2033, 2932, 5663, 8945, 7157, 1499, 4087	106	151	5085	3.17693	0.309884	0.00858838	4.06546
KEGG_PATHWAY	hsa04110:Cell cycle	9	7.2	0.00404239	595, 4616, 1022, 1647, 2033, 2932, 5111, 7157, 4087	106	125	5085	3.45396	0.330355	0.00907241	4.38818
KEGG_PATHWAY	hsa04640:Hematopoietic cell lineage	7	5.6	0.00830858	920, 1378, 930, 914, 925, 3553, 1380	106	86	5085	3.90467	0.562197	0.0181878	8.82868
KEGG_PATHWAY	hsa04350:TGF-beta signaling pathway	7	5.6	0.00877783	3458, 2033, 1634, 9372, 4092, 5594, 4087	106	87	5085	3.85979	0.582237	0.0187959	9.30546
KEGG_PATHWAY	hsa04930:Type II diabetes mellitus	5	4	0.015504	5290, 5599, 3667, 5296, 5594	106	47	5085	5.10337	0.787097	0.0323774	15.895
KEGG_PATHWAY	hsa03018:RNA degradation	5	4	0.0293801	5394, 25804, 57819, 51690, 118460	106	57	5085	4.20804	0.947776	0.0596513	28.1335
KEGG_PATHWAY	hsa03040:Spliceosome	7	5.6	0.0451507	8175, 25804, 6635, 6634, 57819, 10262, 51690	106	126	5085	2.66509	0.989683	0.0891221	40.0607
KEGG_PATHWAY	hsa04360:Axon guidance	7	5.6	0.0496606	2041, 3265, 1948, 2043, 2932, 5594, 1942	106	129	5085	2.60312	0.993544	0.0959344	43.1234
KEGG_PATHWAY	hsa05010:Alzheimer's disease	8	6.4	0.0505774	841, 8772, 2932, 5663, 3553, 351, 7132, 5594	106	163	5085	2.35444	0.994132	0.0958406	43.7284
KEGG_PATHWAY	hsa04115:p53 signaling pathway	5	4	0.0510928	595, 4616, 841, 1647, 7157	106	68	5085	3.52733	0.994439	0.0950231	44.0659
KEGG_PATHWAY	hsa04960:Aldosterone-regulated sodium reabsorption	4	3.2	0.0517781	5290, 3667, 5296, 5594	106	41	5085	4.68017	0.994823	0.0945393	44.5118
KEGG_PATHWAY	hsa04916:Melanogenesis	6	4.8	0.0530157	3265, 5894, 2033, 2932, 1499, 5594	106	99	5085	2.90738	0.995451	0.095042	45.3088
KEGG_PATHWAY	hsa03320:PPAR signaling pathway	5	4	0.0534079	4312, 7316, 345, 10062, 335	106	69	5085	3.47621	0.995634	0.094073	45.5592
KEGG_PATHWAY	hsa04150:mTOR signaling pathway	4	3.2	0.0914764	5290, 3091, 5296, 5594	106	52	5085	3.69013	0.999925	0.155996	65.4511
